# Supplementary material for: Self-assembly of pericentriolar material in interphase cells lacking centrioles
Source: PubMed Central journal article supplement (PMC9307276; doi:10.7554/elife.77892), 2022-07-05

**Source data 1**

**Uncropped Western blots shown in this manuscript**

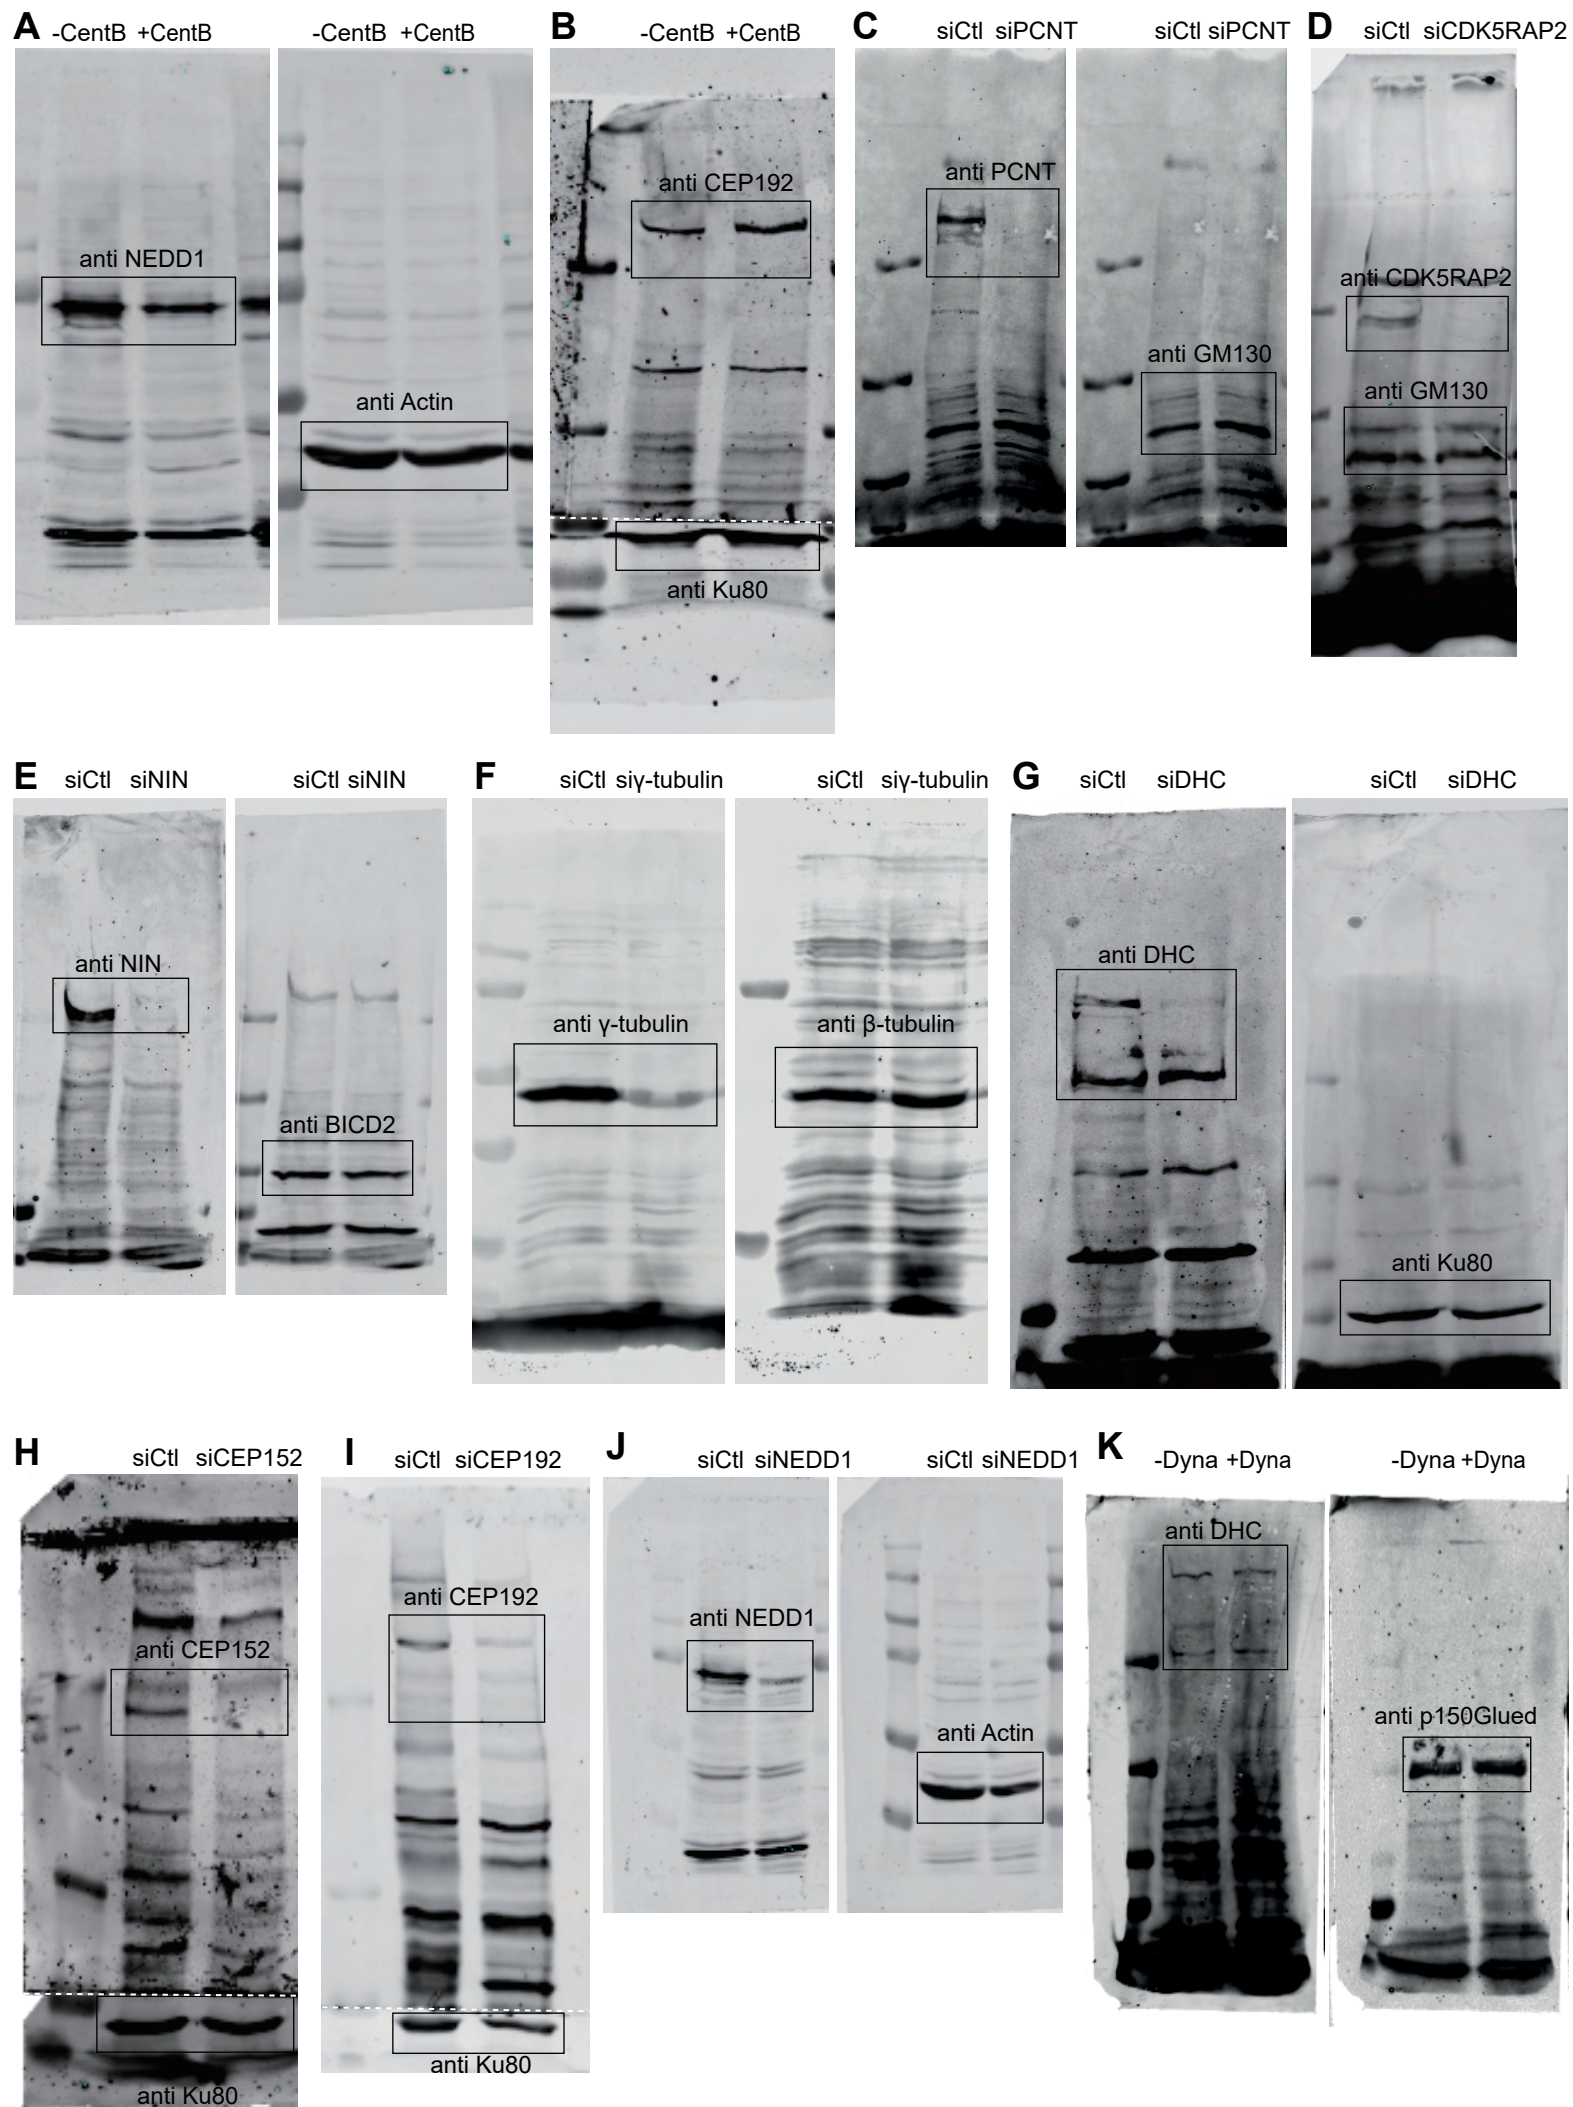

Supplement: elife-77892-data1.pdf [file elife-77892-data1.pdf]
