# Supplementary material for: Self-assembly of pericentriolar material in interphase cells lacking centrioles
Source: PubMed Central journal article supplement (PMC9307276; doi:10.7554/elife.77892), 2022-07-05

Source data 2

Uncropped Western blots shown in this manuscript

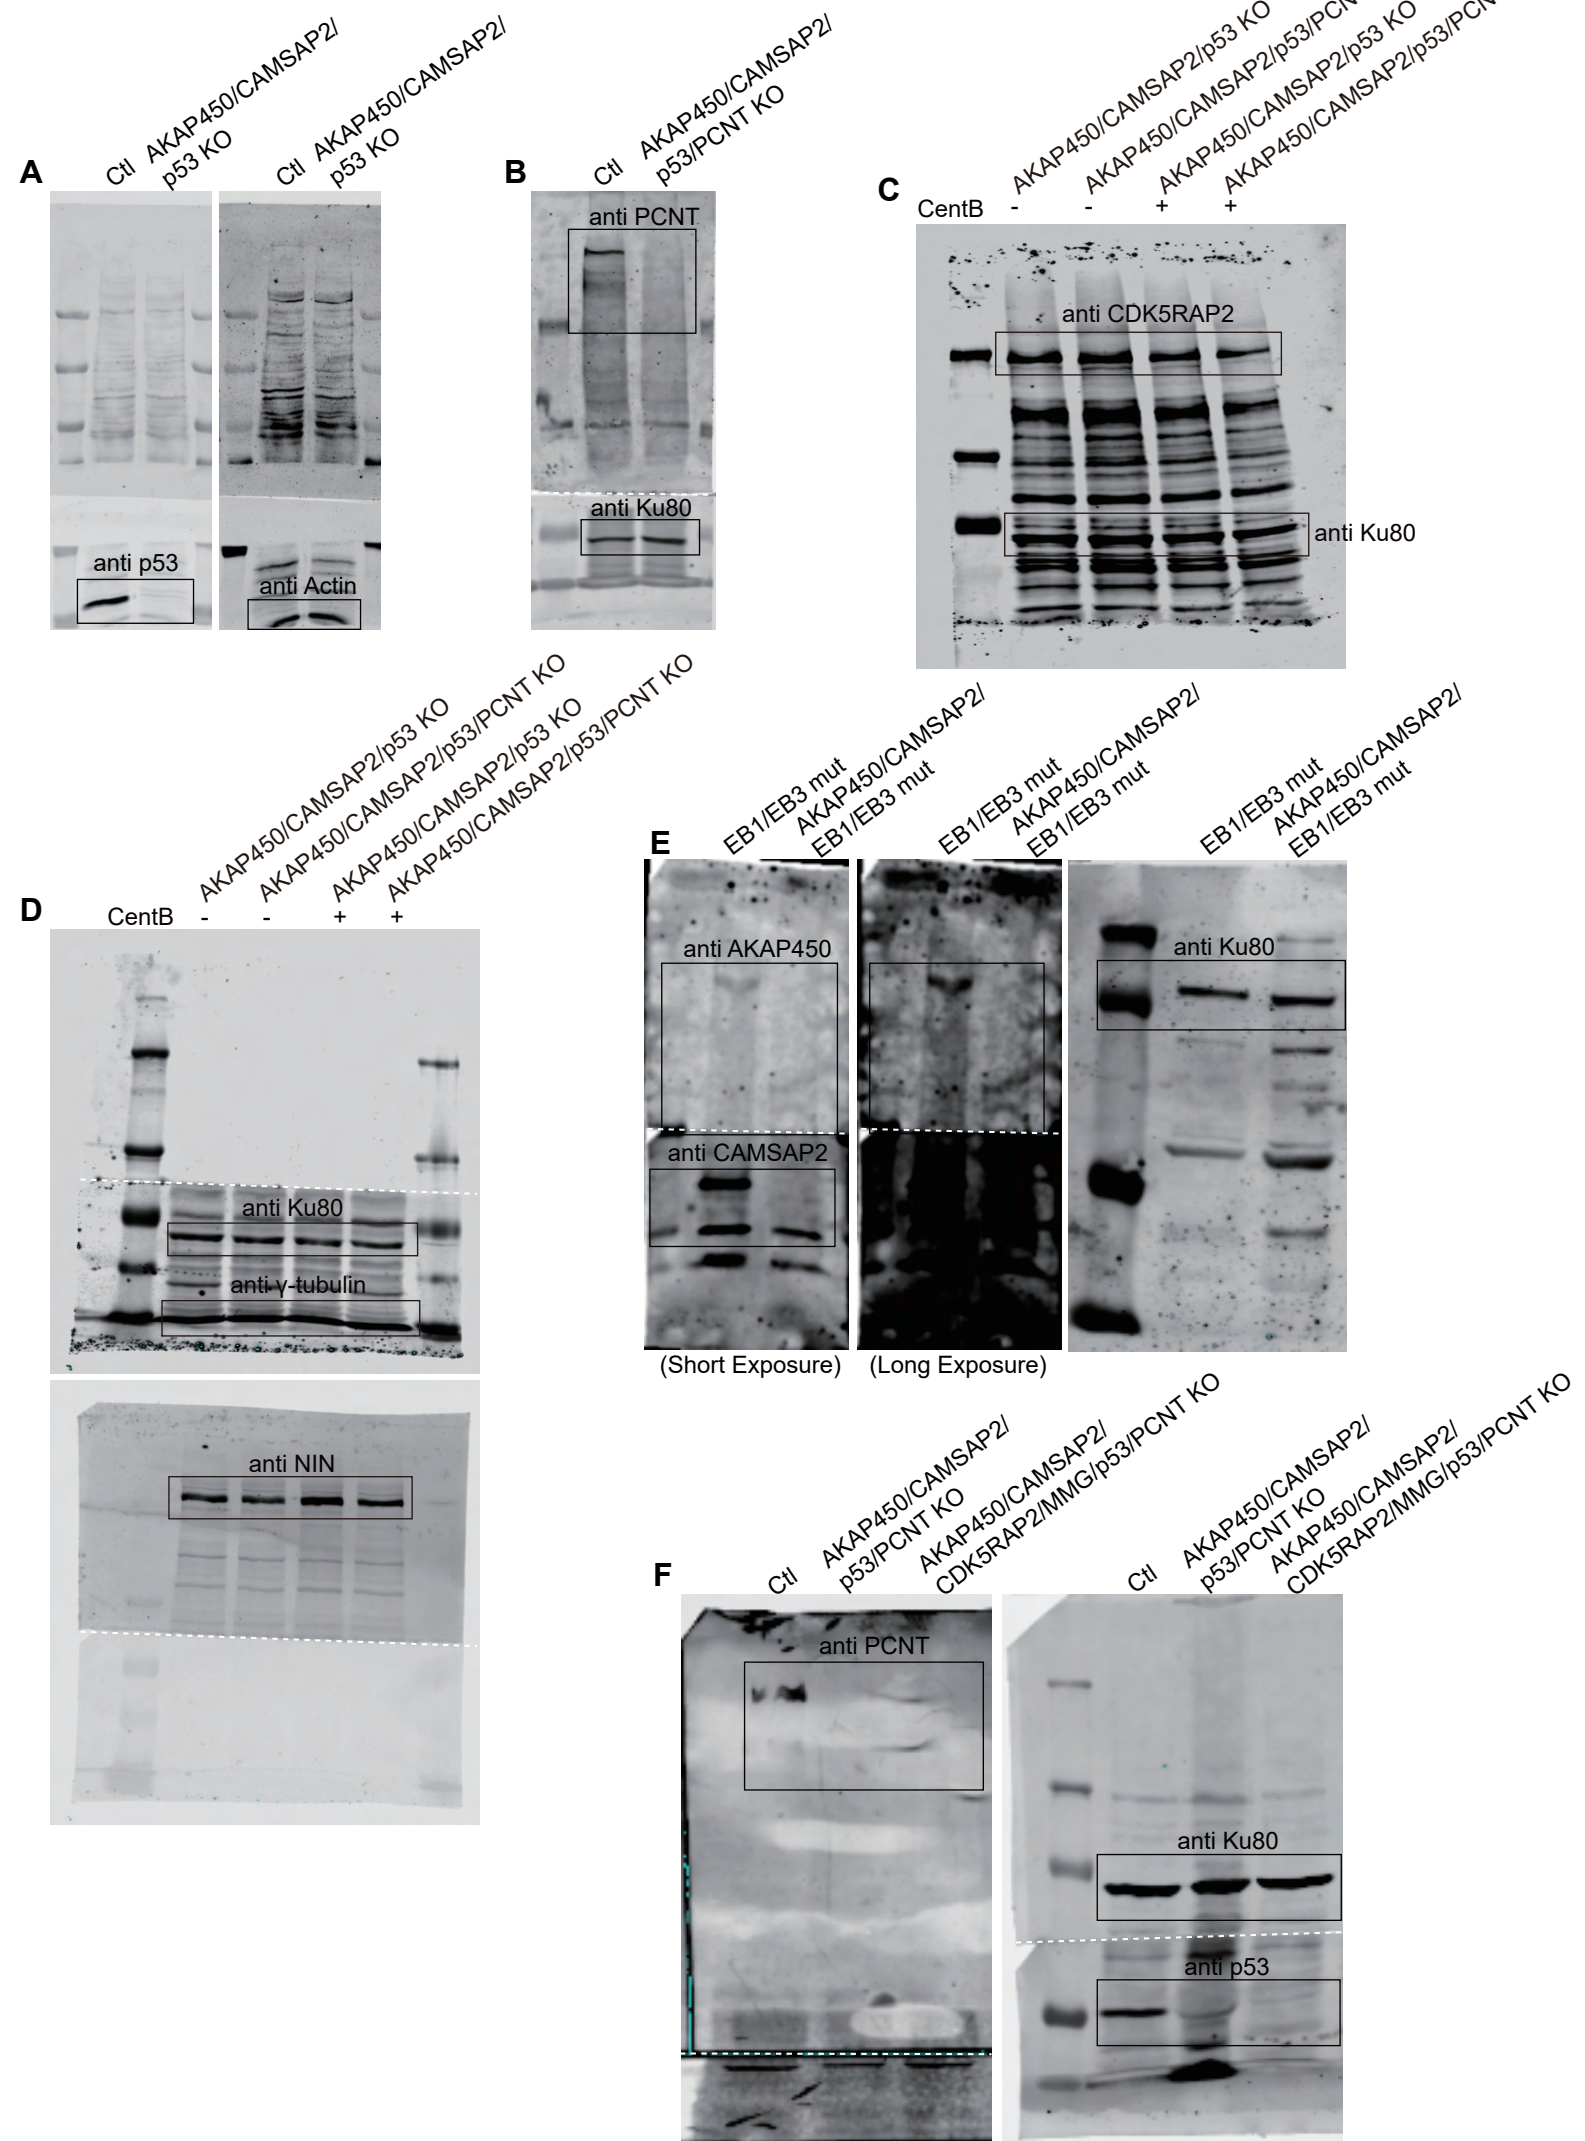

Supplement: elife-77892-data2.pdf [file elife-77892-data2.pdf]
