# Supplementary material for: Self-assembly of pericentriolar material in interphase cells lacking centrioles
Source: eLife. 2022 Jul 5;11:e77892. doi: 10.7554/eLife.77892 (PMC9307276; doi:10.7554/eLife.77892)
Supplement: Figure 1—figure supplement 1—source data 1. [file elife-77892-fig1-figsupp1-data1.xlsx]

## Sheet: Figure 1-figure supplement 1B
Figure 1-figure supplement 1B
Normalized CAMSAP2 intensity and and the resulted PCM cluster formation after CAMSAP2 depletion
Normalized CAMSAP2 intensity, %					% of the cells
siLuci	siCAMSAP2					dispersed PCM			clustered PCM
80.9839	3.68339				siLuci	98			2
108.649	3.78721				siCAMSAP2	15.3846			84.6154
96.7031	3.57809
85.6176	3.57237				number of cells
75.4343	3.72419					dispersed PCM			clustered PCM
107.202	3.63066				siLuci	95	100	99	5	0	1
81.6881	5.58439				siCAMSAP2	16	22	8	85	91	77
100.965	8.37062
106.451	10.6286
90.9516	7.27292
93.1147	4.66021
102.438	4.26526
88.7459	5.28102
77.5221	5.36842
73.8086	4.05615
84.0857	4.57109
99.0293	6.14909
119.005	6.02733
115.856	8.12255
90.6625	4.92524
101.527	4.28981
107.367	6.46523
102.462	5.4439
114.249	3.99458
113.617	3.58649
106.936	4.11749
106.433	4.09116
112.912	5.16327
111.936	4.34392
78.2615	3.88671
89.044	3.78145
94.4268	3.83756
107.907	4.02712
109.582	4.2217
110.331	5.97751
119.514	8.43878
111.674	8.94628
102.906	5.16971
88.8928	6.43895
98.9127	9.08652
107.925	10.8922
98.3054	8.73688
116.969	4.84809
110.972	5.09357
85.7248	5.89405
101.173	6.22028
107.924	5.38559
102.526	4.5852
109.524	7.317
110.432	6.94751
98.0869	7.26184
109.598	9.33805
100.557	11.439
97.4676	7.28209
100.503	6.04009
99.7042	4.32737
67.1222	4.82949
84.3678	5.10273
93.6414	4.02606
94.1195	3.37025
100.06	4.65612
104.861	4.86209
67.8388
81.7231
106.245
100.895
95.0987
113.745
95.2425
112.697
100.864
96.2416
111.512
105.761
115.784
106.981

## Sheet: Figure 1-figure supplement 1F
Figure 1-figure supplement 1F
Quantification of the proportion of cells with different types of microtubule minus end organization in wild type (WT) and CAMSAP2 knockout RPE1 cell lines with indicated treatment.
	number of cells
						WT												CAMSAP2 KO
		DMSO			CB			BFA			BFA+CB			DMSO			CB			BFA			BFA+CB
Dispersed cluster	0	0	0	113	122	142	0	0	0	100	89	132	0	0	0	140	177	101	0	0	0	127	122	195
Compact cluster	0	0	0	0	0	0	0	0	0	0	0	1	0	0	0	0	0	0	0	0	0	19	22	27
Centrin positive	105	93	121	13	11	12	119	138	155	11	7	13	99	108	133	9	12	6	153	120	111	13	13	15
	% of cell
						WT												CAMSAP2 KO
		DMSO			CB			BFA			BFA+CB			DMSO			CB			BFA			BFA+CB
Dispersed cluster	0	0	0	89.6825	91.7293	92.2078	0	0	0	90.0901	92.7083	90.411	0	0	0	93.9597	93.6508	94.3925	0	0	0	79.8742	77.707	82.2785
Compact cluster	0	0	0	0	0	0	0	0	0	0	0	0.684932	0	0	0	0	0	0	0	0	0	11.9497	14.0127	11.3924
Centrin positive	100	100	100	10.3175	8.27068	7.79221	100	100	100	9.90991	7.29167	8.90411	100	100	100	6.04027	6.34921	5.60748	100	100	100	8.1761	8.28025	6.32911
