# Supplementary material for: Self-assembly of pericentriolar material in interphase cells lacking centrioles
Source: eLife. 2022 Jul 5;11:e77892. doi: 10.7554/eLife.77892 (PMC9307276; doi:10.7554/eLife.77892)
Supplement: Figure 1—figure supplement 2—source data 1. [file elife-77892-fig1-figsupp2-data1.xlsx]

## Sheet: Figure 1-figure supplement 2B
Figure 1-figure supplement 2B
Quantification of the main PCM organization types in centrinone-treated AKAP450 knockout and AKAP450/CAMSAP2 knockout RPE1 cells.
% of the cells
		Centrin positive			No cluster			Dispersed cluster			Round cluster			Cylindrical cluster
AKAP450 KO	11.0294	12.3529	8.86076	15.4412	9.41177	9.49367	65.4412	73.5294	76.5823	5.14706	3.52941	3.79747	2.94118	1.17647	1.26582
AKAP450/CAMSAP2 KO	5.97826	10.9589	15.7576	8.15217	13.0137	7.27273	6.52174	10.9589	4.24242	38.0435	35.6164	39.3939	41.3043	29.452	33.3333
number of the cells
		Centrin positive			No cluster			Dispersed cluster			Round cluster			Cylindrical cluster
AKAP450 KO	15	21	14	21	13	9	89	135	121	7	6	6	4	2	2
AKAP450/CAMSAP2 KO	11	16	26	15	19	12	12	16	7	70	52	65	76	43	55

## Sheet: Figure 1-figure supplement 2D
Figure 1-figure supplement 2D
Quantification of the main PCM organization types in AKAP450/CAMSAP2 KO RPE1 control cells (siLuciferase) and cells lacking Plk4 and CPAP
% of the cells
	Thymidine	CentB	BI2536			with Centrin			no cluster			dispersed cluster			round cluster			cylindrical cluster
	+	-	-	siLuci	98.9691	99.1071	100	1.03093	0.892857	0	0	0	0	0	0	0	0	0	0
	+	-	-	siCPAP	9.42029	10.9948	5.71429	55.7971	51.3089	53.8095	11.5942	12.5655	13.8095	23.1884	25.1309	26.1905	0	0	0.47619
Fix1	+	-	-	siPlk4	5.09554	7.02703	6.75676	1.27388	2.16216	3.37838	29.2994	34.5946	33.7838	49.6815	48.1081	43.9189	14.6497	8.10811	12.1622
	+	+	-	siLuci	97.1429	89.2473	94.0476	0	0	1.19048	0	3.22581	0	2.85714	7.52688	4.7619	0	0	0
	+	+	-	siCPAP	4.79452	6.875	7.77778	37.6712	31.25	38.3333	21.9178	16.875	16.1111	27.3973	38.125	32.2222	8.21918	6.875	5.55556
	+	+	-	siPlk4	5.91716	8.29268	8.65385	11.8343	12.1951	11.5385	8.28402	7.31707	9.13462	50.8876	49.7561	45.6731	23.0769	22.439	25
	+	-	-	siLuci	96.6667	94.2308	95.5056	1.66667	3.84615	0	1.66667	0	3.37079	0	1.92308	1.1236	0	0	0
	+	-	-	siCPAP	4.6875	2.91971	3.77359	46.875	57.6642	50.9434	27.3438	14.5985	20.1258	21.0938	24.0876	25.1572	0	0.729927	0
	+	-	-	siPlk4	7.25807	8.53659	9.48276	3.22581	1.82927	2.58621	4.83871	7.31707	10.3448	54.0323	53.6585	53.0172	30.6452	28.6585	24.569
Fix2	+	+	-	siLuci	83.3333	87.4074	84.4444	5.55556	2.22222	5.55556	1.85185	3.7037	4.44444	8.33333	4.44444	5.55556	0.925926	2.22222	0
	+	+	-	siCPAP	6.55738	8.03571	7.31707	24.0437	17.4107	21.9512	17.4863	12.9464	18.5366	27.3224	34.8214	31.7073	24.5902	26.7857	20.4878
	+	+	-	siPlk4	8.39695	8.77193	4.84849	11.4504	15.2047	11.5152	6.10687	7.01754	6.66667	42.7481	43.8597	48.4849	31.2977	25.1462	28.4849
	+	+	+	siLuci	86.6667	87.3874	88.3333	8	3.6036	4.16667	2.66667	4.5045	3.33333	2.66667	3.6036	4.16667	0	0.900901	0
	+	+	+	siCPAP	4.51613	3.37838	7.18954	15.4839	12.8378	9.80392	14.1936	16.8919	18.3007	26.4516	32.4324	21.5686	39.3548	34.4595	43.1373
	+	+	+	siPlk4	7.62712	10.7143	7.86517	12.7119	11.4286	10.6742	6.77966	8.57143	6.17978	38.983	38.5714	37.0787	33.8983	30.7143	38.2022
number of the cells
	Thymidine	CentB	BI2536			with Centrin			no cluster			dispersed cluster			round cluster			cylindrical cluster
	+	-	-	siLuci	96	111	84	1	1	0	0	0	0	0	0	0	0	0	0
	+	-	-	siCPAP	13	21	12	77	98	113	16	24	29	32	48	55	0	0	1
Fix1	+	-	-	siPlk4	8	13	10	2	4	5	46	64	50	78	89	65	23	15	18
	+	+	-	siLuci	68	83	79	0	0	1	0	3	0	2	7	4	0	0	0
	+	+	-	siCPAP	7	11	14	55	50	69	32	27	29	40	61	58	12	11	10
	+	+	-	siPlk4	10	17	18	20	25	24	14	15	19	86	102	95	39	46	52
	+	-	-	siLuci	116	98	85	2	4	0	2	0	3	0	2	1	0	0	0
	+	-	-	siCPAP	6	4	6	60	79	81	35	20	32	27	33	40	0	1	0
	+	-	-	siPlk4	9	14	22	4	3	6	6	12	24	67	88	123	38	47	57
Fix2	+	+	-	siLuci	90	118	76	6	3	5	2	5	4	9	6	5	1	3	0
	+	+	-	siCPAP	12	18	15	44	39	45	32	29	38	50	78	65	45	60	42
	+	+	-	siPlk4	11	15	8	15	26	19	8	12	11	56	75	80	41	43	47
	+	+	+	siLuci	65	97	106	6	4	5	2	5	4	2	4	5	0	1	0
	+	+	+	siCPAP	7	5	11	24	19	15	22	25	28	41	48	33	61	51	66
	+	+	+	siPlk4	9	15	14	15	16	19	8	12	11	46	54	66	40	43	68
