# Supplementary material for: Self-assembly of pericentriolar material in interphase cells lacking centrioles
Source: eLife. 2022 Jul 5;11:e77892. doi: 10.7554/eLife.77892 (PMC9307276; doi:10.7554/eLife.77892)
Supplement: Figure 1—source data 1. [file elife-77892-fig1-data1.xlsx]

## Sheet: Figure 1B
Figure 1B
Percentage of cells with centrioles before and after the centrinone treatment
Day 0							day0, %
n=cells with Centrin/CEP135			n=cells without Centrin/CEP135
49			1				98
49			1				98
46			4				92
49			1				98
48			2				96
50			0				100
49			1				98
Day 11
n=cells with Centrin/CEP135			n=cells without Centrin/CEP135				day11, %
11			39				22
13			37				26
10			40				20
9			41				18
5			45				10
17			33				34
12			38				24

## Sheet: Figure 1G
Figure 1G
Quantification of length and width of linear PCM cluster
length, um	width, um
15.6626	2.67641
13.7675	2.06987
11.7295	0.947782
8.74273	1.7334
8.04467	1.30005
8.25724	1.51529
7.93379	1.20177
7.11795	0.933372
20.6943	2.16676
21.3122	2.46754
10.6309	1.15159
11.0655	1.24529
18.0638	1.18474
17.6344	1.35546
6.39516	0.83853
8.28736	1.18474
9.61976	0.968
10.6699	1.85689
11.4293	1.10352
14.0093	1.49664
17.6997	1.89405
7.12593	0.768416
5.92319	1.12438
8.03829	1.45266
16.0769	3.13185
5.9895	1.42032
8.75156	1.87607
12.0518	1.27904
8.55877	1.43658
17.5317	1.53094
15.1617	1.59496
19.4168	2.36784
15.2472	2.91366
10.1521	1.24216
8.93559	1.52737
9.20304	1.73004
11.9186	1.804
10.3414	1.71204
6.69726	1.3647
5.73318	1.31853
13.1058	1.31265
8.84149	1.73395
8.88158	1.48887
8.884	1.34037
12.9387	2.24444
6.02193	0.710842
6.68815	1.24529
11.1747	0.915574
11.2604	1.18881
12.8098	1.37812
6.84594	1.15496
11.294	1.00529
18.8786	1.73173
8.09662	1.26916
10.5877	1.49664
5.19499	1.51529
6.21086	1.91235
4.49973	0.501688
11.5311	2.42999
12.0749	1.54502
12.6726	1.1691
13.8792	0.889834
13.4658	1.71824
18.6746	3.36822
10.4893	2.12661
11.1788	1.54277

## Sheet: Figure 1I
Figure 1I
Normalized fluorescence intensity as a function of time
	normalized intensity
time, min	Whole cluster FRAP				No FRAP		Partial cluster FRAP (whole cluster intensity)					Partial cluster FRAP (FRAP region intensity)
0.0333333	106.603	96.1515	94.895	100.111	100	100.397	100.431	103.232	98.23	105.461	100.732	92.054	100.271	102.163	104.731	94.0115
0.0666667	106.302	101.453	96.7478	104.413	98.4128	100.779	99.5404	103.618	97.9492	103.355	100.974	85.2594	102.189	99.1632	100.803	95.1833
0.1	106.238	96.8251	89.2776	108.157	98.7	102.492	98.8211	101.095	98.599	103.865	100.909	79.5896	106.466	98.6485	104.624	119.336
0.133333	106.124	105.772	99.1176	103.926	98.4564	97.2693	98.2793	101.215	98.1966	105.464	101.886	84.2794	104.307	97.2704	100.546	97.0375
0.166667	106.108	99.2674	102.604	101.072	99.5239	96.9958	96.5943	99.9392	95.8255	102.082	100.841	102.092	104.312	96.205	104.363	91.5906
0.2	106.101	96.8268	103.27	105.751	96.9266	99.6643	97.9134	106	98.1591	102.999	100.144	100.34	101.923	100.981	103.364	130.589
0.233333	105.986	101.205	100.632	103.423	99.506	95.0734	98.9035	107.443	100.634	103.556	99.5166	107.577	105.462	96.6024	108.131	98.0012
0.266667	105.829	104.686	97.3135	102.38	99.5505	99.6659	99.3886	97.979	94.145	102.038	97.3083	103.184	102.081	96.6909	96.8188	120.679
0.3	105.559	101.544	98.7801	103.625	96.1383	97.9796	70.524	111.202	95.6933	103.675	100.669	107.215	104.197	97.9439	104.488	93.5286
0.333333	105.435	99.7298	96.498	103.582	97.3773	99.3287	66.8092	103.291	95.0524	102.067	99.8032	98.3045	99.6522	97.1114	97.6837	95.325
0.366667	105.316	101.247	97.0604	104.196	98.0592	98.6347	68.4621	107.412	99.4223	101.532	100.92	98.147	103.399	106.733	109.338	95.055
0.4	105.136	102.926	94.31	100.053	98.4237	98.9549	69.4143	104.737	100.814	103.145	98.7386	110.366	110.578	98.898	105.847	102.345
0.433333	104.876	104.274	97.454	101.879	96.9991	99.6905	68.8009	104.382	98.7613	102.343	100.219	96.7668	102.599	97.811	93.8949	103.275
0.466667	104.837	100.642	105.579	103.296	101.675	98.9034	69.4019	97.3041	98.3532	103.978	99.7888	93.9043	96.5286	101.978	90.5117	92.8617
0.5	104.38	104.931	94.4958	102.678	100.679	99.6534	68.682	99.2938	100.426	102.133	99.7145	97.0945	91.2525	98.988	89.5756	91.5862
0.533333	104.197	103.064	99.4279	104.583	93.2326	100.623	70.4599	103.401	100.969	103.075	99.2852	90.2829	92.3832	97.6842	91.8192	90.7791
0.566667	104.05	98.9484	103.365	100.281	98.1686	101.945	68.2349	100.039	99.2094	101.57	99.1999	96.5854	90.468	101.76	96.1745	92.687
0.6	104.041	100.25	101.456	106.75	100.033	101.51	68.6597	97.1969	102.101	102.284	100.442	93.9283	99.4378	104.957	89.3984	96.1911
0.633333	103.501	103.521	103.768	104.346	100.106	100.707	67.9845	96.5753	102.405	102.348	101.461	98.2784	91.5759	101.824	101.571	94.2051
0.666667	103.394	103.202	105.013	106.396	100.592	102.532	70.3363	100.542	101.784	101.378	101.628	107.036	92.6493	106.606	106.319	97.1387
0.7	103.39	103.328	103.974	104.799	97.389	99.3497	70.4204	98.1058	101.234	103.491	98.3176	157.71	98.7305	66.4232	100.031	108.587
0.733333	102.791	103.346	101.573	106.815	101.121	98.7623	70.4428	95.9677	102.731	101	99.6592	2.27743	50.3442	2.20536	5.2936	52.6955
0.766667	102.129	103.501	106.694	103.002	100.813	99.8744	70.1436	97.5422	101.323	99.5531	101.512	0.904962	1.65905	4.18816	9.10424	3.43663
0.8	101.933	97.5885	101.368	102.728	99.7614	99.8797	69.2777	100.099	99.0041	100.261	101.73	3.19293	0.035003	0.68378	5.93213	3.22414
0.833333	101.841	97.8341	107.003	104.198	98.3985	99.4527	68.2141	104.55	102.483	99.7331	100.965	2.15944	4.74267	3.94409	8.56678	2.621
0.866667	101.784	100.355	104.993	106.624	99.1263	96.8382	68.376	100.317	101.86	100.473	101.337	2.77075	-1.32735	3.76882	8.53974	3.34762
0.9	101.662	104.976	100.225	104.739	100.141	100.717	70.7385	99.0839	101.882	102.104	99.9008	2.42255	-0.49282	1.17699	12.9863	4.10047
0.933333	101.436	106.631	101.473	102.017	99.5788	97.7582	69.0726	95.2717	101.94	97.4986	101.024	3.55809	2.28522	11.0317	7.59967	5.08224
0.966667	101.325	103.18	100.474	99.4611	99.7094	97.683	69.7584	98.5565	101.26	94.7099	101.167	3.68762	2.03019	1.98237	8.37593	3.83354
1	101.072	107.56	98.9167	102.604	98.3023	98.9337	70.8146	93.0195	101.671	96.049	103.215	2.53151	2.12631	3.81147	9.57137	4.83959
1.03333	100.886	106.948	104.59	114.058	98.9503	100.02	70.1066	108.262	101.299	96.7077	101.825	5.04752	3.25698	5.174	10.8099	3.37251
1.06667	100.826	99.1036	101.738	94.5763	99.9777	100.071	70.2147	94.9732	100.43	96.5937	99.7629	5.49199	6.10669	0.890498	7.1792	5.19186
1.1	100.536	96.7919	108.463	96.0821	99.5556	97.8176	68.7345	98.0733	104.085	96.9731	102.018	6.97813	2.68637	4.60647	10.9196	3.84482
1.13333	100.395	103.187	104.736	100.739	99.552	100.258	70.0018	97.2995	102.075	96.6561	99.0061	4.80702	3.64757	3.91767	9.75858	5.86477
1.16667	99.8694	100.031	100.781	98.8117	97.2642	103.776	67.7377	96.1346	65.1075	97.8334	98.7775	4.65947	1.164	6.71633	12.3016	3.42168
1.2	99.8204	114.092	98.6412	98.0248	99.9861	101.384	69.8244	95.4102	65.3271	95.8795	103.148	2.8303	8.11633	3.7318	11.7574	7.8364
1.23333	99.7262	106.235	102.715	97.4933	103.177	98.8091	68.5117	96.9562	64.2966	96.0203	102.466	4.5573	8.89918	1.87136	9.0097	7.12904
1.26667	99.5539	99.6716	97.0565	102.67	99.7961	97.5738	70.1676	96.3281	62.3616	95.9778	102.271	4.30438	1.56959	1.22439	9.93036	6.02723
1.3	99.516	100.29	97.7232	100.784	101.817	99.3654	69.7036	98.7893	64.5508	98.1542	101.608	3.99443	9.64091	5.06769	13.0019	6.29759
1.33333	99.4138	97.1587	100.596	101.245	102.414	102.487	71.8959	88.3882	63.2332	98.4374	98.6363	4.07253	-0.29669	6.58403	10.3688	6.29833
1.36667	99.2794	100.552	95.6677	101.724	102.409	100.958	69.556	100.975	64.1501	98.0909	98.0834	4.07573	4.1954	-1.11322	9.38058	5.48307
1.4	98.1916	101.505	98.3833	103.482	97.6554	100.411	70.6173	37.8038	65.1786	98.008	98.0005	3.49237	11.6611	1.781	13.9396	5.14808
1.43333	97.8475	103.3	100.868	101.936	99.3531	100.515	72.1981	39.7844	65.3824	97.6169	97.6094	3.66838	8.92307	8.57197	14.9062	4.66131
1.46667	97.8382	101.627	96.6108	99.3301	97.7095	98.8415	70.0894	38.647	63.3498	96.1997	96.1922	4.0768	9.93205	2.035	13.5118	5.25084
1.5	97.7083	98.3062	97.8715	102.714	98.7135	101.857	69.7626	39.0787	64.722	96.5264	96.5189	1.31658	10.3771	3.48287	10.088	5.15189
1.53333	97.3178	98.3035	97.5751	99.8322	97.3071	102.228	70.7121	39.2812	64.5665	98.314	98.3065	4.00943	6.29282	0.349669	11.6313	5.26224
1.56667	97.2595	96.3259	98.7603	101.996	96.8895	101.46	71.2802	39.7747	65.1458	96.8235	96.816	3.26331	4.46098	2.0623	18.1169	3.91961
1.6	97.2469	93.6743	103.968	102.941	98.9255	96.567	71.401	42.0985	65.2595	97.6609	97.6534	5.37381	10.5193	2.21568	15.1996	5.01198
1.63333	96.9217	98.0134	102.147	98.0129	98.9343	100.538	69.9069	41.4003	65.18	98.3026	98.2952	4.63722	12.2028	4.76547	13.1331	5.91737
1.66667	96.8378	100.049	98.8443	96.699	100.147	101.51	70.7169	41.8347	65.0307	34.313	100.101	5.09987	12.0856	3.19632	14.8521	6.46263
1.7	95.4096	101.788	102.776	97.7061	98.1124	100.693	69.4561	40.449	65.4732	37.926	51.777	4.11688	4.60655	2.41214	11.9258	5.62469
1.73333	95.2728	97.2777	98.1597	104.442	96.3608	95.6896	69.792	39.0167	64.9634	37.836	53.8754	8.31473	7.26736	11.4665	10.5158	6.05396
1.76667	95.0726	104.51	94.5624	98.7374	99.2158	95.3045	68.9026	40.313	62.9254	35.767	53.1636	6.88691	3.63312	3.41391	16.2036	5.13533
1.8	94.9822	98.3099	91.9358	98.7763	101.005	96.7268	69.0402	38.4669	65.0857	36.498	54.5332	6.08744	11.0083	1.29368	13.3842	5.82994
1.83333	94.0679	99.4702	101.764	98.2968	99.926	97.8039	70.33	39.5211	64.7798	35.772	54.7789	6.32173	14.1419	2.86271	9.97998	6.03569
1.86667	94.0337	99.2455	93.8362	106.135	99.041	100.949	69.3539	40.4562	66.9317	37.642	56.8814	5.53909	9.35589	0.795	13.0441	6.2407
1.9	93.1554	102.001	103.438	99.9542	98.0873	101.301	70.1682	40.9712	65.6856	36.683	54.8485	4.58041	8.6336	-1.63821	11.4777	6.15487
1.93333	93.1097	102.711	98.6211	103.351	99.181	99.864	70.3073	39.5628	66.3377	39.021	58.2565	10.656	14.0713	1.79699	14.8133	5.93269
1.96667	91.7878	101.872	101.62	102.002	99.901	99.6664	69.8921	41.8082	63.3757	38.093	56.6221	5.48733	13.4707	7.3211	14.8361	5.19934
2	91.6891	100.726	97.5737	102.237	99.6823	99.8545	68.9297	40.0097	66.4889	35.664	54.478	6.45657	10.5888	2.09921	15.4038	5.41649
2.03333	91.1898	99.5559	96.2074	99.3873	99.2222	98.3029	71.2623	39.9451	65.5641	36.49	56.6774	7.09423	11.2083	2.64528	16.4976	6.08915
2.06667	90.6462	105.702	99.0924	99.5771	97.8197	97.632	71.6308	40.8719	63.8649	39.493	55.3753	3.78469	6.04613	4.4051	14.3192	4.78355
2.1	90.0553	97.4212	104.13	103.509	95.7677	98.3778	73.3518	39.9434	67.0155	36.119	54.4008	2.41661	6.38894	3.96517	10.5589	3.82434
2.13333	89.1536	99.4792	100.795	99.2392	100.609	96.4825	69.3275	39.1632	65.8971	37.52	56.2597	5.55393	7.34625	8.37049	14.8449	5.18928
2.16667	2.056	0.801226	1.68575	102.086	98.2677	97.7679	70.9427	41.0219	67.2287	36.891	55.9936	5.07856	3.85259	10.4593	11.6028	5.48417
2.2	2.44581	1.18325	0.159205	100.495	99.0118	98.5134	70.7728	40.2442	64.9339	36.746	59.6602	6.19522	10.1721	-0.47716	15.2483	6.60805
2.23333	0.912131	0.262973	-0.41752	99.5958	99.0345	98.1347	69.8642	39.6278	64.6602	35.664	58.7464	8.03711	9.45312	9.32978	16.2502	5.40472
2.26667	1.38543	0.768574	0.72193	101.132	98.3506	96.6126	71.2007	37.4279	65.9103	37.22	56.5409	8.14677	7.77351	5.07833	16.7187	5.29179
2.3	1.06312	1.46908	-0.66108	105.781	98.2808	94.3886	73.1262	41.4767	65.7108	34.576	57.7692	7.4154	13.1662	3.99187	16.7488	5.76263
2.33333	1.30466	2.77541	2.13406	104.013	98.0044	94.2507	70.8659	40.206	65.5998	37.752	56.4549	7.90806	0.041671	3.80628	16.4758	4.86889
2.36667	1.40098	2.45868	0.822157	103.742	100.67	96.6785	69.16	40.9097	66.7977	35.641	58.0934	6.77413	12.1739	1.622	19.1747	6.3155
2.4	2.41185	1.50374	1.33505	104.663	99.2276	93.6127	71.7734	42.3969	65.2932	38.767	58.2592	5.7002	10.2093	5.12638	16.2153	6.26105
2.43333	2.06306	16.3119	1.06591	99.4696	98.736	96.1717	71.4041	40.2361	66.7443	36.089	56.8944	6.57158	5.0277	2.6455	14.1226	4.74039
2.46667	1.09478	-1.01597	0.816184	106.976	99.3967	94.3229	72.9758	39.7301	65.5264	35.917	59.5817	6.85198	2.16187	3.03738	19.6004	7.04701
2.5	0.643727	-0.68041	0.712225	101.314	97.6627	92.9284	69.8773	40.862	64.851	35.854	56.5511	8.15335	6.5934	5.8682	19.4401	6.28717
2.53333	2.19717	0.26247	2.06724	100.438	99.7595	95.6666	70.5383	40.9398	65.2519	36.779	59.6356	8.74598	7.4057	0.508833	14.0504	6.27209
2.56667	1.60223	0.655046	1.70777	101.21	93.7858	94.321	71.5736	40.8987	65.1342	37.014	61.1737	7.93315	9.75648	8.87948	16.5121	5.49055
2.6	0.530342	0.684181	3.40901	104.221	95.2718	94.4413	70.1266	40.7775	65.1067	38.436	60.9758	10.3235	5.80444	2.58184	14.8585	5.09021
2.63333	0.711068	2.00357	1.51385	101.954	98.7928	94.289	70.5316	40.5869	64.5928	37.671	58.1527	7.38239	8.97307	4.33106	14.2078	5.94618
2.66667	3.30512	0.882353	1.43658	102.838	101.151	96.1175	71.0596	39.9046	63.7094	38.015	61.04	7.30421	8.3758	3.4405	21.8064	8.92804
2.7	2.0669	0.902949	0.855565	104.165	99.3101	95.5003	70.5843	40.8311	66.3334	35.252	59.8847	6.6552	8.68305	2.84693	14.5431	8.27757
2.73333	2.33319	1.80113	2.63557	101.143	99.3121	94.5174	71.285	41.7574	65.6046	35.116	58.3056	6.40213	6.54062	4.69165	15.8108	6.75531
2.76667	1.84147	1.34726	3.22386	104.665	99.1507	94.0285	69.513	39.4341	67.3796	37.543	60.3371	7.9293	7.28236	0.105927	18.0392	7.63863
2.8	1.88483	1.25132	2.19341	102.864	98.9896	93.6712	70.3224	41.2266	64.675	36.157	60.7418	6.99237	7.1329	-1.37329	18.5404	7.12561
2.83333	1.79792	2.04677	2.57678	101.584	98.5349	95.4316	70.5399	40.3767	66.1636	38.408	59.1893	6.0853	4.78879	0.758198	20.3449	7.45704
2.86667	2.93657	-0.19566	2.91161	100.829	100.548	94.5442	69.7756	42.349	64.1501	37.387	60.9308	4.19095	-0.91453	-0.57266	16.7339	7.05486
2.9	3.20709	2.26453	2.59731	103.198	98.3736	92.1158	69.5632	39.5021	65.708	37.071	61.0632	4.44761	1.204	-1.43673	17.748	7.76369
2.93333	1.67609	2.10855	2.83303	95.7013	98.7387	91.6519	68.6122	41.3598	64.43	36.454	58.5403	5.47004	6.27837	3.98117	17.745	7.2801
2.96667	2.59104	0.187371	4.37283	101.515	95.4923	92.697	71.337	40.8045	65.6637	37.062	58.5635	5.76497	6.29726	-2.80958	23.078	9.94083
3	2.68563	2.60863	3.55272	101.18	97.8364	93.2825	71.4861	38.0024	64.9668	37.275	58.1343	4.82738	3.6559	3.93902	17.4762	8.21786
3.03333	2.71134	2.34943	2.9956	102.321	97.7533	94.1165	69.2775	42.265	63.878	38.019	59.7113	3.85966	6.20114	-0.84813	10.2589	6.68469
3.06667	1.82075	0.812779	3.55049	102.843	98.7321	94.3462	70.4402	40.3439	64.4467	38.47	59.4643	5.55178	6.55951	3.53082	14.1557	11.3096
3.1	1.29661	2.14497	1.34811	101.222	101.536	92.6372	70.2481	39.8715	65.9255	37.576	56.487	6.51624	2.61469	-0.30211	16.7891	7.20899
3.13333	1.16423	3.4827	2.37931	100.114	98.9214	92.1608	70.1792	40.0618	64.8135	36.812	57.0008	5.12129	6.57729	6.17599	15.2457	10.4155
3.16667	1.08231	2.82991	1.66802	96.9917	101.236	96.3568	70.3681	40.4159	65.3779	35.833	56.1076	6.3166	2.95139	-1.91876	15.9097	8.35764
3.2	1.29143	0.679912	3.37635	101.683	100.904	93.2808	71.049	41.8126	65.458	37.919	59.1654	4.81431	10.3177	3.67343	15.2035	8.40644
3.23333	1.23042	0.457879	2.78973	98.4799	98.5857	95.4895	71.0876	40.34	65.8351	35.887	61.4037	6.07329	11.6006	4.69137	17.727	7.31958
3.26667	1.43954	2.85905	3.9023	100.585	99.5029	93.2944	70.1237	38.3588	64.6929	36.238	61.1355	5.8114	8.78194	6.84907	19.2105	5.99118
3.3	1.90344	4.57176	2.8168	103.736	98.5322	96.7849	69.6842	41.5062	65.7262	38.136	59.4438	8.33989	9.72592	4.45833	18.0659	5.52439
3.33333	1.22984	2.55312	1.48865	99.0861	98.1685	94.673	70.9748	41.0153	64.1097	38.044	60.0942	6.95196	0.405594	3.82233	20.2011	3.9765
3.36667	0.999041	3.1612	3.63205	100.224	99.551	95.5638	70.5873	40.2725	66.0933	38.08	61.2085	7.05597	14.513	-0.25423	16.3802	7.97287
3.4	0.522668	2.35068	3.4273	99.5954	96.776	94.9264	69.4971	41.989	64.2211	36.094	59.192	8.26283	6.13892	8.87397	20.0993	7.02923
3.43333	2.03217	3.49299	2.77909	101.597	97.4347	95.3665	69.9858	39.8648	63.708	38.627	57.9739	4.61722	8.69138	3.38732	19.4734	5.53162
3.46667	2.82818	4.24399	1.32478	101.227	99.715	94.7188	69.6037	40.3455	64.8596	37.212	61.1519	7.35692	12.774	4.46347	20.322	6.81356
3.5	1.04912	2.29919	1.74902	103.511	97.4102	98.0314	69.3663	39.7265	67.7677	38.474	59.886	7.2471	7.70962	4.55383	20.4061	3.65587
3.53333	1.69835	1.33747	1.92931	100.466	97.3093	95.0517	69.243	40.3553	66.6655	36.637	57.4649	5.64298	8.34857	5.17924	21.5082	6.4234
3.56667	0.945705	5.14919	2.61018	105.367	99.1304	95.2143	69.7784	40.6571	66.539	36.26	60.8769	7.35816	6.33616	15.453	14.8985	4.67626
3.6	2.12369	4.59286	3.02248	103.845	98.0895	95.9374	69.3102	39.9378	66.3849	38.056	59.6779	7.73095	5.24994	6.64245	22.9875	5.02743
3.63333	2.91528	2.29793	3.00978	104.948	98.4158	97.8528	70.1726	39.9404	66.168	37.784	60.0635	8.37112	8.43969	9.4783	16.7856	5.74338
3.66667	0.960094	2.52373	4.26215	101.98	98.4	95.806	67.9934	40.4568	66.0375	37.397	60.1726	6.83598	3.55478	8.24321	17.9307	5.91124
3.7	1.20087	2.76511	3.32017	105.105	99.5704	99.0632	67.8925	41.6426	65.3699	37.816	59.652	6.44954	5.7111	3.03241	12.4294	5.48809
3.73333	1.42265	1.85864	0.980242	103.595	97.377	96.2667	68.4724	42.4093	68.0516	37.577	60.3746	8.52652	13.1724	-2.24784	16.0381	6.98497
3.76667	1.80751	2.9138	3.22386	100.227	98.0898	95.823	66.567	39.633	66.218	37.184	59.985	9.36426	11.2116	6.56262	15.919	8.2951
3.8	2.6344	2.33837	2.24698	103.501	97.6789	93.1428	68.7279	39.2562	65.9453	37.875	58.4789	8.02957	16.036	3.17536	15.9888	5.37725
3.83333	1.98709	4.68931	3.32819	103.53	98.956	94.3746	67.196	40.7753	67.0678	36.986	62.3584	9.94861	10.906	1.19829	15.0107	5.31533
3.86667	2.7923	2.77666	0.859485	101.45	100.132	99.4309	69.412	41.162	66.7561	36.531	57.4171	7.00206	12.744	3.74791	12.5657	6.61762
3.9	2.36964	3.53418	3.06746	100.574	100.179	97.8122	67.4407	40.4599	64.6036	36.324	57.731	7.44606	7.94186	0.026427	12.783	5.00217
3.93333	2.18182	2.88818	3.50382	104.034	99.7049	93.1523	66.4871	41.1786	64.996	36.645	56.7299	7.12673	10.5582	1.11327	14.841	5.43071
3.96667	2.70999	3.25237	1.96011	105.198	97.1577	95.4698	68.0286	40.044	66.6974	37.116	59.3012	11.0558	12.4667	-3.9863	13.4906	7.16607
4	2.47094	1.84659	2.65908	101.177	98.0109	95.921	68.0229	40.8992	67.3455	37.612	60.4668	10.5126	8.61415	8.83684	12.895	5.8026
4.03333	2.24341	1.39524	2.174	102.971	97.1788	97.0609	68.5289	40.893	64.4983	37.606	59.6806	11.1365	10.3693	7.11405	15.0595	4.95705
4.06667	-0.39631	3.9358	1.09279	101.005	98.7591	93.6486	67.8311	41.6118	65.5918	39.676	59.3435	6.72932	6.49284	2.23157	14.6505	4.45997
4.1	1.23233	1.28121	4.88255	103.203	95.9471	94.9734	67.3258	43.0898	64.494	37.479	58.7744	6.3437	16.5766	9.28228	11.7191	7.19881
4.13333	1.0825	0.990606	0.613864	101.6	95.5166	93.4121	68.5479	40.9693	65.4127	39.007	56.7326	5.78983	13.8391	-0.73696	13.7736	5.92791
4.16667	2.37348	3.47164	4.15072	103.162	97.8238	92.5079	70.2995	40.0192	63.8768	37.714	57.5345	5.47237	8.95196	12.2722	17.0449	6.0661
4.2	2.81053	3.68061	4.53035	101.817	99.143	92.9336	68.7055	40.8064	66.1552	38.553	58.786	5.5528	11.6761	10.1519	14.1183	7.37991
4.23333	1.67513	2.79901	3.88999	103.864	96.0534	93.6548	68.3737	39.1085	66.4622	39.073	55.8162	4.52217	10.9888	8.20619	22.3429	7.80268
4.26667	1.82037	2.87185	3.40509	101.043	99.0438	95.0357	69.5556	40.0784	65.0508	38.627	58.4059	4.24716	10.6143	8.36017	19.8789	5.43145
4.3	2.16417	4.22238	1.73297	103.81	95.8363	96.513	70.2317	40.9551	64.9983	37.403	60.058	4.99037	13.743	4.70721	18.9525	6.87229
4.33333	2.25338	3.0331	2.7735	101.114	96.8127	98.5239	71.0175	40.3481	65.5963	36.12	59.669	5.11413	10.9122	6.27127	17.4569	6.18602
4.36667	3.18829	4.94901	1.98811	101.428	99.9931	94.6645	69.2388	41.3408	65.3671	37.855	60.3965	4.97201	12.5706	-3.39786	14.5318	7.1055
4.4	2.73839	3.49651	3.04805	99.0686	96.7748	92.174	69.161	40.1476	64.5283	39.013	60.9874	3.40407	11.1411	5.52383	17.1753	5.83718
4.43333	3.18656	4.11011	0.809465	100.316	98.547	94.2223	68.7304	40.1988	65.8391	36.771	58.9143	6.02522	11.0077	0.736794	17.5402	7.11433
4.46667	-0.04541	3.69217	4.04732	97.9109	95.7093	98.2903	69.7967	39.2319	64.4774	37.456	58.9443	6.50438	10.8816	0.228126	18.9811	5.92767
4.5	2.73436	4.03677	2.6645	103.891	97.4997	97.2162	66.6477	40.8319	64.7817	36.875	58.0306	6.00721	10.8127	7.62807	15.5432	7.4086
4.53333	2.48476	3.55428	4.3075	104.019	97.5221	93.1363	70.2394	39.9474	62.8031	33.625	60.2238	7.36533	11.0211	3.44034	15.2957	6.36442
4.56667	1.11434	4.55342	2.52937	100.355	97.5039	94.8143	67.7127	40.9755	64.0236	35.875	60.7083	6.06584	10.7327	1.43144	14.4979	6.28251
4.6	2.84698	3.10418	1.23127	96.0704	98.58	94.2611	68.1414	40.7241	64.2427	38.554	62.5734	6.94127	15.2753	3.6736	15.3926	6.24634
4.63333	2.91508	5.41618	1.64543	98.4137	96.3223	95.6148	68.6253	40.8714	64.5863	36.338	60.7213	8.20813	8.09244	5.53972	20.3964	5.09475
4.66667	3.30723	3.01	3.55608	102.525	95.8232	96.9256	69.3676	40.0366	62.7676	36.798	59.1224	7.62982	8.17411	3.70554	14.791	6.11612
4.7	1.87485	2.7523	1.30257	101.746	97.0908	96.8316	69.3359	42.7901	65.0621	36.131	61.3164	6.90518	12.4573	1.47397	15.034	5.51495
4.73333	1.94891	4.62325	3.2052	99.6834	98.4687	93.4909	69.1108	42.4943	63.1307	35.405	61.7108	7.35245	9.61202	2.07792	18.6194	7.27127
4.76667	2.28542	1.72326	1.29417	101.61	98.0323	94.1484	69.0707	40.9873	63.3879	33.695	60.4954	9.72099	4.87546	-3.79055	23.8884	6.1317
4.8	1.68972	3.89285	4.46858	100.148	92.1329	94.8208	68.7375	40.1972	63.3317	29.412	64.4445	5.74876	11.6105	7.02412	15.3017	6.84409
4.83333	2.21328	1.31637	3.07921	100.171	96.456	93.0127	69.1142	40.4021	63.0912	26.836	63.049	7.02126	10.7038	4.40499	19.8387	7.21499
4.86667	1.56041	2.28714	2.39928	102.787	97.1658	93.8769	68.5471	40.4589	63.3468	31.265	59.7113	8.40167	5.0627	-0.68361	20.3578	5.85569
4.9	2.95077	3.67886	1.32908	99.0126	97.5317	94.894	67.9979	39.7813	63.7725	35.703	60.2832	7.15297	7.79629	2.74614	17.1693	6.46214
4.93333	2.06421	3.88682	4.54379	100.495	96.1779	93.2363	69.2141	38.8477	63.2507	36.559	59.7707	8.46519	10.1999	4.12412	19.821	5.50796
4.96667	2.48917	3.91295	2.52694	102.533	97.6972	94.6668	68.7929	40.6226	63.644	35.374	61.4385	6.70736	9.47923	25.2333	19.1517	4.39585
5	2.93676	3.97976	0.814318	104.214	96.8884	92.4778	67.5921	39.5217	64.3994	34.147	61.3689	5.09316	7.91631	1.01788	16.4908	5.55676
5.03333	1.7041	4.27337	1.41736	102.151	96.38	92.7011	69.387	39.7189	65.1964	36.961	59.783	7.53658	11.4489	7.55927	18.3081	6.977
5.06667	1.23828	3.01125	-0.89644	102.365	95.0863	95.4424	67.8057	40.2156	63.6798	36.848	58.728	7.90811	10.6749	8.61417	16.4585	7.48376
5.1	2.2058	4.38363	2.91198	100.793	97.1398	93.6973	67.561	39.8016	64.7779	35.799	59.4698	6.11312	9.13642	0.980973	19.1718	4.70986
5.13333	1.9351	4.9794	2.3179	100.925	97.9514	94.9573	68.2004	40.137	64.0502	36.931	60.1419	8.88186	9.46312	8.19549	16.5377	6.99625
5.16667	2.05807	2.7646	-0.0153	103.579	95.2819	94.0628	68.1453	39.7082	63.8655	37.51	59.2589	3.94549	20.1336	4.27776	14.6788	7.61925
5.2	2.6438	3.6138	4.13897	99.0106	96.1846	91.4539	69.0231	39.8552	62.9661	35.056	59.3899	7.01309	8.41413	10.9203	13.9718	6.37435
5.23333	2.78923	1.34676	1.99987	105.014	96.8888	92.1465	69.1411	41.1689	63.4797	36.665	58.2012	5.567	11.575	6.45173	19.2892	7.42282
5.26667	2.29578	3.48646	1.72158	101.189	93.6017	96.3231	69.6815	39.7065	63.0758	35.286	59.2562	6.30813	9.47757	8.46609	19.4013	5.01272
5.3	3.03461	4.91561	0.945527	100.648	96.6082	93.036	68.5683	41.4096	63.5613	36.361	59.1149	6.36151	10.5021	3.02679	15.4111	6.98669
5.33333	1.89864	2.6139	1.77198	100.753	96.6006	93.3412	67.9132	39.4434	63.0819	36.088	59.5612	5.21333	11.2983	14.7372	17.7804	7.39193
5.36667	2.78347	4.42985	0.254393	102.281	96.6289	92.4662	69.9809	38.4975	63.8398	36.404	56.691	5.82818	11.1733	9.94471	20.486	8.81891
5.4	2.42663	3.37042	0.164431	103.7	94.1309	94.9474	68.2886	40.0264	64.8917	35.67	59.0112	6.04155	16.7244	14.0056	16.7617	10.005
5.43333	2.88343	3.24358	2.6686	102.65	95.8496	92.3697	67.8331	41.2353	64.2948	35.972	59.0624	8.35249	21.3937	14.9918	18.1626	9.91729
5.46667	0.806228	2.72367	3.12569	102.097	95.121	92.9867	70.2234	40.5238	65.7899	36.731	57.0459	8.64107	16.9633	18.607	18.5825	7.70459
5.5	1.88291	4.30225	0.318784	101.722	96.0647	95.0298	65.4871	38.6675	64.5818	35.482	58.7116	8.1579	18.1206	20.8758	18.7827	8.5857
5.53333	2.10527	1.66524	2.10009	97.3225	97.5893	91.6007	70.4836	40.4808	65.2153	33.988	61.1123	6.73702	13.014	9.12852	15.5972	8.67263
5.56667	2.34375	4.26307	2.59768	99.1463	94.2168	94.4939	69.759	41.0618	65.6682	38.185	57.673	5.00315	15.437	6.65299	12.7285	8.22055
5.6	2.76697	4.71869	0.755339	100.737	96.7391	93.4298	68.0779	40.6281	64.8763	34.315	55.7247	7.3422	12.0517	5.97975	17.2022	9.25432
5.63333	0.609385	2.93741	1.39739	99.8632	95.2972	93.0109	69.4306	40.9481	64.5394	34.829	58.9327	6.15349	10.621	2.74619	13.9758	7.60393
5.66667	3.14992	5.09544	2.64397	102.171	93.8391	95.3628	68.0563	40.976	61.9205	35.041	58.425	7.01808	12.8412	4.88237	14.9865	7.17392
5.7	1.27473	3.5156	0.103026	103.031	95.6323	93.4025	68.4979	40.0778	65.3182	35.55	61.0414	5.47465	17.1805	2.34334	18.6349	8.86342
5.73333	1.99822	3.30311	1.1527	101.904	94.1544	92.6948	68.9254	40.0597	66.9993	36.265	60.1624	5.86852	14.6425	16.5767	16.8345	9.95947
5.76667	1.77164	3.92274	1.88844	103.469	95.5297	93.2911	68.2364	40.2986	63.9881	35.863	60.6073	8.85927	20.0208	15.1345	17.0012	8.54941
5.8	2.42624	3.50078	1.39141	101.281	95.5483	94.0286	69.7148	39.4307	65.4034	34.051	59.5162	7.44752	16.4299	19.0737	19.2523	9.7818
5.83333	1.97155	2.39062	1.28447	103.817	96.2559	95.5845	69.5972	40.3021	64.6813	38.457	60.4142	9.92931	13.3124	9.87623	16.5416	7.90924
5.86667	1.14504	3.16723	-0.80685	100.422	94.5177	93.6014	69.9676	40.5605	64.4512	35.136	58.889	7.99059	14.5419	6.49383	21.0852	9.11809
5.9	1.05756	3.27046	1.02616	101.513	94.3184	94.8042	68.5719	42.618	64.8547	35.768	59.985	8.53359	19.6669	4.13487	20.9028	8.97954
5.93333	1.94008	3.58417	0.79472	104.378	95.4086	97.1508	69.3086	38.9496	63.3362	37.495	57.6935	5.79909	20.3208	8.23256	20.8124	8.77784
5.96667	3.59674	3.97549	3.31382	102.524	94.8714	96.3751	70.0647	39.4653	63.8519	34.788	59.1859	8.62947	17.7411	14.0218	24.9847	8.10591
6	1.57326	4.96609	2.4577	101.93	95.1837	95.5083	67.9554	39.9688	64.1007	36.468	59.9004	7.50702	15.3504	6.73746	20.3118	9.76758
6.03333	0.198434	3.74491	1.54819	102.095	95.1533	92.0913	68.3817	41.5636	63.7234	34.839	59.0972	7.02011	27.5626	2.57108	24.5839	12.0618
6.06667	1.79619	2.71663	2.32518	103.968	93.683	93.2391	68.335	39.1964	64.4825	37.292	58.5751	8.72944	21.1803	10.4645	18.2527	11.8548
6.1	1.2732	4.03602	1.83543	102.492	93.955	91.7747	70.1482	40.277	63.9485	36.382	59.2152	7.3641	21.7665	3.13845	21.0188	7.82758
6.13333	3.24009	4.37635	2.59488	105.362	94.6546	91.6181	67.5048	41.3577	65.0819	34.886	57.4328	6.20971	21.8465	5.71466	19.4621	12.1002
6.16667	1.17152	5.03215	1.29809	103.849	94.6337	95.6677	69.2173	39.7322	64.6039	35.282	59.7809	13.1385	14.7425	3.37667	23.5906	9.18455
6.2	1.31733	4.04883	2.72441	102.915	92.9104	97.4282	70.8337	41.6767	63.0899	37.641	57.9596	14.7052	17.2972	13.0512	24.9678	7.68718
6.23333	2.38231	2.81107	2.54019	101.781	93.307	95.326	70.0674	40.1396	64.0608	34.72	59.8362	15.9211	16.6927	9.13403	21.2442	9.43321
6.26667	1.7183	3.38976	2.03085	102.734	94.3153	95.9667	68.5701	40.3676	65.3599	34.212	55.6763	24.9422	18.1528	10.3796	23.9225	9.69131
6.3	2.32226	4.97463	2.49503	105.707	93.879	96.6081	70.2459	41.9824	64.7172	35.274	57.1346	34.365	18.4901	1.03399	20.6956	7.57658
6.33333	2.10316	2.19219	0.655299	101.675	93.0111	95.614	67.5627	42.8656	65.5953	36.775	57.5522	33.4215	23.1655	5.44963	17.7926	8.80407
6.36667	2.04119	4.51474	1.18013	103.655	95.819	97.365	68.7241	40.6285	65.2197	33.981	53.5977	15.9427	19.5502	17.2607	21.1444	9.02404
6.4	0.817547	3.80972	3.09825	101.605	95.2311	94.186	67.3191	39.8474	62.6779	35.827	56.7954	9.45233	18.3895	5.52377	23.0084	8.85459
6.43333	1.8666	1.70618	2.38062	101.854	95.0263	95.5445	68.442	41.2822	64.9497	36.951	57.6013	10.649	14.0741	13.6823	17.1515	6.57421
6.46667	4.66019	3.77757	2.909	100.393	96.5287	94.3432	69.7839	41.6168	63.8115	35.388	55.4934	29.5545	19.9919	1.35718	17.8474	6.59542
6.5	3.23299	2.74426	3.31942	99.152	95.795	91.5182	70.8368	41.4248	62.5958	36.432	56.7388	17.91	27.132	0.434738	18.3702	10.2252
6.53333	3.765	4.09554	1.6389	103.218	98.3656	93.9549	68.676	42.5198	62.4379	38.793	57.3837	22.9394	24.7301	1.8926	20.4706	9.55619
6.56667	4.10995	2.58125	1.72606	100.483	97.7138	96.3646	67.4947	42.1591	63.3622	34.676	56.6644	12.3321	19.8358	10.7558	22.6371	11.4452
6.6	4.50632	4.71367	3.14883	99.0496	97.6776	92.9238	68.6694	40.7445	64.0368	35.117	57.0868	11.1683	31.3208	1.12359	20.6215	11.6836
6.63333	3.68499	2.61039	2.31734	103.169	95.0321	95.482	69.7554	43.3499	64.6117	37.708	55.8339	31.0521	21.7571	2.74592	16.7615	11.5332
6.66667	4.3089	4.41051	3.51073	95.9284	97.9364	93.7559	68.0145	40.9768	64.3197	34.699	57.1987	22.0164	20.1397	9.22402	20.7015	10.2203
6.7	5.0932	3.93003	1.8737	100.011	96.9459	93.8491	70.1853	41.3279	64.1572	36.334	56.1615	19.463	23.8273	4.91442	19.7801	8.89322
6.73333	5.34933	3.657	0.959338	99.7045	98.466	93.8323	70.0332	39.7316	64.694	36.962	55.9513	23.0973	22.4082	6.47788	17.6109	8.641
6.76667	5.14136	3.85769	3.0305	97.9516	95.0177	95.2643	68.7124	41.9442	63.3451	34.279	57.6587	12.9127	20.1986	7.40567	21.3608	8.95109
6.8	5.35585	4.44743	1.82032	99.3256	95.7079	95.6597	70.1207	41.9634	64.1933	35.815	57.0035	12.8211	22.4143	4.9723	23.3568	7.13628
6.83333	5.7668	2.50465	2.02152	97.8816	97.9141	95.4507	68.9773	42.1771	62.7674	36.88	57.0575	19.2879	20.7325	3.33955	18.8708	7.1326
6.86667	4.96792	3.72909	3.85919	100.709	96.5453	94.5569	70.9802	40.9851	64.9064	37.286	56.2761	28.821	14.0919	17.149	19.9741	7.61705
6.9	4.4292	3.6138	2.24847	99.5079	98.2471	93.5666	69.2428	40.9496	64.5467	35.048	56.4549	17.1698	17.5267	-0.58839	14.5818	6.11024
6.93333	5.06078	2.93615	1.42277	99.7653	96.5582	96.1199	69.6404	40.6277	64.1209	36.645	59.7884	20.3874	23.2155	11.848	21.0099	8.57761
6.96667	3.61669	5.03341	-0.34342	103.819	96.3816	95.5434	68.271	41.4386	65.0751	35.575	58.4557	16.5007	21.2731	7.96206	19.5715	10.2891
7	4.46373	4.95881	2.73579	100.062	97.209	95.2999	69.8649	39.8659	63.8746	36.037	58.223	22.5895	28.7316	5.9958	22.4005	10.6272
7.03333	3.71991	4.24599	2.90116	100.359	95.9411	91.7317	70.471	39.8109	64.9754	35.78	59.3872	17.5711	16.8377	12.0599	19.0415	10.4963
7.06667	2.05059	6.22746	1.50135	106.553	96.6299	96.4031	69.2464	40.7869	64.412	36.847	56.4262	11.8927	20.1908	5.22139	16.0147	7.78674
7.1	5.21944	4.79002	-0.07018	100.332	96.5568	93.9259	68.9866	40.0795	64.0385	34.321	56.3402	14.6949	15.9443	1.26146	19.3506	8.96286
7.13333	4.31619	4.7423	2.39891	101.657	95.2677	94.0248	68.9043	40.1893	63.4623	33.197	56.736	12.3015	19.0651	14.7953	20.1839	8.65252
7.16667	3.72759	4.53584	2.50249	102.401	97.79	94.4201	69.2749	41.414	62.3096	36.599	59.1238	9.46045	21.9154	4.49546	22.9993	10.6211
7.2	4.39601	4.14603	3.41218	103.194	99.0253	92.0995	69.844	41.7104	65.9097	35.502	55.6592	14.4054	25.2679	-2.34842	22.1822	10.7898
7.23333	4.78988	4.35098	1.47988	103.268	101.814	91.7456	68.8462	38.3857	63.7878	34.033	56.7463	5.01673	23.6961	6.14945	18.3565	10.1506
7.26667	2.42816	4.95102	3.19307	100.603	99.8852	96.6675	68.7924	41.1739	63.3428	36.338	55.0798	11.7554	23.6973	15.1136	21.442	10.2696
7.3	2.89628	3.05696	3.28153	104.379	98.7186	95.4054	69.9577	38.7803	62.9697	36.119	56.8971	11.2182	18.8729	14.1702	22.1774	6.93862
7.33333	4.56081	4.72095	0.324757	102.391	95.4301	90.6412	70.897	40.0204	63.4074	36.669	56.2045	16.7004	17.5167	25.3448	16.3804	8.20596
7.36667	3.86553	3.21168	1.49033	100.753	96.9817	92.6796	68.9978	37.6306	63.5662	36.159	56.9237	17.4405	21.177	14.1062	21.5229	8.88892
7.4	5.19489	5.22404	0.852206	102.018	97.898	92.3796	69.5798	39.4392	64.5282	35.048	57.3018	10.7944	21.1131	-0.86948	22.1445	9.80326
7.43333	4.43016	4.9563	2.04821	102.127	97.8453	92.6717	67.6825	40.9684	65.0681	35.784	54.5953	9.58577	19.0829	10.1995	26.0382	11.185
7.46667	3.87397	4.01542	2.87615	97.8939	93.8747	93.747	69.1708	40.3118	64.3007	34.438	55.0594	12.9193	16.1621	17.202	17.561	10.5119
7.5	2.70961	4.33943	2.30111	100.249	94.2167	93.5244	69.9817	39.2627	65.4424	36.363	55.5357	14.9457	18.2134	10.7826	25.3205	9.94218
7.53333	3.50177	3.94811	1.24845	102.207	97.1948	92.2114	69.7242	40.7848	64.3879	38.89	56.0912	16.4677	22.2566	21.0986	24.3543	10.0332
7.56667	3.48374	4.40473	2.54822	95.8068	96.6525	93.3521	70.9092	40.4694	64.9492	34.661	54.1982	12.6358	21.3131	-1.51596	24.0841	9.28166
7.6	4.62738	2.75732	2.44239	97.5061	94.6553	90.2001	72.0988	39.7254	65.3773	34.843	54.0467	4.766	17.6644	8.63541	27.8427	8.40975
7.63333	4.8225	5.46366	2.38547	97.6932	95.3455	90.6413	69.9613	39.7033	64.1724	36.09	57.1564	12.0806	11.4339	13.4068	23.8743	7.56616
7.66667	3.07049	4.27136	3.22703	99.7587	95.8968	91.4325	71.0439	40.6199	65.3541	34.024	56.0987	16.5095	13.1651	6.11773	23.821	6.64238
7.7	1.36376	6.54343	1.24023	104.933	96.6516	91.9124	70.4606	39.6126	65.9485	36.543	56.3327	14.6979	11.5216	11.9541	22.2007	7.52533
7.73333	2.03946	4.20706	2.92244	101.112	94.454	92.6832	69.582	39.7739	65.6411	36.284	56.1055	15.2918	10.496	2.90486	23.3769	5.78568
7.76667	3.11481	6.07324	2.54523	98.247	95.289	94.8589	69.3144	40.6662	66.1184	34.794	57.1359	15.5992	13.1935	11.917	20.3292	9.43247
7.8	2.53886	4.60818	2.88399	99.6895	94.8097	93.1904	69.8834	40.7326	64.8745	37.287	57.2799	18.124	9.25643	7.4267	24.6431	7.34533
7.83333	2.67469	4.35575	3.17795	99.1582	96.4155	94.8375	69.6116	41.6072	65.3822	36.486	56.3532	15.2143	14.8142	6.43043	28.003	6.90527
7.86667	2.18547	3.82905	2.58051	101.296	95.3908	95.0811	69.0894	40.2739	62.8375	35.454	55.3985	22.4633	13.4996	1.04426	23.9247	7.78662
7.9	2.76007	3.81173	2.50734	105.023	94.5499	92.3888	69.2518	41.0165	65.5575	36.598	56.8568	17.4316	15.0737	11.5355	24.5943	7.67909
7.93333	1.65173	5.89441	2.89593	98.2842	94.6843	95.6203	70.895	41.0827	64.3013	36.587	53.859	12.2418	4.73489	22.6518	22.043	5.50232
7.96667	3.47875	5.83739	1.50694	100.377	93.8784	91.4872	68.6095	40.479	63.9479	36.079	55.6387	9.2396	9.57035	11.7844	29.5486	7.90065
8	3.50273	3.38373	4.18712	102.468	97.254	90.2261	69.3268	36.8037	64.3488	34.53	55.6913	16.8496	10.6638	11.4875	32.5606	7.72581
8.03333	2.68294	4.83096	3.6425	103.352	95.3257	91.0301	69.6627	41.8948	64.6943	35.564	53.7703	12.8476	12.1706	16.1843	25.8115	8.78397
8.06667	2.76448	3.79992	1.54521	103.39	96.1757	91.986	71.1739	39.7218	66.1694	34.716	57.4573	10.4244	8.43636	23.6323	27.9676	8.97451
8.1	1.97711	6.62054	2.95528	97.628	99.3121	94.6325	69.5562	40.0602	63.3975	36.233	56.9995	6.74763	13.6213	4.43201	30.0816	9.81564
8.13333	2.9596	5.85774	2.1266	100.471	97.1455	94.5349	69.6611	39.0435	63.6621	34.617	57.4922	6.69097	12.7968	5.51864	28.4399	9.13244
8.16667	2.1728	4.67047	1.67921	101.572	98.6903	91.783	69.8038	39.9827	64.263	36.326	54.7032	6.59244	14.8814	2.09397	25.4345	8.67226
8.2	3.37035	5.99387	2.85991	100.854	96.6165	91.7304	69.8018	40.1654	64.2688	36.63	56.0141	3.60211	21.4687	6.19723	22.7463	10.8241
8.23333	3.04938	5.49329	1.97896	100.891	97.311	92.7545	69.3859	40.0004	64.355	34.862	56.4023	2.8918	13.1662	1.76019	28.3552	7.42393
8.26667	3.47664	7.1387	1.37462	99.887	96.9887	93.1391	71.4338	40.7293	65.1223	34.788	55.6258	14.2891	14.2213	8.88461	28.563	9.88835
8.3	3.30436	4.88848	2.56968	101.292	98.1856	94.54	71.272	42.2216	64.6648	37.09	54.162	18.0703	10.1287	13.873	30.2571	7.79631
8.33333	2.98128	3.38373	2.21506	99.3489	95.1398	93.4296	71.0829	40.1109	63.9642	35.588	54.667	4.76001	14.3525	15.4634	26.4832	9.67059
8.36667	3.17639	4.75486	3.06839	101.481	96.2937	92.7733	68.5924	39.9036	62.007	34.112	54.063	10.0096	8.03465	14.2653	24.8972	7.47972
8.4	3.61554	4.76641	3.12662	101.535	96.693	92.5563	71.2003	39.4291	64.442	36.278	55.6183	10.875	11.2916	27.3168	25.1158	9.42463
8.43333	3.22551	4.89576	3.04375	100.545	96.0239	92.2143	72.0005	39.6363	63.4957	33.429	53.5089	10.7049	7.85074	2.98474	24.7321	7.01562
8.46667	3.97182	5.55081	1.62807	99.0101	96.0948	92.3322	71.2993	40.2739	63.3838	34.412	55.9165	9.22162	13.5013	19.4394	20.9249	7.11249
8.5	2.93676	5.74823	2.76192	96.5849	95.848	91.3171	71.2439	39.0174	65.6663	37.355	56.2891	11.6479	10.7699	20.3456	27.9575	6.72098
8.53333	2.12983	5.15673	3.13707	100.687	94.5211	92.397	70.1216	37.8547	63.3743	35.222	55.2211	13.934	11.8933	5.37012	26.8289	6.66066
8.56667	2.97552	4.18571	3.52548	101.308	97.1097	88.9682	71.4491	38.8983	63.2485	37.467	54.3715	6.39248	16.4043	12.5586	25.1367	7.33319
8.6	3.23107	4.46978	3.96502	102.795	97.228	91.5659	69.2222	38.7413	64.4617	35.805	56.1567	2.56952	11.2627	5.96375	23.2301	6.04771
8.63333	3.20306	5.3873	4.61154	100.686	95.8637	90.8385	71.1452	39.4033	63.457	36.769	52.2629	11.4838	14.6542	2.30064	24.8955	6.65048
8.66667	2.39037	4.32737	0.178803	99.3837	96.6237	91.5734	71.8244	42.8732	62.8171	33.88	56.0188	6.37459	10.6043	15.1558	23.2041	5.36707
8.7	3.52863	3.22299	1.12862	99.6392	95.9542	88.9325	70.6768	40.1127	66.0199	35.723	54.2562	6.97447	13.623	7.71335	24.482	6.16934
8.73333	1.35244	5.01206	0.913984	99.0165	97.057	91.2987	72.136	38.7349	64.3177	35.73	56.1191	13.0834	15.1681	2.87822	26.7957	7.95252
8.76667	1.48884	3.65198	3.3756	102.817	96.8676	88.2509	72.3674	41.1527	64.1099	33.95	56.2659	12.6775	5.96112	26.8447	25.0429	3.4408
8.8	2.68947	5.28156	2.65666	97.1167	96.4506	88.2204	70.9824	41.0943	62.227	35.008	56.4406	9.05154	15.4159	15.5537	22.9052	5.91504
8.83333	1.87389	5.34661	2.65143	101.02	96.8337	90.1991	69.7382	38.485	61.7546	34.61	53.0968	14.298	12.4378	6.30807	22.4306	6.80387
8.86667	2.59258	6.30733	2.64135	101.965	98.7649	89.9307	69.9664	40.2793	62.923	37.074	56.3443	16.987	9.38422	18.4214	24.8533	6.98705
8.9	3.10617	4.97865	2.55494	98.533	96.3587	90.4205	70.4172	39.4383	63.7658	36.849	57.5843	21.3919	15.3392	20.8442	28.8287	8.84196
8.93333	2.25568	5.4732	1.9827	101.95	95.6916	90.6834	71.109	37.2034	63.8072	34.978	54.4049	15.5038	14.2552	2.65582	20.9421	7.23191
8.96667	2.44121	4.37158	4.53091	102.02	98.323	92.1921	68.5819	40.1928	63.765	37.271	56.1116	12.1135	12.8201	8.41286	24.8926	7.79288
9	1.59417	4.03074	2.4312	98.2817	95.4247	89.0692	69.277	41.9588	65.4547	37.211	55.4804	11.3107	15.0525	1.73371	25.7053	8.44482
9.03333	2.83412	6.51253	1.66372	97.7986	95.2135	88.0641	68.5865	38.5393	63.2444	38.001	56.8056	15.7544	8.52637	7.8243	24.4809	7.66548
9.06667	8.29851	5.27126	3.08556	97.4752	98.7973	87.8562	71.8665	39.0317	64.9667	36.465	54.7325	12.4179	9.48368	20.4941	23.9611	6.64263
9.1	1.82152	4.6981	2.62586	102.12	99.9585	88.9648	68.7254	39.4265	65.9988	35.464	56.1581	13.3132	11.6261	31.7592	25.4512	8.57466
9.13333	3.30954	5.34636	3.87972	103.715	99.2336	88.8104	70.7794	38.1724	63.7017	35.132	56.6808	14.0324	14.0219	25.3715	28.917	5.96519
9.16667	3.44748	6.62481	3.74515	100.239	98.84	91.4993	69.3695	40.932	62.2036	37.309	54.3961	6.46712	14.7897	7.57003	23.9069	7.04566
9.2	3.25237	5.65831	2.79179	101.445	94.0555	92.6772	69.7869	39.4946	64.5241	37.256	52.5904	11.2301	11.5478	12.267	25.892	6.39765
9.23333	2.69311	5.17833	3.64642	97.1364	95.4647	87.7381	69.345	41.0181	64.0669	37.062	55.1133	9.33804	10.0126	15.2514	32.8902	6.13905
9.26667	2.07016	5.29788	2.57528	101.458	96.8981	88.5301	70.0825	40.5687	64.3511	37.21	53.8576	10.8481	5.83166	14.387	22.5834	7.15626
9.3	0.51979	5.61285	3.10124	104.248	93.2608	89.272	69.9039	40.1448	64.2958	35.098	55.6708	11.6479	1.90074	7.71286	27.0374	4.11714
9.33333	2.20446	4.18521	3.2737	101.39	95.1291	90.9897	68.9887	39.212	64.8692	35.594	53.9279	7.2251	11.1988	6.3986	28.4529	5.74681
9.36667	3.08085	4.11664	3.55011	101.42	95.0615	92.0267	69.7428	40.3325	64.448	35.226	51.4494	11.2809	12.4445	6.32396	24.3617	6.5557
9.4	2.73589	4.25202	2.66711	100.496	95.4271	90.6981	69.8573	40.3273	64.6488	34.264	57.415	14.6502	4.64489	13.253	29.554	3.12973
9.43333	3.19231	3.85091	3.26772	102.585	99.6589	91.7828	68.7994	41.1774	64.9044	35.597	53.5594	13.9191	6.40616	32.7398	25.2375	5.73013
9.46667	3.36748	6.58663	3.51708	98.6653	99.6451	91.2196	69.7046	39.8314	65.5415	36.542	53.9696	10.7615	15.0514	16.9953	26.1098	8.65485
9.5	2.08724	5.94339	2.96032	97.3975	98.6449	90.9729	69.274	40.0858	65.8858	35.751	54.5646	7.59515	8.95529	7.48517	26.0897	7.23596
9.53333	2.92007	6.86367	2.31977	98.5857	98.8182	90.0582	68.0233	39.7507	65.623	35.073	55.8353	11.5853	5.24883	15.2459	27.7104	5.79451
9.56667	2.71383	4.75436	3.11094	94.2349	99.0079	87.2437	68.853	42.4217	64.7543	35.987	54.3497	16.1632	9.33977	21.6604	22.6455	7.09532
9.6	3.11788	4.77922	2.73617	101.806	97.5107	86.567	68.0564	41.0268	64.5958	36.381	54.1327	17.6734	6.72508	26.7816	20.7125	5.32404
9.63333	3.87589	6.43367	4.68135	99.9214	97.7628	89.6823	69.3071	42.1317	65.3617	34.706	54.4445	13.0893	15.3281	24.0617	17.7191	7.1391
9.66667	0.760183	4.04807	2.88697	99.9202	97.5669	89.4302	68.9857	40.5106	63.2787	37.236	54.5824	14.5636	11.6661	8.89002	20.5272	7.1044
9.7	1.35742	6.45803	2.39107	99.3901	93.7877	87.376	67.8983	39.9492	64.9119	37.024	56.4972	26.9726	14.028	9.01741	23.2735	6.46876
9.73333	2.08167	6.1084	1.77272	101.196	94.9672	90.0175	68.4229	44.6868	63.5197	35.763	55.8817	21.6097	12.5484	20.6425	22.2405	7.10035
9.76667	2.26297	5.61084	1.95339	100.33	94.4182	91.5679	70.1861	40.3077	64.948	37.531	56.4638	19.0252	12.814	9.16576	25.1693	8.64541
9.8	2.31708	5.97729	3.42599	102.792	96.8988	89.6647	70.0153	39.657	62.0837	34.531	53.958	18.9566	10.2904	12.2721	23.2328	6.16284
9.83333	3.67214	6.28096	4.29183	105.442	95.8464	89.4327	67.5654	40.204	63.2695	35.531	57.05	14.689	13.7541	17.4992	19.3733	7.98759
9.86667	3.54724	6.75265	0.550966	101.135	94.625	86.4816	67.9109	41.0775	62.4202	37.018	55.4804	16.5542	10.6143	18.4319	26.5827	6.27344
9.9	2.81417	5.11855	4.31385	100.074	90.7228	89.9522	69.1147	41.6635	61.5504	35.222	54.6683	19.2103	16.9405	13.3376	24.8665	8.30614
9.93333	3.39203	5.56136	3.10908	98.8544	99.6576	92.0206	69.3838	40.97	61.9405	38.171	54.4063	14.6204	13.1074	7.17225	22.3137	10.0191
9.96667	3.45842	4.50118	3.12121	102.122	96.2233	90.6992	68.8483	41.2881	63.4303	34.745	55.5296	15.6082	9.89205	3.43526	19.1489	7.369
10	3.05955	6.74913	3.30318	98.3071	95.605	91.119	69.2134	41.6391	62.666	38.014	59.0303	7.85187	11.2133	24.6183	19.8238	7.81973
10.0333	2.7192	6.30256	4.49862	102.477	97.1376	90.5856	68.8478	40.4885	62.4209	36.149	58.5007	5.24947	12.1273	3.66825	22.7076	5.80235
10.0667	3.74562	5.753	4.89188	105.445	96.001	91.2241	69.9648	41.1587	64.1532	35.785	56.0564	13.2863	8.9264	7.8088	29.9274	6.45859
10.1	3.55645	4.93947	5.21906	105.605	97.1605	91.3418	68.7891	41.492	63.3214	37.557	56.577	13.5101	11.1494	12.7547	28.6782	8.93209
10.1333	4.20645	3.79038	3.493	104.825	95.6513	89.569	68.988	41.3006	64.8031	37.768	55.0041	14.2741	11.7528	20.9397	30.157	5.83325
10.1667	3.6873	4.18697	2.49279	104.022	96.6408	88.3339	69.1039	40.239	62.2119	36.951	56.5846	20.2459	14.3319	10.8781	31.4816	9.38171
10.2	2.30537	3.78661	4.24125	105.373	94.2696	89.9115	68.5572	41.3133	62.9091	37.146	56.3471	18.9746	14.108	12.7654	29.6367	8.24692
10.2333	3.03116	5.98332	5.20376	102.349	94.7832	91.8932	69.2084	41.015	62.4659	37.286	55.6401	14.9248	8.9214	12.2882	22.4076	6.94181
10.2667	3.34599	5.22153	2.9062	104.115	95.3812	88.6474	70.5496	40.6596	63.013	35.386	55.2893	9.6783	15.0114	8.44469	28.9857	7.58284
10.3	3.49237	5.48953	1.73782	100.817	95.283	89.313	69.0293	41.2486	61.9131	35.708	56.3532	6.6551	12.9568	11.8638	32.746	5.16427
10.3333	4.12108	4.93168	3.62197	99.6752	95.57	88.4512	68.401	40.298	62.3462	36.025	55.8223	14.5696	13.1457	2.91016	27.4109	6.89938
10.3667	3.16526	5.93686	1.99203	99.6148	94.8502	92.2542	69.2914	41.5721	63.1638	36.881	56.9496	12.6149	15.2576	13.1364	33.4967	6.95812
10.4	2.81417	7.34541	3.25802	105.959	96.1087	91.7998	69.0729	43.2302	64.4255	35.948	56.4795	16.9183	10.8144	6.54712	31.6655	6.56882
10.4333	3.88855	4.36957	4.44245	106.655	96.6064	91.691	70.3059	40.3303	63.926	35.902	54.8765	10.6959	10.2843	16.5714	33.882	6.42474
10.4667	3.21188	6.42161	4.12422	106.945	95.3303	89.909	71.179	40.7189	61.8479	37.037	55.4627	14.4801	7.8013	19.6299	24.5136	7.08232
10.5	3.58811	5.60783	5.16718	106.446	95.3756	88.6459	68.7999	40.9794	62.566	33.948	53.6966	19.6759	11.7828	19.7151	29.4186	7.41375
10.5333	3.09159	5.1286	3.86442	102.456	93.0866	90.8573	71.1078	40.8622	61.7031	35.699	57.7979	20.8934	10.2849	13.9208	31.8925	7.01709
10.5667	4.2972	5.14065	3.00605	102.896	95.5472	91.4353	67.64	40.2964	63.1792	37.918	57.1257	24.3464	16.985	5.81005	31.7252	9.49145
10.6	4.98883	5.22982	3.51334	101.882	95.9767	92.0812	68.3216	39.983	63.6202	35.755	59.1893	19.07	9.94817	17.8699	30.6233	6.40648
10.6333	5.09359	3.58693	3.78696	104.108	97.2477	89.9823	70.2942	39.6399	64.1605	37.094	58.2053	16.0947	10.7982	28.7058	36.9727	6.57066
10.6667	3.70763	5.45763	3.67087	100.402	98.2926	90.1415	70.8311	38.0476	63.8523	38.783	58.7717	14.8232	14.6125	11.8056	36.7916	7.49958
10.7	4.31274	5.55282	3.10665	99.3548	98.0153	93.1892	69.1485	39.0532	63.048	38.098	57.9869	12.5343	10.7505	8.15323	33.9351	7.21193
10.7333	3.05667	6.01874	2.95622	100.954	96.2664	89.158	68.99	38.4396	64.57	35.871	57.4137	15.2888	14.3464	7.31039	32.5103	8.10088
10.7667	3.47702	5.57643	2.35915	102.677	97.7946	93.9789	69.6766	41.0851	64.1766	36.456	57.5897	12.4896	13.3696	8.36524	37.3644	6.09638
10.8	2.17875	5.89868	3.18261	97.7496	95.4196	90.4631	71.2897	37.7653	64.3185	36.136	56.9251	7.95629	13.379	6.29251	29.443	7.88251
10.8333	2.73474	4.94901	3.22927	101.566	96.1137	91.8619	69.2734	41.6122	65.0663	35.114	58.8119	12.0479	6.61563	14.1012	39.4397	6.16014
10.8667	3.275	5.17607	2.48047	104.367	95.4377	92.2653	68.707	40.0651	64.1701	36.614	57.4198	16.399	7.70518	18.2835	35.8194	7.33589
10.9	3.51194	4.80836	3.64679	101.157	96.8282	94.118	70.82	41.2052	62.6924	35.161	56.7415	23.2034	19.4335	1.55325	31.7398	6.96081
10.9333	2.92948	4.75059	0.307026	107.703	95.8791	93.9119	69.7773	40.3596	64.4413	36.633	57.9698	18.9746	18.564	9.02276	29.8289	7.626
10.9667	2.90108	3.84312	3.28676	99.5033	95.7263	94.6768	67.8157	39.9756	65.2597	36.948	55.2327	14.9517	11.6517	11.742	36.3986	7.62624
11	3.57641	4.43387	2.50454	100.939	95.6265	90.7209	70.4718	40.1924	63.7351	38.48	57.3502	14.2503	12.9679	14.0797	33.4632	7.8597
11.0333	3.97067	6.2154	4.22463	103.319	94.897	93.2537	68.3209	40.3382	65.0301	33.223	56.3341	12.021	16.4443	7.0079	35.9153	7.0193
11.0667	2.57589	6.14256	3.42823	103.252	95.499	91.104	68.9237	40.6923	65.0459	35.581	56.4098	11.2659	11.5128	27.8045	41.574	7.06173
11.1	5.1475	7.2909	2.58293	104.081	96.7876	92.077	68.7235	39.9669	64.5288	37.311	57.3891	11.448	12.3351	14.7899	31.7404	7.19893
11.1333	2.74798	6.49721	5.43575	103.812	96.1497	90.7056	69.0259	40.2147	64.1894	35.7	54.738	10.484	12.2556	28.1012	29.8757	7.15773
11.1667	3.98621	4.14327	3.93758	104.286	96.1982	92.8701	69.4601	40.6573	65.1398	37.172	57.8736	13.4206	13.8052	6.67964	31.3353	5.95918
11.2	3.64969	5.32777	3.05215	103.271	96.1688	92.2517	68.0891	40.1365	64.3628	36.938	57.3837	11.6748	9.04641	5.07844	34.9599	5.7972
11.2333	3.15279	4.87818	3.95475	103.026	96.6654	93.6901	69.8809	41.3408	63.9016	36.357	59.3142	16.5035	16.8349	9.35118	31.9551	8.15962
11.2667	3.49352	6.82624	3.57923	102.743	94.2798	90.7367	69.6567	39.843	62.6263	36.996	55.505	22.9706	14.4619	14.6313	31.5473	8.84245
11.3	2.83988	5.75476	4.07719	103.383	95.3477	90.9025	70.2605	40.899	62.8764	37.083	57.9494	9.62154	11.9095	6.50972	33.1262	4.97471
11.3333	4.38852	7.91154	3.60218	99.9266	94.082	87.4537	71.0921	42.7975	64.6688	38.138	59.0351	16.587	15.0098	9.00665	38.8405	7.73304
11.3667	3.40853	5.60682	2.74475	100.378	94.5282	87.8917	68.9963	40.1451	65.0423	36.912	57.5932	7.3743	11.6022	4.77114	31.7441	6.38391
11.4	4.5562	7.42603	4.87788	99.0463	97.4933	92.0426	69.1464	40.0291	66.4727	35.212	57.8095	9.24251	11.5733	13.5976	38.2669	5.78347
11.4333	4.21336	5.74823	3.57456	101.395	96.9415	90.6678	70.2311	40.8792	64.2565	37.546	56.2993	18.885	10.0393	8.05756	40.3754	5.95415
11.4667	3.52173	4.93947	3.76438	97.6683	94.3305	90.7651	68.2531	39.6968	63.1729	38.931	59.1088	16.3841	13.2001	3.13277	35.2292	7.72605
11.5	3.64605	4.41578	4.97251	104.767	96.1935	92.359	69.863	39.9957	62.769	37.906	58.1589	14.1847	15.7904	27.0463	37.8416	7.74162
11.5333	2.73705	5.56362	4.28436	102.454	97.4077	95.9622	70.4885	41.6518	61.8611	36.232	56.8186	22.2185	15.4431	6.28192	37.2995	6.4256
11.5667	2.72937	6.19883	3.7627	100.152	98.162	92.7692	70.5543	41.6812	61.883	36.955	55.2156	11.7136	15.722	-0.41863	32.1672	6.73447
11.6	3.89795	4.42206	4.09081	100.069	97.7601	91.739	70.8143	39.1917	63.7932	38.762	58.1514	20.3981	13.4529	16.2534	33.258	5.80223
11.6333	3.60864	4.34797	3.83978	100.012	93.8026	93.1421	70.1971	39.5136	62.4939	38.664	53.9682	13.931	17.9412	8.72583	33.6621	7.34509
11.6667	8.04507	5.58924	3.62141	101.283	95.7338	93.6835	70.1328	38.5984	62.9036	37.683	55.0464	11.9463	12.9935	8.5563	28.4372	6.04452
11.7	4.04395	6.21239	4.11974	99.6487	96.0775	91.9872	69.2789	40.3836	63.4401	38.672	54.5332	14.298	10.3215	9.65351	35.26	5.21822
11.7333	2.80861	7.0214	3.32577	102.439	96.1997	96.8326	70.3522	41.3324	62.3344	38.728	53.2687	19.9863	9.90927	7.82474	29.4919	6.33217
11.7667	3.91138	7.36927	5.89526	100.882	93.1298	96.062	68.9588	39.5676	62.6177	36.64	59.1845	15.2948	10.9649	20.1549	32.2237	7.84866
11.8	3.30532	6.6562	5.84767	100.633	90.3352	95.35	69.4513	40.5359	60.4632	36.232	56.2181	12.7313	12.1495	11.4236	30.1929	6.14089
11.8333	4.20645	6.3985	4.34577	104.67	95.1536	93.3963	69.7511	39.892	63.711	37.929	56.0489	10.0871	15.2364	12.2454	36.2235	6.53914
11.8667	3.16641	4.56623	4.84988	100.44	93.2097	93.5667	69.9563	40.8033	62.1587	38.218	57.4328	11.6151	10.7005	8.48155	36.6246	6.87633
11.9	3.91158	4.87391	3.24645	101.507	95.9622	92.1089	69.8736	37.8537	62.908	36.519	55.1501	10.099	17.1377	3.10629	35.6552	9.59984
11.9333	2.52428	7.41347	4.05498	102.454	92.8404	92.2615	70.7341	41.9037	63.3901	37.429	56.9571	15.3515	15.4592	5.05191	36.7277	6.46312
11.9667	3.35635	4.4311	4.28436	105.14	95.7021	92.2401	69.2298	41.9601	63.5268	38.721	57.3263	15.1844	13.4096	8.61412	37.2286	5.51519
12	4.35955	6.18928	5.33067	98.9559	95.4973	93.3449	68.535	40.3034	64.0366	37.252	58.6188	10.0871	14.023	18.3686	33.1514	7.17686
12.0333	3.47146	6.10489	5.08244	100.223	96.6272	91.1642	68.0876	40.0307	65.4978	38.53	54.5633	20.7353	17.5411	5.8314	35.1726	7.87576
12.0667	4.43706	2.8166	3.5055	104.736	95.322	94.7531	69.7185	37.9474	64.1662	37.98	57.2977	23.0422	21.826	12.4101	35.2976	7.9058
12.1	4.39773	5.75903	5.00293	95.1156	94.0874	96.918	70.1268	39.2363	64.5517	38.492	57.9739	14.674	18.0473	13.3427	34.6804	7.76565
12.1333	4.37106	4.14578	5.61306	101.716	94.765	92.8162	67.3999	40.8233	63.7248	38.229	58.8877	20.1176	24.2334	7.15642	38.462	9.72417
12.1667	2.79767	5.04119	4.18581	102.436	98.2818	90.9816	70.6127	40.7819	62.1341	36.48	61.1778	21.5381	18.4151	6.7534	32.9631	7.36189
12.2	3.99733	4.01467	5.67297	100.655	96.2095	89.9178	67.5686	39.0949	63.6443	37.714	58.831	27.1487	15.5615	14.9067	30.4242	7.56579
12.2333	3.52576	3.93304	5.12238	101.258	95.1898	90.4356	67.5121	39.4379	63.2578	38.539	56.2938	12.3254	13.1151	4.59631	34.023	6.05666
12.2667	3.00219	3.64244	2.19453	101.078	96.622	92.5574	70.199	40.0684	63.6632	38.502	57.3802	16.9959	18.8079	0.546016	37.1349	7.54495
12.3	4.57021	5.33933	3.63559	97.4419	95.2701	88.5146	69.6655	40.5731	63.0792	38.863	55.9035	17.5659	15.4737	0.46122	37.9396	6.55974
12.3333	3.36767	6.52333	3.42543	101.997	97.6342	92.9247	70.1989	40.7273	64.165	36.383	56.4201	7.62203	10.7182	12.6218	29.6848	8.56253
12.3667	1.603	4.38866	4.04676	103.172	96.2146	89.4594	69.0814	40.1272	64.3545	39.217	54.1763	9.73796	22.016	8.27526	39.026	9.3144
12.4	4.22295	5.56186	3.04711	99.057	93.8295	92.7113	68.8067	40.1933	63.7762	37.917	56.2802	12.5045	14.8909	10.512	29.1521	7.10194
12.4333	3.72682	3.91973	2.74643	100.652	94.069	90.3448	69.0865	39.6221	63.345	39.622	57.0998	15.9693	19.5135	4.99376	39.1744	8.25243
12.4667	5.14865	3.4081	3.85228	95.4326	92.9004	88.353	68.3177	40.8998	64.5657	37.135	55.4367	11.2301	20.3014	11.2119	33.9315	8.11854
12.5	3.65084	4.5597	3.46818	97.4066	94.835	89.0526	68.3773	41.1377	63.5783	37.526	56.4597	15.7275	17.8561	10.5332	34.0957	8.7641
12.5333	3.88318	2.24946	3.61488	101.041	93.957	90.7458	69.3109	38.5307	64.8544	38.131	54.9563	12.6745	15.1759	8.50819	37.3194	7.79545
12.5667	5.14922	5.36168	5.57331	99.9222	96.477	87.5399	67.325	39.4243	64.4116	36.972	55.0928	0.838619	21.302	14.0479	36.0082	7.74702
12.6	4.72542	3.47792	5.64013	99.669	95.3765	90.5122	69.0711	40.4519	63.8623	36.645	56.4085	5.0525	15.8726	12.643	34.1557	6.47489
12.6333	2.78136	5.50284	4.5996	101.875	96.4373	90.8423	66.6325	37.1463	63.9425	36.79	59.0317	5.21069	13.234	5.97986	34.4006	7.02175
12.6667	3.59195	4.34295	4.2028	97.944	94.901	92.5168	68.497	38.0416	62.6782	38.087	58.0906	3.60511	16.2199	7.52236	40.4615	8.2631
12.7	3.27654	4.67172	5.92886	100.999	95.9647	92.4617	68.0221	39.9865	64.4964	37.45	58.281	9.73197	18.6679	4.0503	42.2109	9.26241
12.7333	2.96708	2.6674	3.87524	98.923	94.061	90.0972	70.1983	39.6504	63.4957	36.732	57.6846	9.42758	22.8755	10.3533	29.5024	12.1189
12.7667	3.55473	4.73728	4.25151	96.7771	95.3101	92.7812	69.7696	39.5527	63.8543	39.948	56.8671	7.6549	17.5589	17.5788	41.5633	8.76226
12.8	3.67137	4.35575	3.35563	101.384	92.6155	94.3486	68.8916	39.8724	63.4284	38.198	56.5177	16.4169	19.9119	5.7412	30.7501	8.94717
12.8333	3.07471	4.94198	4.47977	92.0823	93.9313	93.7199	67.2153	39.9783	63.8298	36.314	54.2535	9.69619	26.9753	6.44594	31.9487	9.7319
12.8667	4.12434	5.42548	3.60965	100.734	94.241	92.6577	68.3795	40.9465	65.3585	36.573	57.1168	10.8631	25.0868	9.82327	30.8942	9.77052
12.9	3.66178	3.19636	4.77355	100.435	94.3012	87.3203	66.7325	41.6677	65.1534	39.271	55.4831	12.6835	19.1952	4.48978	37.4208	8.0397
12.9333	2.44523	5.11051	3.74608	98.7256	94.8398	92.1719	68.8335	40.1365	64.785	37.265	54.6506	19.4998	22.1666	8.57169	33.0406	10.0311
12.9667	2.08244	4.9151	5.02999	100.83	94.4984	93.2463	68.0077	38.9003	64.9843	37.202	54.2623	15.5425	25.0807	7.96245	38.3887	7.80084
13	5.11795	7.72417	4.42397	99.3811	95.1267	94.1758	68.7058	40.7819	65.1659	37.917	56.2788	6.44324	17.2766	9.57412	33.5876	8.1845
13.0333	4.23638	7.12362	4.10164	99.3091	93.8237	91.8549	68.1327	40.4196	65.6251	39.603	55.898	12.7313	16.2743	8.95374	37.666	7.58455
13.0667	4.21298	3.8175	2.9174	97.8908	96.2628	91.1977	68.3186	41.1081	65.1068	37.547	56.9087	12.0776	11.5378	7.95153	37.4051	6.7146
13.1	3.64931	6.58035	3.55944	100.073	94.2778	91.1388	68.2332	41.132	66.2955	37.199	54.9973	19.3446	21.1759	10.5121	36.5149	10.4171
13.1333	4.84111	6.27844	4.26028	104.126	93.0058	92.6638	69.7216	39.8566	65.8175	37.737	53.0326	12.5015	18.2023	8.22743	33.2716	7.59007
13.1667	3.80721	7.09675	3.38699	99.8073	93.5375	95.7453	66.8815	40.2399	65.9371	36.831	55.8496	17.1302	25.034	9.48398	32.6799	8.56964
13.2	4.34785	6.03079	4.09137	98.028	93.492	93.9789	67.1143	41.4524	64.0977	38.576	53.3527	13.9578	13.9269	9.19213	33.9125	6.89755
13.2333	4.05451	6.62707	4.51729	100.111	92.3288	95.4761	68.3511	41.9744	65.3214	37.474	54.8833	14.9397	14.0663	9.56298	39.2619	7.57842
13.2667	5.18318	4.16512	4.68956	101.23	94.5453	93.698	69.5342	41.1986	65.1465	36.359	54.9024	17.3869	18.8635	4.44212	31.1679	8.87924
13.3	4.22679	6.63611	3.58707	97.4866	94.4163	94.4535	68.2096	40.51	64.8849	39.94	57.4301	5.64939	19.1563	11.249	33.8591	9.3654
13.3333	3.48067	5.16376	3.50289	99.6823	95.5205	88.9736	70.1307	40.234	64.0252	37.884	54.7966	8.76803	20.1958	10.5601	38.3905	8.17359
13.3667	3.02713	6.25358	4.62965	100.838	94.7122	93.1207	68.7604	39.7521	64.1665	37.867	57.0397	13.0417	10.8688	4.6864	33.4209	7.491
13.4	2.91086	5.47647	4.59474	100.019	96.0256	96.6696	68.9522	40.8778	64.9856	37.296	57.2902	16.9601	13.5702	13.507	29.9989	6.64104
13.4333	4.55313	5.15522	4.9223	97.7233	98.7422	94.098	68.5154	40.8142	65.9334	37.621	54.9447	17.1809	13.4613	12.5317	33.2024	7.72335
13.4667	3.03634	6.63159	3.87561	101.005	94.6177	94.5682	70.5511	41.2039	64.3653	36.98	54.9304	16.5214	13.1924	14.7797	34.4521	8.07182
13.5	4.48905	6.11142	4.5716	94.9973	95.1486	93.6608	69.2815	40.3782	65.8715	39.787	56.1656	8.62183	16.686	9.32978	28.5559	6.49132
13.5333	2.83451	6.91164	6.01098	97.4549	96.6543	93.8275	70.4181	40.0579	64.0027	38.034	53.1984	12.012	14.0508	13.5443	28.2183	6.64312
13.5667	4.43419	4.55217	3.8032	103.151	97.3996	93.8223	70.6813	37.7148	65.5893	37.792	53.2469	20.216	13.144	6.05898	27.6548	6.58096
13.6	2.72285	6.07676	4.34912	101.88	96.5266	95.9181	68.7777	41.0202	66.1739	39.828	53.7621	15.4828	21.4732	15.6118	31.0496	8.46872
13.6333	4.63736	7.79073	6.00706	97.8474	95.84	91.1177	70.9438	40.8442	65.6592	38.144	58.2953	14.0115	16.9055	4.6122	33.639	9.6972
13.6667	4.59553	7.60109	4.89095	105.288	96.098	89.9161	72.5191	40.6631	66.2024	40.753	53.9259	18.1956	14.9664	12.3568	31.797	8.40864
13.7	4.10017	7.04451	5.55203	103.56	94.9073	89.8451	70.0285	42.0434	64.6055	38.169	56.6139	16.217	13.0607	0.296651	34.9855	7.22566
13.7333	3.89738	7.6016	3.92489	99.8834	97.3883	94.0293	70.5779	39.9751	66.6688	40.033	57.3161	19.3655	16.1143	1.22996	34.2364	7.221
13.7667	3.07106	8.1288	3.79517	96.9671	96.2621	92.5947	70.3354	38.7647	64.103	39.598	53.8174	1.55183	18.7357	21.4115	33.638	8.23343
13.8	3.32911	4.73125	3.78099	101.358	96.0092	89.2304	68.1499	42.7948	64.0527	39.022	54.0863	9.49923	18.2695	7.54338	30.9596	6.82189
13.8333	4.36569	5.79118	3.1423	97.2134	93.9608	91.5879	69.6652	40.1371	64.5203	39.001	54.7427	12.2985	8.06688	11.5301	32.362	6.50763
13.8667	3.97489	6.17446	3.83399	103.674	95.2546	92.6127	69.971	42.9114	64.9379	36.825	55.4886	17.6853	13.1951	9.29314	32.0508	6.32469
13.9	2.66913	5.63947	4.86295	104.572	95.2537	89.5445	70.9701	41.9637	64.001	38.804	56.3327	21.8365	10.0876	10.0295	38.1501	5.71836
13.9333	3.90352	5.62315	2.61933	100.39	96.5524	88.1713	71.1831	41.2598	64.632	39.415	56.8002	20.9472	9.50979	20.2449	34.6253	6.49071
13.9667	2.54596	5.83965	4.15166	100.124	96.3011	88.8989	68.2352	39.8796	64.0867	41.082	55.694	13.2535	10.6621	20.3243	33.6458	6.296
14	4.13144	6.09082	3.59379	99.5238	95.861	93.76	69.8401	40.4988	63.374	38.821	55.1631	14.9545	14.9181	22.3814	43.0678	6.02392
14.0333	4.80389	6.55146	5.18229	99.1054	94.0275	88.3033	69.3707	39.8043	64.267	39.755	56.3532	21.8515	10.286	7.77123	36.8946	6.48973
14.0667	1.58937	6.4736	4.77896	102.469	94.1169	89.5254	69.5419	39.651	62.9087	39.06	56.6337	19.5773	15.2787	9.32465	35.3268	6.65342
14.1	4.42862	5.63144	3.97342	95.0072	95.265	92.6156	69.5124	42.1033	62.8466	38.934	57.0704	18.7656	14.0435	11.5566	30.2291	7.86583
14.1333	5.09359	7.4632	4.47791	99.447	95.697	95.1017	69.7686	41.7828	61.0002	41.443	57.3065	24.5642	10.4649	1.74916	33.8487	7.61067
14.1667	4.54815	7.32983	3.7054	99.2973	93.8949	92.3391	69.9398	42.4409	61.1364	40.471	55.2313	30.3718	13.5763	15.1983	33.8049	6.82913
14.2	3.41448	7.04576	4.83701	100.726	93.6817	94.2976	70.0278	40.403	63.9724	37.511	55.071	30.321	16.0743	10.2204	34.5172	7.28795
14.2333	4.18228	8.40584	3.04039	100.162	93.7276	92.876	69.5468	40.5381	64.5528	39.665	55.0682	35.3944	10.686	10.0351	31.3516	6.94046
14.2667	4.50632	5.57718	4.31049	99.0664	93.5756	93.0942	69.264	40.0598	64.4455	40.609	55.2197	33.7143	20.8825	6.82231	40.1369	10.551
14.3	4.76782	4.7634	4.19216	97.3886	95.8052	91.3201	70.3587	40.5968	64.2312	39.574	55.4668	34.4693	17.9095	16.1312	35.8381	9.22047
14.3333	3.35328	6.16441	3.54768	102.225	94.2242	91.445	69.9671	41.691	66.9751	39.697	56.6118	32.8219	19.9074	8.45523	35.2765	8.87703
14.3667	4.95737	7.08218	4.40437	102.042	94.5898	92.934	69.3279	41.0226	64.1423	39.794	55.3651	34.9826	14.143	9.07545	36.0181	7.13983
14.4	4.30046	6.96388	6.11793	100.424	93.4298	92.4873	68.7557	40.3105	64.2272	38.3	54.9099	25.8445	14.5003	10.0405	31.9402	6.66409
14.4333	4.28109	5.25242	6.39845	99.9733	95.6158	92.6761	68.7569	40.9561	63.286	37.571	55.2238	41.2706	16.3032	14.2492	33.9894	9.07101
14.4667	4.52416	6.03632	6.78331	100.148	95.8185	93.0714	69.7187	38.7672	63.8878	37.273	57.9248	30.0017	20.947	-0.11663	38.6512	7.3842
14.5	3.99695	5.90596	5.6754	100.419	92.735	91.1509	68.4875	40.3611	63.5325	38.501	56.1191	31.1044	17.6533	5.61365	35.8233	7.94259
14.5333	5.28064	8.24936	5.87137	99.7455	93.4551	90.0047	68.9427	42.7408	62.3566	37.734	53.8372	22.5756	23.2683	4.21972	33.9624	8.0034
14.5667	5.94791	5.62616	5.2004	99.0906	94.0718	94.2278	70.7612	42.6397	63.8969	40.132	56.126	16.2982	18.6795	17.3769	33.7051	6.92489
14.6	4.98787	6.0107	3.45436	99.4873	93.9379	91.6517	68.2754	40.8415	63.6455	39.108	54.828	18.4641	18.3273	18.8456	31.9173	7.20531
14.6333	4.51112	9.25604	5.06098	100.876	97.1961	89.0008	67.8921	39.9925	64.6549	38.502	55.591	23.2843	17.2589	11.7789	37.8877	7.4205
14.6667	4.8695	8.7414	7.25551	96.3471	93.729	90.6823	67.9931	41.506	63.609	39.611	56.4767	16.3698	16.8155	6.32407	34.0329	8.31006
14.7	5.06135	6.49847	5.10913	98.3199	94.8582	91.6815	69.2353	40.9185	64.2873	39.325	52.8566	15.5636	16.276	6.34034	38.0606	7.01403
14.7333	4.39735	7.48581	4.69945	97.4131	92.3864	88.7735	67.0881	40.8452	64.741	38.498	57.0615	17.5872	19.8291	18.9941	35.471	8.92644
14.7667	5.24381	8.78083	3.77669	98.2382	93.4583	90.6922	69.5027	42.7399	64.6143	38.937	56.0127	19.5773	21.6787	3.80595	37.2054	8.99192
14.8	4.88965	5.58447	5.27916	98.4536	93.9064	89.3241	70.5295	42.1006	64.7923	36.715	57.3673	14.1947	20.697	6.49361	36.4169	6.97075
14.8333	3.19385	7.84473	6.37568	100.883	93.7672	86.6988	70.6593	42.5294	65.3419	39.859	55.288	16.5428	17.2894	5.14211	29.021	8.52648
14.8667	4.61625	6.52785	5.46356	98.7943	92.7915	90.7524	69.0156	41.8357	65.2505	40.255	58.3772	17.2458	14.628	7.3686	33.1191	7.36201
14.9	3.85555	6.28498	3.85844	96.5062	91.7348	90.5379	70.083	40.3492	64.5183	38.691	54.8035	17.8745	19.4657	13.041	33.9054	9.44155
14.9333	6.18946	7.1721	5.90217	99.8588	93.1069	91.6222	70.5091	42.1838	64.6494	39.368	56.2092	17.2776	13.3413	19.6248	36.7487	7.33111
14.9667	4.6082	5.37324	5.12761	97.1801	89.1063	89.0918	69.1647	40.1002	64.9985	39.1	56.4126	16.151	20.2869	12.4523	34.4004	7.68093
15	5.01512	7.81559	4.30489	98.4199	94.031	89.2647	70.9492	41.0343	64.8383	39.627	55.1221	14.5028	22.3682	4.94609	33.0397	7.42344
15.0333	4.57769	8.32119	3.36795	98.2082	93.5229	92.593	70.6209	42.9575	64.8058	37.858	56.2454	15.3642	18.559	12.2932	35.0282	8.95084
15.0667	5.62003	6.29577	3.36552	97.7192	93.935	93.1086	69.1432	41.1538	65.5829	40.773	57.1359	20.3689	15.5809	10.9309	28.5491	6.66421
15.1	4.5138	6.66298	4.45047	101.436	92.7593	90.2399	69.2913	40.691	64.7586	39.355	56.0168	15.4688	18.2234	9.57898	34.0915	8.33287
15.1333	4.42056	7.75757	5.16363	96.3937	93.0614	90.9248	69.2533	39.6707	65.8359	39.619	54.0235	18.1087	20.8553	17.6636	34.8523	8.08433
15.1667	4.33979	6.87472	4.5143	98.8052	93.206	90.5332	70.6665	42.2223	65.1187	40.128	54.8178	15.7782	16.3721	12.4153	30.0967	7.59056
15.2	3.90659	7.19923	5.37621	101.012	92.2417	93.1729	70.1472	40.2221	65.3484	40.313	56.8377	14.8974	14.1225	15.2088	31.9831	8.19579
15.2333	5.41417	5.82458	4.47847	100.292	94.0181	92.9821	70.4668	41.2521	64.1194	38.809	56.3082	18.3142	17.1055	6.09087	32.67	7.88324
15.2667	4.48407	6.47963	3.93553	95.472	93.8605	94.1816	69.839	40.8361	67.2798	33.779	54.5489	17.6237	14.3141	12.0391	32.6366	7.57033
15.3	3.5459	8.25991	5.32769	96.8699	93.0691	91.0648	70.5621	39.5386	65.857	28.156	56.8418	17.4597	18.7273	16.1632	36.1138	8.3764
15.3333	4.81962	6.398	5.36016	96.4648	94.9996	89.8822	69.1537	37.8145	64.8171	29.611	53.3076	19.6657	12.4717	16.2109	34.172	6.00197
15.3667	19.357	8.78083	6.36392	98.4474	92.8054	94.3681	68.877	42.3103	64.7182	30.518	54.6915	14.7426	13.4018	17.4512	33.3982	6.08621
15.4	4.27072	6.85035	5.86353	98.5844	94.9867	94.976	70.3925	41.5268	65.0761	39.661	54.77	17.2402	14.3886	18.13	32.0931	7.03708
15.4333	3.48029	7.56945	4.39933	101.998	93.6141	95.8473	69.4662	39.5281	66.1627	38.078	55.7479	14.8467	15.2626	10.9731	26.7625	7.57867
15.4667	4.2901	4.67072	5.22653	97.7213	92.6976	91.5454	71.1124	39.8843	65.2858	38.713	55.8612	22.1794	16.796	9.84429	28.7269	7.79373
15.5	4.06544	8.54247	3.83698	97.8285	93.6031	91.3199	71.4356	40.2938	64.6626	40.215	54.4472	20.5734	17.7072	5.24787	26.4022	6.45246
15.5333	4.29298	7.09449	5.19163	99.0973	93.1872	93.0754	69.3617	40.3034	63.8313	40.927	54.1122	17.4166	11.8556	7.692	31.5127	8.57638
15.5667	3.5154	7.3655	5.48428	95.3125	92.9631	91.9039	67.4336	41.0428	65.1681	38.578	54.5646	15.5983	18.929	14.4829	35.1883	8.02891
15.6	5.05387	5.82885	2.63743	97.7513	94.6999	90.782	68.6603	40.4963	64.2482	38.212	54.5987	15.2887	12.4351	10.5546	33.4082	7.66352
15.6333	4.48522	5.2901	5.69836	100.076	92.9771	92.6385	70.7552	39.5272	65.6263	36.496	52.5297	18.3954	18.854	14.3291	40.3865	7.27986
15.6667	5.98571	6.64967	4.21922	97.7106	91.4025	88.9604	69.4808	40.2429	65.279	38.938	54.3033	16.1821	14.7292	6.1548	32.3245	9.76586
15.7	4.43879	7.95524	3.52156	94.8119	92.6253	91.8727	69.4848	40.1304	65.0064	40.383	55.4483	18.6164	17.3155	16.3327	33.7992	8.01714
15.7333	3.36728	6.97845	4.68023	99.0325	92.2276	93.1745	67.4405	41.3361	66.001	40.914	54.6759	14.6867	14.4269	18.713	30.021	9.11319
15.7667	3.10771	6.51379	4.03389	98.7284	94.1436	93.8675	69.8027	39.443	65.4546	41.31	57.7501	13.7534	20.0964	15.2617	33.3389	9.46166
15.8	3.70974	6.59391	3.83306	97.6105	93.4707	94.9861	69.8319	40.4503	64.7987	39.144	55.2689	11.8409	6.31671	17.6317	32.3045	7.82451
15.8333	4.52436	5.86402	3.83511	94.852	95.2847	95.5873	69.7137	39.8786	64.7356	38.52	54.9229	14.3443	17.6417	18.8718	31.6928	9.24218
15.8667	5.28832	6.75089	3.51764	97.5784	95.5709	92.6031	71.113	40.3267	66.3946	38.629	54.0296	13.0292	15.8232	14.0694	36.5682	7.99482
15.9	3.83829	7.58452	5.0565	93.8979	95.2501	94.6566	70.4161	41.4882	64.0725	42.195	55.7288	11.1372	21.5298	15.8505	30.1411	8.95894
15.9333	4.23312	7.00985	6.13305	97.625	93.8233	93.9627	70.1221	39.4127	62.8545	38.842	55.1604	17.5345	19.693	15.3149	32.9559	8.49288
15.9667	4.57616	5.95268	5.58301	95.0419	93.699	94.0628	69.1349	37.4368	64.3737	39.249	55.4436	15.1988	17.1905	14.4616	31.3619	8.6578
16	3.09773	6.26136	5.45106	97.5531	92.7563	93.808	69.5549	40.354	66.0233	38.905	55.073	12.9606	9.12476	10.3691	29.4808	7.95117
16.0333	5.49552	6.31461	3.97062	96.6318	92.3249	94.3853	65.3914	39.8645	64.7365	36.56	52.1557	14.1674	14.5447	14.1697	37.0602	8.64786
16.0667	5.36621	8.58191	3.37038	98.9684	93.2007	99.2672	69.753	40.017	65.9477	38.007	54.1825	10.6433	10.4765	14.663	31.8896	7.30291
16.1	4.04376	7.60813	5.26834	95.2997	94.4807	95.4286	67.5756	39.0398	64.9512	39.341	55.3801	13.595	17.6661	11.5138	26.9726	9.72859
16.1333	5.03948	7.86784	3.75392	98.823	92.6023	93.2086	68.5757	39.4717	66.3402	38.58	53.0661	12.4348	18.5095	14.6154	28.4036	8.35813
16.1667	5.10932	8.05671	4.88124	100.082	93.509	94.0178	70.0401	40.0191	65.325	37.645	54.7236	14.9378	17.155	10.6286	28.3907	9.01338
16.2	4.90557	6.6562	4.34782	99.9497	93.2031	92.5152	70.656	39.7906	66.3134	39.618	53.8153	14.7944	15.5493	17.1065	29.2446	9.68543
16.2333	4.36512	6.79887	3.43533	102.169	94.2309	94.1543	70.3533	41.1029	65.562	39.912	55.4163	13.0323	21.1103	13.4331	35.2363	7.83272
16.2667	14.5593	7.01964	4.09734	100.92	94.1596	94.4333	70.2024	38.3948	67.6134	39.863	53.9716	11.3718	14.8797	7.77669	32.3347	10.0623
16.3	5.10433	8.62636	3.49748	98.0978	91.7098	93.5772	69.5829	39.7882	65.7374	40.094	53.8884	11.9491	13.0496	16.8843	34.3685	8.07317
16.3333	4.93991	6.25961	4.23285	95.298	91.6349	90.7629	68.1325	39.2178	65.5815	38.774	53.8843	14.5372	19.6463	11.9277	35.234	9.06475
16.3667	4.9614	9.70061	3.84444	96.6045	94.6095	90.2921	69.2414	39.1196	65.0523	40.101	55.1208	11.8933	15.8454	12.516	27.8733	8.45046
16.4	2.93427	6.83453	5.0089	92.6073	93.2124	93.5206	68.708	42.134	66.3158	38.971	55.7159	12.3887	17.6145	9.5365	32.6128	7.88643
16.4333	5.44756	5.2253	6.22357	92.3953	93.5763	90.4052	70.2559	38.6204	65.3979	37.066	55.7247	13.6442	16.5916	15.506	34.7254	5.96715
16.4667	6.07684	8.15668	5.76611	100.635	92.6383	94.2218	69.9696	38.995	67.3588	38.163	53.6311	16.3694	14.9536	16.3697	34.1494	8.2479
16.5	5.12735	7.53981	4.72838	101.288	91.4782	89.3765	68.8492	36.6554	65.5218	39.413	54.6697	13.6103	12.5101	12.9187	35.628	8.29057
16.5333	4.87602	7.30045	4.34987	98.338	92.3988	91.22	68.352	39.9173	65.9179	38.691	53.6106	11.436	22.1554	16.5556	33.2955	7.82108
16.5667	5.17474	7.69202	4.5143	98.7443	93.5446	90.7483	70.4351	39.0116	65.7448	38.854	54.5093	8.95406	15.4704	11.2438	35.4137	6.83685
16.6	5.44602	7.16004	4.52662	99.5563	93.8231	90.2205	69.7446	39.4711	66.4269	39.823	53.8174	13.8911	17.1711	11.6626	35.1895	7.65604
16.6333	4.72081	7.53479	4.28697	99.9667	93.5816	90.8215	69.1939	40.0828	64.9021	40.018	55.1194	21.4331	11.3505	15.4684	35.9782	7.41878
16.6667	6.72454	6.65444	5.2786	98.0327	91.5697	91.2677	70.7141	39.7058	64.0556	40.023	52.2397	15.4907	10.1548	22.3864	36.9823	7.51945
16.7	4.53894	8.65399	4.69553	99.5094	92.8625	91.5153	68.2699	39.7798	65.702	39.885	53.2906	17.7541	11.8378	19.3808	39.2466	7.39046
16.7333	6.09813	9.21837	4.02026	99.8226	91.5866	92.78	71.0904	38.2897	63.8344	39.404	56.0857	14.5266	15.557	18.5117	43.539	7.64537
16.7667	4.5374	7.19621	5.22783	98.4623	93.0144	91.1307	69.1578	39.3224	65.0693	38.384	54.117	14.6071	20.4775	15.9142	39.247	9.73325
16.8	3.92712	8.34154	3.44055	100.022	92.9415	90.2139	67.5532	38.7895	66.0582	38.994	53.9129	15.9407	20.7975	17.5891	46.2144	8.5342
16.8333	4.63812	10.0748	5.56827	96.2794	93.0185	94.3884	69.9909	38.3594	66.5651	39.391	54.5749	11.4878	11.4883	11.0686	35.8264	7.23743
16.8667	4.00788	7.94871	5.80698	95.859	95.231	90.7542	67.6379	39.7676	67.048	38.551	53.3882	15.4337	16.4027	6.72714	38.0383	7.9318
16.9	6.57969	8.46235	3.6858	99.5303	91.8373	91.7186	70.12	39.6256	66.7598	37.356	52.5481	12.8095	20.2658	2.38003	39.5269	8.76226
16.9333	5.18606	6.97242	4.20485	100.096	92.2197	90.5847	69.2052	40.2792	66.8491	38.074	54.2582	12.0967	20.2519	18.4108	35.2883	9.33831
16.9667	3.56317	7.67971	4.10369	98.6504	92.635	92.0906	70.9651	40.197	65.8784	40.141	54.149	13.4703	19.3468	15.7657	37.7768	9.12447
17	4.82633	6.25709	4.39728	101.855	91.3546	93.632	70.0852	39.4192	66.0614	39.196	53.5772	14.1226	17.3839	6.3719	38.245	8.27095
17.0333	5.37158	8.33852	4.04135	97.5636	90.5717	90.9888	69.1544	43.1714	66.5365	39.669	54.1054	15.4299	25.0068	16.3697	32.7796	10.9395
17.0667	4.7517	7.6767	5.21365	100.609	92.4952	89.7863	70.3803	40.8339	65.5698	34.077	54.4575	14.7457	25.5835	3.47245	32.5212	9.49476
17.1	5.19757	7.12337	4.77355	97.5604	93.3563	91.2283	69.9819	40.2548	65.9807	28.783	53.9641	13.1625	27.7354	13.6557	35.7756	10.7463
17.1333	4.60129	6.90385	4.89095	102.181	90.9732	90.1817	69.9681	39.5579	66.1271	32.121	55.7002	14.5593	25.2696	6.1334	32.9289	10.665
17.1667	5.5479	7.25272	3.66564	99.8428	92.099	91.9314	69.6427	42.7856	64.3509	38.598	56.3239	14.6646	25.2585	8.68324	36.6926	10.3548
17.2	4.75669	8.29783	5.15523	98.6442	90.5458	90.5991	69.7374	40.5861	66.8743	38.044	54.6363	12.9852	23.3433	11.4027	32.6463	11.0087
17.2333	5.76354	7.76837	4.19123	99.1183	88.1993	92.4575	70.6994	41.1114	65.9333	39.032	54.2043	13.5929	26.692	5.00402	31.5954	10.7865
17.2667	4.89252	6.73155	4.29873	99.5038	91.2884	90.712	69.8193	39.3887	65.4785	39.527	55.2286	13.3044	20.1847	5.26403	35.9349	9.73533
17.3	4.52129	8.59472	5.17203	102.586	91.5744	95.8408	70.5582	40.645	66.3445	40.146	53.5403	13.2755	20.3258	9.982	27.9588	12.1463
17.3333	5.29542	8.24961	5.06135	104.607	92.695	90.8139	70.2974	40.3001	65.3628	38.109	55.8407	12.6616	26.6114	11.2597	32.7767	11.8433
17.3667	6.18773	9.78324	4.83253	98.2899	89.407	92.8814	70.5196	39.6964	65.3717	38.841	54.2814	13.7163	16.3849	5.31159	32.2898	10.9524
17.4	5.35662	7.04878	3.59938	98.3645	89.6543	88.9267	70.5841	39.1787	65.5807	39.012	54.6622	14.7998	17.3728	17.0644	39.5007	8.87715
17.4333	4.69395	6.74361	3.84538	100.325	93.1333	86.0599	70.4041	41.4207	65.4331	38.774	53.5553	14.0123	21.1831	10.6289	40.1171	9.16787
17.4667	5.33513	6.36334	2.71993	98.0985	93.197	92.0283	69.7901	41.5905	64.8579	38.662	56.2017	13.5884	23.8539	7.71854	32.6239	9.53657
17.5	5.77678	6.63435	4.49751	99.343	91.6753	93.1208	68.0121	40.1222	64.9019	37.235	53.6427	13.4478	21.3098	5.51324	37.0591	10.8099
17.5333	3.88663	5.82207	4.57421	98.7496	92.6818	91.5375	70.9306	42.1244	64.9776	40.632	54.117	12.0195	20.0991	17.7642	32.3548	8.07636
17.5667	5.37561	6.20435	5.60522	99.6472	92.1832	95.9435	71.9942	40.9436	64.6685	39.895	52.0636	12.1478	19.6513	15.8078	34.1427	8.74216
17.6	5.12448	5.88964	4.59717	97.8832	91.7511	91.2429	71.6879	37.8259	66.312	40.047	54.6363	16.6469	22.5316	13.7882	28.7549	8.62212
17.6333	5.59893	6.67881	6.15638	99.8062	91.7082	92.9991	73.1783	39.9875	64.0674	38.657	53.7587	16.4181	24.5879	14.9438	36.648	7.78613
17.6667	4.52129	7.79023	6.64799	99.4941	92.9676	93.2272	70.8698	35.5699	66.1771	40.143	56.2631	14.7861	24.3845	11.832	37.7514	9.69082
17.7	4.65367	4.62224	4.76422	98.8622	92.2803	92.0466	70.3384	39.8604	64.1909	38.965	53.9975	14.2633	26.3408	17.054	36.9232	10.0085
17.7333	6.15051	5.38529	3.92937	99.9477	93.6763	96.6291	71.9009	40.7538	64.7211	37.971	55.0901	15.0592	18.7018	16.7197	30.2115	7.83689
17.7667	4.99651	8.63666	4.10406	98.343	92.1222	92.2445	71.5781	40.8499	65.2671	38.942	52.1148	13.2353	21.3554	11.1485	33.2447	10.1591
17.8	4.88773	7.75858	4.09436	100.491	90.49	90.6692	71.9606	39.3919	64.7515	37.436	53.4025	10.0295	27.1642	14.4718	37.1673	9.21079
17.8333	5.58742	6.38343	4.28455	100.796	93.2118	94.0962	70.0154	39.1074	66.177	38.699	56.4679	13.9823	21.2103	14.9066	38.7105	8.68465
17.8667	4.93224	7.29467	4.82319	98.9585	94.0312	89.5094	69.616	37.6703	64.5062	38.321	53.8638	13.7422	23.5178	12.0494	37.6906	9.51487
17.9	5.96518	8.99508	5.3135	99.1451	92.6174	91.197	71.2517	39.5349	68.0013	39.539	54.6568	20.3762	16.6232	19.8899	32.9792	7.95436
17.9333	6.02235	7.57347	4.77467	101.027	94.8468	92.7848	71.0563	37.8719	66.0048	39.726	54.203	27.9419	24.3218	16.9637	41.2935	11.7669
17.9667	5.82685	8.29909	6.70492	100.966	92.1435	92.0261	68.8064	40.604	66.0052	39.366	54.4445	35.1024	24.1617	15.7971	37.8125	9.63099
18	4.60359	7.35997	5.79728	96.2463	93.6791	93.1323	71.2558	38.8087	66.1687	39.047	56.8302	17.0579	20.7081	14.8591	39.3136	8.69826
18.0333	4.39543	8.13181	4.72203	97.4955	92.929	93.6487	69.6339	36.7978	62.2918	37.79	53.6966	18.2984	22.0049	13.9951	38.8626	8.7592
18.0667	5.69869	7.15552	5.47439	96.5946	93.3795	90.2374	69.0006	37.6366	66.6212	38.737	54.379	19.7395	17.5711	16.0358	37.1136	8.872
18.1	5.5713	7.55739	5.16699	96.5727	94.3672	94.7823	69.0929	38.9271	65.2423	36.68	54.0835	18.8817	23.2811	9.58461	43.7365	9.41801
18.1333	4.33327	9.27111	3.85919	96.016	94.1062	94.4006	69.8387	39.3723	65.7276	40.708	56.2979	16.0674	24.5379	12.6326	35.816	9.42046
18.1667	5.63538	7.6227	5.31891	99.2024	91.0551	93.1234	69.6526	39.7385	66.4441	40.183	53.7444	15.8732	22.4771	11.6839	38.9429	9.60781
18.2	4.82806	8.44125	4.57869	100.236	89.9117	93.6651	69.3156	38.0874	64.652	38.878	55.649	18.36	17.1116	12.2719	39.431	8.53763
18.2333	3.39894	7.06711	3.51857	100.882	92.5899	94.397	69.2157	39.9397	66.757	38.447	53.5246	19.782	18.2979	16.6455	40.3334	8.2116
18.2667	5.89458	6.9777	3.70148	100.021	92.5514	93.1895	68.3702	39.3898	66.5272	38.306	53.6802	17.6338	24.9829	9.0969	38.9196	9.78793
18.3	5.08035	7.635	3.60816	98.7986	92.2773	92.6271	68.9579	38.8199	66.0554	41.237	55.5835	16.8644	20.5158	22.217	36.8702	8.41698
18.3333	4.61088	7.91706	3.23002	99.5187	91.8524	95.0139	67.7945	38.8752	68.0864	38.249	52.7692	18.0097	13.873	13.4808	42.5113	9.06328
18.3667	5.27374	6.24253	4.80696	100.847	92.4872	94.8412	69.393	39.5194	65.7635	39.551	56.9264	14.3815	18.9368	13.7723	47.0645	7.89857
18.4	4.90941	6.27091	2.68708	102.919	93.527	94.0226	68.581	39.6074	65.5557	37.471	56.3287	26.323	24.0334	14.6895	42.3908	9.45773
18.4333	4.37951	6.8825	3.93459	100.629	92.7984	93.813	68.6119	36.4182	65.5985	37.574	57.2362	12.6642	18.0773	7.30472	38.5153	8.89861
18.4667	5.22098	5.66007	3.91612	97.0513	92.6392	91.6888	69.2653	39.6621	67.1856	38.518	54.7864	11.4637	17.6417	10.2256	39.8912	7.71587
18.5	5.18491	7.93264	4.11694	101.731	91.5576	91.3591	69.0107	39.5627	66.254	37.836	54.4923	13.786	16.2121	9.19202	36.629	9.10276
18.5333	5.12236	5.26222	4.46372	103.55	90.7913	94.5587	67.4146	40.3502	67.196	38.418	55.5705	20.0915	28.3294	9.70134	33.7364	9.54295
18.5667	5.38156	5.71181	3.79069	101.259	90.6336	93.3402	68.2705	38.8413	67.2187	37.914	54.4165	11.1254	23.1822	17.1917	41.6156	8.59489
18.6	3.77824	7.30422	3.8842	102.124	91.7146	89.8131	68.4653	38.121	68.1	40.4	53.7266	14.8571	27.0937	20.5893	34.823	10.0903
18.6333	3.6332	5.59477	3.57419	99.5759	90.1022	92.414	69.0197	40.1827	66.8244	41.146	57.1885	15.511	20.9464	16.9212	40.3225	7.54274
18.6667	5.81534	7.57497	5.48073	99.8938	91.8029	90.514	68.3902	38.171	66.8123	38.523	51.7784	15.2622	24.5684	6.82231	31.763	11.0426
18.7	6.77058	5.15045	4.80658	98.1127	91.9812	91.2356	68.6116	40.1433	68.1136	38.81	54.0426	27.8873	20.2997	13.0994	39.4084	12.1139
18.7333	5.69083	6.84131	5.13918	102.228	89.3008	95.3556	70.875	39.3055	68.1952	37.881	54.4193	12.4797	29.8028	15.9726	35.461	10.7503
18.7667	7.35171	6.25031	4.58784	100.142	90.9529	92.7089	68.5642	40.1994	67.7619	37.615	54.0453	22.5236	29.3828	17.6316	36.8695	10.5143
18.8	5.93276	8.64972	2.72236	102.48	91.551	95.046	67.9894	38.5919	67.0442	39.685	55.5268	15.6965	20.388	15.6328	37.4237	8.85864
18.8333	3.76768	6.93173	4.27372	100.33	89.385	92.0376	67.7372	40.0581	66.8792	37.201	53.743	16.1121	24.9835	13.03	35.5406	9.5508
18.8667	6.00163	7.46672	5.17931	98.9658	91.0342	93.4372	65.8583	40.0649	67.0856	37.537	54.7905	18.1887	31.1874	7.71297	45.8685	9.80191
18.9	4.59803	7.76059	5.7103	102.409	91.5553	92.9951	68.3542	39.3486	66.2284	41.838	55.5603	17.8594	28.7266	16.916	35.9596	10.6499
18.9333	5.94734	8.29206	5.90124	101.674	91.902	91.4122	70.543	38.2469	67.1164	40.001	53.3165	18.513	32.1192	17.4194	36.3235	12.5284
18.9667	4.08328	6.71397	5.90329	101.972	91.8129	95.56	69.5	38.4505	66.7146	39.034	55.7131	17.8864	23.4333	14.8275	35.8913	8.0419
19	4.62853	7.77214	3.93609	99.4426	93.228	94.6349	68.3601	40.2349	65.8425	40.101	52.6368	32.665	28.8261	12.6752	40.4477	12.6024
19.0333	5.4865	7.0214	5.01618	99.0666	91.411	94.7254	68.1263	40.3751	67.2353	39.174	52.2472	20.6094	25.5724	10.9363	37.7241	10.5419
19.0667	5.74838	6.48717	5.51731	98.1941	92.2846	93.8502	70.2049	38.7343	66.1576	40.206	51.1328	17.191	36.6046	9.74339	39.928	14.4768
19.1	4.66997	8.23605	5.64442	101.467	91.4364	93.7107	65.844	40.1165	66.0512	39.33	53.6045	27.8782	35.1183	3.11197	38.6662	12.1227
19.1333	5.84968	8.16949	4.7491	103.761	90.8282	97.0039	68.2095	40.1203	66.6599	38.475	54.2432	17.7569	27.9788	22.3707	35.4466	8.44972
19.1667	4.91209	4.2804	5.41074	102.99	90.4918	94.7777	69.0786	39.0043	65.5451	39.15	54.149	19.3404	32.3436	9.87585	36.0954	11.5971
19.2	4.49385	6.52333	7.02613	103.885	89.651	94.4386	69.9673	38.6934	67.4001	39.607	56.0229	20.3366	27.8221	4.67548	38.557	10.0652
19.2333	5.87424	9.05586	4.59101	103.405	91.8581	95.1315	67.8596	40.0477	66.8026	39.109	54.203	17.1861	30.4129	15.9458	34.8708	10.942
19.2667	5.45197	7.28287	4.1832	102.591	89.333	93.1414	69.101	39.4595	65.7535	40.152	53.12	15.8524	29.7289	24.8255	38.9359	11.7664
19.3	4.80197	10.815	5.44602	99.7024	92.501	93.3441	69.0117	40.0624	66.8912	38.388	55.058	19.8511	26.8853	19.3385	39.3485	9.69941
19.3333	5.48171	8.41814	6.88558	103.016	91.6392	94.9071	68.2717	39.0985	66.1	38.34	55.767	17.8115	34.7538	17.4565	44.0572	10.9956
19.3667	5.30846	6.60521	4.69646	100.534	90.3918	91.1293	67.4687	39.4277	66.4371	38.711	54.5885	17.3707	28.4944	16.1947	41.6059	11.2891
19.4	4.34018	7.69604	3.90081	101.585	91.2881	88.8997	69.4799	39.2496	66.5762	37.983	53.3963	17.2751	33.3443	18.5432	41.3155	11.1954
19.4333	4.1276	7.96504	4.73491	101.656	90.5738	92.234	67.9609	39.6418	65.2829	40.678	52.2383	22.6675	29.8523	15.0076	37.514	11.2354
19.4667	3.66485	7.02391	6.61346	101.359	97.4541	93.8973	69.224	39.7651	66.3018	42.375	54.2685	20.453	29.5384	27.9689	32.9781	10.6054
19.5	5.37293	6.82147	5.2814	103.254	88.6566	92.0944	70.2674	41.454	64.9602	40.534	52.2833	21.0982	31.058	16.28	31.3559	10.8729
19.5333	6.30764	7.96202	6.36691	100.23	97.5396	92.3762	68.5772	41.1493	65.4582	39.576	54.5987	22.1182	25.8847	26.5585	30.5786	10.7724
19.5667	4.21087	8.72256	4.88665	100.046	92.1392	95.1507	69.089	40.7417	65.4077	38.04	55.6299	18.259	33.6665	15.9882	31.9019	11.1493
19.6	4.61491	8.13257	4.83701	102.037	90.8514	93.2859	69.6525	38.6977	64.1072	40.099	52.5174	18.6258	37.943	23.3198	40.0632	10.9616
19.6333	3.4895	7.45667	7.17451	99.3692	91.7016	91.2804	68.652	41.3694	64.8029	37.557	54.3381	20.3658	30.209	25.0847	36.9846	9.35547
19.6667	5.6231	6.79334	4.88031	101.67	92.0923	94.5753	68.6024	40.3561	64.7264	40.389	53.6584	20.0612	25.0085	14.949	35.0513	8.6437
19.7	5.36928	8.54624	6.05354	97.9862	91.1666	86.6493	66.4664	37.6191	64.854	37.128	55.1181	20.1594	25.8619	14.4615	36.2868	9.27173
19.7333	5.46233	5.99513	4.51524	102.592	93.5521	91.4483	69.9807	39.6669	65.0899	39.435	53.829	26.4149	28.3788	13.8572	34.3407	10.5539
19.7667	4.85722	9.33164	5.47065	100.877	91.0077	90.2817	69.4497	38.9985	65.9467	38.844	52.9105	20.0404	31.6136	15.7975	35.7709	10.5365
19.8	5.19373	8.47893	3.74011	96.8702	91.5185	91.4179	70.2231	40.673	65.5559	40.667	51.5907	20.4349	34.4399	13.6185	36.4283	11.6151
19.8333	4.77818	8.12202	5.25844	104.923	91.3697	94.3553	70.3899	40.4934	64.7452	40.624	52.7767	21.3094	31.788	23.7757	36.9601	9.03704
19.8667	5.52909	6.81594	5.53654	101.698	91.6381	92.1821	70.3914	39.0631	65.3399	39.942	53.9525	20.0763	31.2213	18.2254	31.1216	12.7099
19.9	6.93941	7.6247	5.84468	100.865	91.6127	95.4784	67.2947	40.572	65.5173	38.989	54.4759	22.5227	34.2266	25.1009	34.3964	11.0614
19.9333	5.19565	5.38579	5.77507	102.813	93.029	90.5304	69.7444	37.7336	64.7131	39.217	51.953	20.3006	31.9869	18.8348	36.7868	12.8795
19.9667	4.88638	6.91917	5.07759	101.028	92.2573	88.9917	69.0884	39.1194	65.9206	39.38	54.6349	21.8122	26.3519	21.3474	35.9223	9.17866
20	5.32611	5.62918	6.85311	102.387	93.2117	92.6673	70.832	39.7719	65.8172	39.854	52.2342	23.7674	28.5027	17.3029	41.7057	10.9961
20.0333	5.75702	5.79846	6.66106	103.429	91.4952	93.7026	69.4875	38.7467	65.1282	40.71	54.1634	20.7545	29.9806	18.6493	38.0147	12.2677
20.0667	4.46469	4.99347	5.96955	99.6322	91.1658	89.212	68.787	41.0202	65.4313	42.217	52.5044	26.975	31.0468	26.4261	37.7086	12.02
20.1	4.99708	6.75566	5.3359	95.9772	91.8187	88.7104	68.1128	37.9517	65.5539	39.438	54.2159	23.5957	28.7166	26.9034	36.5567	11.951
20.1333	5.17973	6.58839	5.05314	96.862	91.6468	92.7344	68.3033	37.8263	66.7449	38.443	54.0965	25.1747	30.3984	16.9634	32.4464	12.1056
20.1667	3.67617	7.71186	6.18717	99.4646	93.187	87.9638	70.9	37.6155	66.4814	40.477	53.2844	24.1129	34.7116	17.4885	38.7927	10.9061
20.2	6.47263	7.90601	3.59285	101.606	91.2499	90.5088	69.606	39.1229	65.1592	39.729	53.135	23.4122	37.6919	17.4196	31.8558	13.1023
20.2333	5.10721	7.1623	5.69145	93.1536	90.7612	91.4899	69.0973	38.719	66.0693	37.568	52.4232	23.2432	35.0678	12.7649	39.4798	12.5698
20.2667	5.35854	7.7096	4.56992	100.813	89.8928	90.6345	68.3124	39.8244	65.4251	37.576	52.8511	19.8983	29.0794	7.61786	42.6149	12.1965
20.3	5.86541	6.45477	7.33054	98.0504	91.9271	91.1526	70.0799	39.5209	65.6542	37.763	54.3988	18.6414	32.0236	16.6562	35.7018	11.5761
20.3333	5.98225	6.73406	4.60333	98.6025	93.3796	87.9926	64.6329	39.836	66.0752	41.786	53.5581	18.915	23.9589	18.3949	39.3861	9.13244
20.3667	5.96307	6.73155	4.90756	100.307	92.1539	86.1346	68.1206	39.8831	65.4137	40.29	53.4632	21.6278	36.3835	21.3478	40.1663	10.6634
20.4	6.79303	6.64892	6.76091	99.1749	93.509	88.0998	69.4397	40.2666	65.6539	41.398	53.3882	21.5889	31.9436	19.466	36.6669	14.1433
20.4333	6.21631	5.42673	7.48079	99.4253	93.135	87.4429	68.2896	39.7598	65.5356	38.423	55.0976	15.2474	31.5141	9.37259	43.6161	12.3883
20.4667	4.90308	6.32943	6.63362	99.9197	90.5503	89.4528	70.958	39.9712	66.5632	39.988	51.8589	19.9354	40.42	5.52377	31.0214	13.577
20.5	3.73104	7.03722	5.87716	99.2866	90.5212	91.6738	71.1749	39.6659	65.0847	41.744	54.3572	23.6967	32.9059	14.7794	35.5033	12.3124
20.5333	5.53696	6.58361	7.44196	99.0637	90.5705	88.8703	68.706	39.3549	66.4571	40.109	53.0981	17.8642	32.2208	10.8724	33.4972	10.9278
20.5667	7.00407	6.3003	5.99568	103.549	92.3217	90.985	69.818	39.8981	65.9064	40.66	52.183	18.9206	36.4023	16.0728	33.053	11.7224
20.6	5.635	6.40102	5.23231	101.278	90.7391	93.6004	71.3585	40.5713	68.4045	40.669	54.3688	18.4072	35.9162	20.7431	31.423	12.5133
20.6333	4.45625	7.33209	5.36203	97.6222	92.1368	92.2655	69.0695	39.8086	65.9685	38.644	53.5956	25.5342	39.1504	17.1596	26.9344	11.2609
20.6667	4.85396	6.68358	6.50726	100.9	91.3646	90.2526	71.3173	39.6093	66.2926	40.932	54.6185	23.2181	33.9227	20.2929	36.5805	11.255
20.7	5.11085	6.55573	7.06588	98.8112	91.869	88.6744	66.0203	39.1053	66.5169	38.4	54.9986	19.4436	31.5685	20.7274	36.0705	12.886
20.7333	4.54239	6.3008	5.24165	96.1931	92.1143	94.2726	70.4698	39.3891	65.4448	40.64	53.4912	19.9891	37.1457	12.7438	29.7442	13.7798
20.7667	7.68822	4.75385	5.97347	101.017	92.7241	91.7178	70.0676	39.3822	65.6307	41.59	51.6125	25.3347	31.8508	23.044	30.4897	10.8459
20.8	5.49936	5.92907	6.45127	100.457	93.816	93.7325	70.8174	39.9109	66.3434	40.999	53.4837	19.1612	31.4358	22.5722	30.0404	11.4869
20.8333	4.89962	8.14738	6.84434	96.4145	94.5088	89.8638	70.2461	40.2382	65.873	42.428	52.9439	22.6499	37.3108	23.85	35.3812	12.2847
20.8667	5.40151	5.97302	5.85327	99.4673	92.1927	90.5491	69.1312	38.9355	66.0198	38.784	52.9951	21.9187	34.4283	22.4449	32.8928	12.3653
20.9	5.65936	5.8384	4.37171	98.2581	93.143	84.1155	69.5192	39.4818	67.1441	38.605	51.822	18.8564	30.539	9.73793	36.375	10.6787
20.9333	5.12045	7.21204	7.73126	101.186	91.7429	88.8231	68.9171	35.6982	65.3458	37.978	50.447	20.6258	27.5643	15.8928	36.7821	8.66
20.9667	5.30942	5.82509	7.23964	100.645	90.9484	89.8286	69.3826	41.7954	67.6662	38.494	51.9913	17.9605	29.4156	24.12	28.4857	9.61333
21	5.45888	7.1932	6.75531	98.6384	90.6716	92.4039	69.8935	40.9014	66.337	40.395	53.4694	21.5834	31.3813	15.4049	36.4096	9.26903
21.0333	4.85722	6.26915	4.57608	99.4538	93.66	87.6685	69.886	42.6143	64.2737	39.271	55.2559	18.604	26.1858	18.252	32.3663	8.92154
21.0667	5.15555	8.46561	5.30361	100.555	94.7899	93.6481	70.1717	40.359	65.2201	40.285	54.3715	19.3738	30.019	11.1854	33.2945	12.7092
21.1	4.87276	6.129	6.26911	100.31	93.0389	91.5353	69.1843	40.556	66.0306	40.459	54.2159	22.9709	29.7289	14.0216	33.5488	9.38245
21.1333	5.06481	5.35063	6.40368	101.116	92.7947	90.8736	66.7812	41.7098	63.9073	40.963	53.6311	21.8392	29.0227	27.8363	24.6938	10.2118
21.1667	3.28575	7.41347	4.29388	98.9604	92.1066	88.502	69.8304	38.3586	65.0889	39.746	53.3329	21.7445	27.9565	20.5417	41.9849	10.5858
21.2	6.11924	7.51218	7.51569	97.7385	92.6193	87.996	72.5328	40.214	65.0369	39.181	53.062	19.7068	21.4959	10.8303	35.0833	8.96776
21.2333	5.91472	5.4624	6.99608	98.0071	92.1223	91.408	69.9884	39.4336	66.2813	41.304	52.5495	25.431	23.7906	22.9539	32.1447	10.6768
21.2667	5.84258	5.73366	7.80517	100.02	93.0863	90.2532	68.9276	39.0982	65.3123	39.801	54.3162	29.1246	22.9494	10.7081	33.4635	9.80277
21.3	6.6689	8.28829	4.27204	103.374	94.0209	93.1375	69.6389	39.2215	63.9804	39.915	52.3884	22.039	18.0595	20.2663	32.2016	9.67341
21.3333	4.8507	7.1289	8.51665	100.215	92.8076	90.097	67.092	40.0312	66.0079	40.703	53.829	25.7138	28.4516	17.9708	25.5709	11.1498
21.3667	6.91927	5.753	7.3115	100.541	93.1607	86.0685	69.0976	38.7177	66.0541	40.753	54.9215	24.7134	36.0295	16.1949	29.0128	10.3538
21.4	5.84162	4.73301	6.16571	100.297	93.2812	87.3043	69.778	39.5681	65.0703	41.209	52.7344	24.0808	28.3199	15.0501	38.6935	10.6503
21.4333	6.33757	6.70242	6.34339	99.8124	92.7973	86.3006	68.6706	38.4656	65.4891	39.993	55.4033	25.9352	25.598	25.4296	35.533	8.68673
21.4667	5.33225	6.78505	6.77397	101.484	92.1824	88.915	69.011	39.8025	65.2456	41.197	53.9027	22.3152	28.1643	19.4708	31.4853	10.8985
21.5	5.34146	5.66334	7.45354	101.27	93.9885	91.7429	68.4397	40.002	64.5292	38.384	51.994	29.4387	23.3406	12.4046	29.78	7.56187
21.5333	4.63256	7.10052	6.34582	101.931	93.0154	88.9513	68.5724	39.865	67.3234	41.591	52.3502	28.0657	26.7814	17.9389	31.4353	10.6898
21.5667	5.77908	5.39006	7.04031	103.611	94.5164	89.5454	68.9556	41.3682	65.5401	40.844	54.207	21.6509	27.1943	19.2747	36.289	10.1756
21.6	6.96877	6.48817	6.56979	99.0752	95.8413	86.8824	69.3912	40.5526	66.0173	40.152	53.264	22.1528	26.6559	18.1035	28.7453	10.478
21.6333	6.17622	5.62139	6.80943	98.498	93.7484	91.496	69.733	38.6185	65.5406	40.004	52.3884	22.1557	27.0887	14.7634	34.4463	8.5602
21.6667	3.89834	6.18752	6.28311	98.4806	96.1307	91.4083	68.0016	39.1552	65.1572	40.583	53.4414	25.1964	31.953	12.3465	33.5577	10.0359
21.7	6.26313	5.56613	5.83255	100.109	95.2095	91.3045	65.6549	39.1724	65.5171	33.394	54.1327	20.3125	26.9976	19.5984	40.3371	10.1733
21.7333	3.4636	6.98322	7.28686	103.252	88.3825	88.1815	68.8507	39.8198	65.5549	29.239	55.5862	27.9629	27.0715	14.7479	41.482	10.9862
21.7667	5.07479	4.55719	4.62087	100.139	88.8087	90.0851	66.0654	41.7741	65.6101	36.461	54.5749	21.3283	30.4623	16.9055	37.7457	10.7885
21.8	4.03302	6.60948	5.36166	101.925	92.0595	90.2085	67.8409	41.3421	66.8461	39.839	54.4322	30.9917	28.4238	20.3033	37.3624	11.0906
21.8333	11.7651	6.24002	7.8537	100.686	93.3826	92.2591	69.1652	41.002	65.1091	39.696	53.3486	21.7031	27.8143	18.909	47.9897	12.4862
21.8667	5.92182	6.48164	5.59328	99.6493	95.3753	89.3315	66.2812	41.9955	65.141	39.356	54.3176	19.1656	22.7016	18.2147	51.7075	8.41281
21.9	4.28703	6.13628	7.584	101.044	93.3268	86.9283	68.9283	40.074	66.8538	39.545	51.3525	22.9802	31.6375	20.3455	42.4802	11.5454
21.9333	3.31069	5.56965	4.51318	100.157	92.3445	88.3427	68.3454	39.2895	65.559	41.671	55.5282	22.8247	26.1364	12.7175	39.9916	10.1303
21.9667	4.63199	4.47456	5.74408	105.333	92.0413	89.6642	68.309	39.9612	65.7296	40.522	53.9245	23.8661	28.6849	21.7981	45.5291	10.5199
22	5.4207	7.5373	6.52369	99.2974	92.8075	91.3773	68.8723	39.7948	67.6131	38.914	52.3837	22.009	29.9784	19.3014	54.8952	10.0402
22.0333	5.52008	5.6661	4.7407	103.359	91.551	88.875	69.0918	41.4275	65.394	38.966	52.95	23.1225	20.4675	14.8006	50.0106	9.70701
22.0667	5.70387	5.48551	4.25748	101.859	92.3603	91.8765	69.9701	38.8292	65.213	42.101	54.9488	18.475	25.2713	16.1419	49.6468	10.1748
22.1	5.77179	6.9792	6.60712	103.585	92.3346	88.4047	69.799	39.9983	65.6659	39.104	52.1857	23.263	27.6876	15.3629	44.7865	9.57544
22.1333	4.33692	8.20993	6.7303	101.717	91.4457	90.3774	68.0302	40.2682	66.6017	39.87	49.7386	21.8035	28.8677	19.2697	59.9815	10.7937
22.1667	6.39762	7.8485	6.23271	99.1118	92.0061	90.8128	69.5006	38.4058	66.5141	40.684	52.1557	22.5138	30.664	19.7678	38.616	11.3166
22.2	5.47921	9.01442	5.1011	101.786	91.3164	92.5825	69.7524	38.4938	66.0388	39.046	51.7859	23.6354	28.7761	21.5648	41.8473	9.31415
22.2333	4.94298	8.26694	5.21943	100.571	93.373	88.7821	69.957	41.8567	66.7302	39.503	53.6133	20.2926	26.2242	21.6552	47.2141	8.54168
22.2667	6.32893	7.18667	7.72902	102.471	94.1219	90.4693	68.9792	41.3537	66.5563	40.296	54.2562	23.3463	24.1584	21.4431	46.807	9.19742
22.3	4.72062	6.58788	4.78344	101.504	94.8583	85.4415	69.8709	40.9095	64.9925	38.84	53.6427	19.2544	28.7494	19.8738	43.4621	11.4139
22.3333	5.27412	5.70327	6.47759	104.236	93.0814	86.5216	69.8372	40.5967	63.7792	40.545	55.0498	19.4062	23.0844	21.077	54.1491	9.97308
22.3667	5.88076	6.65947	6.69166	99.4477	91.8298	88.9429	68.0433	40.0584	66.6271	40.627	53.1261	25.709	28.6499	20.6321	63.9752	9.88664
22.4	4.0618	5.45085	5.7495	102.836	93.1005	86.7719	68.0466	38.7959	66.3027	41.451	52.4812	21.6884	26.7498	18.2727	58.5861	8.97169
22.4333	4.53874	6.13955	5.90124	100.326	91.4896	86.3141	70.6738	40.5714	66.1809	39.959	51.5368	18.4774	28.9716	24.7349	54.0896	9.913
22.4667	6.15569	7.10152	8.25833	105.552	93.5515	88.1909	69.1109	41.1809	65.1251	39.356	51.0291	21.1528	26.3075	9.56315	46.9971	8.39062
22.5	4.52627	7.10654	6.62429	104.15	91.8926	86.5271	69.5401	39.2384	64.9455	38.164	51.646	21.5275	30.9507	16.8416	52.2695	10.0538
22.5333	5.81572	7.65911	6.38613	103.517	91.8777	85.81	68.7564	39.5393	66.4122	40.028	51.3321	17.6427	28.8294	22.8901	55.1776	11.3243
22.5667	4.80677	7.81333	6.52555	101.525	91.9265	82.3464	70.0038	39.6658	65.2533	41.019	53.9477	23.5961	26.0286	29.1087	57.2423	9.43517
22.6	5.34722	7.69252	6.96677	101.905	91.179	86.1648	69.5721	39.3651	64.8741	38.398	51.9005	20.4516	28.7794	20.2612	56.5414	11.1933
22.6333	5.09973	7.44135	7.24599	102.799	92.6856	84.4673	69.9808	40.5575	65.9155	40.412	49.7721	14.1493	23.0294	16.8152	51.9831	8.35445
22.6667	6.42524	7.9575	7.00485	106.636	89.7959	90.3849	68.2546	41.1147	65.9569	40.421	52.2049	20.2092	27.8171	17.0168	56.5215	9.23261
22.7	4.76014	6.76847	8.09745	100.542	92.2777	88.635	69.1327	37.9465	66.0793	40.769	54.7803	26.2272	28.6016	18.0819	54.3989	11.2684
22.7333	4.78182	7.05003	5.66999	104.579	89.5501	87.8556	68.6997	40.4493	65.4384	42.152	53.3206	21.99	23.7645	11.4239	52.1965	9.81601
22.7667	4.77664	7.10454	5.82285	103.444	92.4103	91.462	69.3331	40.0847	67.0911	39.654	50.8953	19.086	25.1735	25.3555	58.5861	10.0973
22.8	6.30016	7.37881	5.42623	103.662	93.4863	88.283	70.002	38.7297	65.5263	38.932	52.7651	21.186	25.0907	23.0971	47.6585	9.43726
22.8333	5.50434	7.59959	6.68812	98.9596	92.5231	86.6873	68.5142	40.663	65.5691	40.642	53.3179	17.0516	25.473	10.0773	62.4694	9.02355
22.8667	5.14289	6.88677	5.42829	102.058	89.6002	85.4854	69.5871	43.5015	65.4937	39.207	52.486	19.8651	25.3274	10.4326	55.6881	8.45806
22.9	5.97208	6.9021	6.37923	103.9	89.215	89.1615	70.0132	39.9761	66.0652	41.772	53.8304	18.8001	21.3737	24.5548	54.6389	8.38179
22.9333	7.30528	6.21389	5.12518	103.973	88.7653	90.8288	68.7286	40.6709	65.3879	41.432	54.0583	18.5885	22.2082	8.82663	54.026	8.28223
22.9667	4.2926	4.81012	6.27452	104.496	90.5588	93.4549	69.3909	39.4943	65.1998	40.82	53.4141	20.074	20.9881	22.3126	58.2751	8.74694
23	5.33417	8.19963	7.31841	103.874	90.694	89.52	69.4946	40.2704	64.1963	42.463	53.9218	17.3479	27.4237	20.1869	59.9284	8.51348
23.0333	4.5303	6.01572	7.87908	101.665	92.3365	91.6816	68.4858	39.5546	64.1236	43.367	52.6443	19.1703	25.323	5.74649	55.8287	9.0482
23.0667	6.07722	8.14211	6.02853	100.519	91.4447	88.2559	68.8579	38.6958	64.5687	40.236	53.0121	22.4556	24.2178	13.0939	56.8811	9.91999
23.1	5.06577	7.42804	5.92475	103.132	91.5075	88.5161	68.3398	39.9887	64.7087	42.418	50.4081	19.0911	21.9649	23.0228	60.034	8.35469
23.1333	4.29682	6.97468	8.69246	100.218	91.1111	85.7341	67.7106	41.7955	65.0468	41.419	52.3243	21.2947	25.2457	21.528	52.3978	8.64419
23.1667	5.04447	6.17823	6.93635	97.3865	92.0134	85.9949	69.3204	39.8823	65.4267	42.717	52.5311	14.4375	32.4525	19.1051	54.965	9.87388
23.2	4.38469	8.24584	6.04364	103.406	91.1357	88.4075	70.3651	39.8102	62.2499	40.959	51.4092	19.699	23.0633	24.0511	52.8309	10.3131
23.2333	5.35508	8.4739	5.72542	99.3384	90.7244	89.2863	67.6278	39.3225	64.512	40.725	55.1467	20.9483	27.4454	21.141	65.6024	10.0512
23.2667	5.43528	8.36339	5.72635	101.5	91.1271	90.1495	68.0915	38.0209	64.7645	40.766	57.4314	19.4047	28.8133	17.7904	66.1531	10.1574
23.3	7.32888	7.44211	6.72265	98.9589	90.4851	87.4821	68.5028	37.9019	64.4957	37.419	53.5321	18.7402	22.9961	27.8148	59.1275	8.19051
23.3333	6.48779	5.44708	7.89924	104.365	91.4577	84.6785	68.2594	38.7734	63.9464	41.707	53.0865	21.3187	29.6745	8.328	52.1014	9.74698
23.3667	5.36947	10.313	4.6778	101.438	91.7394	85.3051	69.3781	38.7084	65.5141	42.232	54.8546	16.0023	24.709	19.6991	56.4139	9.39164
23.4	6.60002	8.63214	6.87513	103.206	92.9658	86.8525	68.7184	41.2005	65.8018	41.596	52.643	21.1602	25.3974	14.6367	56.9213	8.5808
23.4333	6.24126	7.94721	7.18925	96.4646	92.9857	88.892	68.8661	38.3761	64.8843	40.757	54.0658	17.7313	31.5336	3.50422	59.9023	9.9157
23.4667	5.9646	8.94233	6.48076	95.7577	93.2747	88.0533	69.3829	39.3548	64.9885	40.171	51.6228	19.7393	24.6662	18.8722	61.2177	8.82369
23.5	6.38649	10.4918	5.35027	99.7455	91.0209	86.8974	68.6801	39.3513	64.2579	41.338	51.9121	24.8242	29.6217	21.4537	59.8661	10.2745
23.5333	6.53844	9.65213	6.99272	99.8173	91.5732	87.6368	68.0408	37.1463	65.4609	41.953	52.0916	25.4564	22.8827	27.4172	55.2879	8.65068
23.5667	6.52827	11.5231	6.78928	101.834	93.0284	85.3493	68.4702	39.8325	65.0367	42.761	51.2126	24.7595	24.9112	16.0679	57.3341	8.41318
23.6	5.58819	7.61792	7.746	102.662	94.5282	88.712	68.2675	38.334	64.8363	41.977	52.2949	15.1457	22.2532	17.6316	63.2829	8.64554
23.6333	6.24951	8.27071	5.88649	101.923	92.2943	88.643	68.3829	39.3261	65.3662	43.462	52.5276	22.1134	25.0952	23.3196	55.0928	8.5651
23.6667	5.26069	7.90802	4.94171	100.675	92.9526	88.0531	68.3028	39.9589	63.8117	40.318	54.134	19.5904	25.6786	19.1052	55.3432	7.84204
23.7	6.25718	9.53559	6.17299	96.2168	94.6577	84.1927	64.6278	38.6979	67.1925	40.356	51.1383	20.5221	22.0277	19.8848	51.557	9.18798
23.7333	5.64881	9.89476	5.61306	100.468	92.7088	84.8956	68.3508	40.0308	64.7668	42.002	53.1445	19.0286	21.3437	13.9369	50.2409	9.42953
23.7667	6.74794	7.87688	7.61461	101.579	91.192	85.4137	68.7634	38.509	64.1605	41.099	52.8654	19.8548	27.3526	16.46	52.6773	8.48025
23.8	6.34351	10.3097	4.99472	99.3814	90.5142	83.9877	66.8145	38.6818	64.9652	40.381	53.1548	18.4764	21.9121	8.63536	49.3263	8.62727
23.8333	6.95534	10.8346	6.42383	103.42	90.8215	86.7706	66.6108	38.7118	64.685	35.402	54.3613	18.3507	29.5128	6.43011	46.4898	10.4546
23.8667	5.92259	8.70523	6.40368	103.473	92.2568	86.1349	66.5058	39.8433	64.1096	29.047	52.3884	16.292	18.8251	21.2892	45.4621	9.3605
23.9	4.94989	8.0002	5.72841	98.3902	91.3762	85.2118	65.6756	38.718	63.0924	34.778	50.9055	17.5882	23.06	16.0254	48.2386	8.04374
23.9333	5.40381	10.421	6.50241	98.055	91.3609	84.0837	67.5169	37.7759	62.6144	41.676	53.3807	21.8295	21.5504	18.6918	63.9894	9.264
23.9667	6.00182	6.9149	6.82269	99.3871	92.7936	88.1868	65.9787	40.9465	64.215	42.208	54.3729	16.6746	25.6874	15.9244	63.5775	10.4843
24	7.27573	9.31406	6.86785	93.981	92.6779	86.1142	67.5404	39.6554	65.5621	40.584	54.7325	20.3916	26.208	25.1007	55.5233	11.2089
24.0333	6.62151	8.25011	5.72542	98.1187	90.8855	89.7361	66.836	41.601	65.5357	40.913	51.8657	30.2299	24.8601	8.26953	64.2051	11.6561
24.0667	5.50722	9.24022	6.97611	98.7207	91.5433	87.5272	70.2909	39.6342	63.9737	40.965	52.196	25.4118	24.514	17.7112	58.8613	11.328
24.1	7.20091	9.22942	8.56088	100.753	92.7224	86.7894	67.6174	38.4319	64.3724	40.267	52.7174	30.1063	27.1209	20.1869	58.2734	10.5295
24.1333	6.57892	10.2218	6.88372	97.919	93.1603	86.6402	68.8743	39.4423	63.6906	39.286	54.3176	28.0515	29.5034	22.0105	52.8447	11.341
24.1667	5.7292	9.06741	7.4373	101.667	92.1895	86.5022	69.0867	39.3309	62.1094	39.825	55.1979	28.4752	32.7826	16.2746	60.9572	11.239
24.2	5.7881	8.59296	7.82477	99.2219	92.2229	83.8442	67.7184	40.031	65.6397	39.074	53.3527	26.6546	25.6863	17.1808	68.7693	8.57246
24.2333	4.96101	9.34922	9.43623	103.101	92.339	86.8725	67.664	38.4591	63.6908	42.085	53.3718	21.4775	19.5596	17.8117	61.0702	9.25383
24.2667	4.54392	8.50304	7.85257	96.561	92.92	89.2968	68.0205	39.3327	63.5248	38.698	50.0252	21.4963	34.5533	19.9056	63.4699	9.44265
24.3	5.92374	9.64962	7.9892	99.8012	94.6655	87.9959	68.5985	39.02	65.7735	39.292	53.9102	18.6014	29.6712	15.0181	61.3222	9.91055
24.3333	7.34729	7.75933	4.2433	101.72	94.413	88.372	67.0778	39.4249	64.0979	39.914	52.2356	19.666	29.7145	21.719	62.3738	11.5733
24.3667	6.23799	11.5085	6.62298	98.4287	92.7176	85.8649	70.0845	39.9692	65.4526	39.156	50.7616	16.2967	29.8812	11.6411	59.3853	10.609
24.4	6.54247	9.72849	7.1872	100.93	95.5267	90.0657	69.0082	40.2608	63.1272	41.206	51.4324	37.0915	28.591	13.449	59.547	10.6982
24.4333	5.65322	9.09027	8.13608	100.427	91.9102	87.3134	67.4213	39.6907	64.6938	40.559	52.2615	30.8072	23.9151	16.4016	58.6521	10.5274
24.4667	6.44616	11.4098	7.80162	100.287	90.8195	87.7029	67.5052	41.4744	64.6458	40.308	51.0086	23.2419	28.6372	19.3758	59.4437	9.20515
24.5	6.99793	8.35033	7.8341	102.234	93.0835	88.3617	69.9406	38.0766	63.9717	41.24	51.6678	21.0021	25.843	7.18836	62.3413	10.9309
24.5333	7.45895	8.98905	6.90388	99.6132	92.9486	89.4107	68.6165	40.3758	64.7619	39.644	48.5936	24.2254	26.0302	17.7059	59.6632	10.581
24.5667	5.35566	8.89863	7.41415	101.394	90.4563	89.9738	66.6775	40.2627	65.0884	39.296	53.6222	17.7091	27.6732	14.7584	57.708	11.0572
24.6	5.18088	10.476	5.80698	99.5641	92.5021	92.338	67.3798	39.8111	65.8418	40.83	51.6187	21.4852	29.7645	25.4296	64.8374	12.2316
24.6333	7.26998	9.94223	6.41805	100.174	92.3773	88.949	68.8838	40.2671	64.2533	39.205	52.7535	26.02	22.9477	14.2176	51.9856	11.3309
24.6667	5.94043	10.0399	7.99517	100.453	93.3621	90.5349	68.5169	40.7548	65.3472	38.285	52.791	23.7705	16.686	17.3561	56.7252	8.5586
24.7	5.97554	8.9564	6.78107	99.3865	95.2357	88.9079	67.9614	40.5544	67.6737	40.653	51.115	30.4441	30.6462	10.5071	57.7937	11.8631
24.7333	6.95361	8.59045	8.37685	99.6555	91.9597	87.4538	67.1278	39.4531	64.5704	41.255	51.8671	30.0106	26.447	16.9053	63.1202	10.8187
24.7667	6.30476	10.3396	8.40074	98.448	91.0962	89.3141	66.9977	39.9509	65.5585	41.549	53.3834	21.6828	21.502	19.3066	64.1927	9.669
24.8	6.36577	9.93771	7.68385	103.001	93.1179	90.6205	65.4676	40.2056	65.3843	40.276	52.052	26.3499	21.8115	14.4828	55.3857	9.10644
24.8333	7.11189	9.31557	9.28654	103.86	93.0153	89.1784	67.2916	40.8165	64.5874	41.737	52.2021	23.1754	21.9215	18.1826	56.0771	9.90491
24.8667	4.79238	10.7804	7.60024	99.2684	93.8303	86.5555	67.5887	38.7351	65.1326	39.492	50.8462	23.6046	25.7486	17.6741	48.9746	9.96499
24.9	5.28736	7.70232	8.96907	100.233	89.8438	87.111	67.7462	40.0734	66.1359	40.583	52.0404	22.2064	25.8941	17.4726	61.9912	11.5378
24.9333	7.81925	7.80278	7.35088	100.377	91.0902	86.468	67.3404	41.514	67.1342	41.327	53.0633	22.9826	23.6256	19.1161	54.0803	11.2832
24.9667	6.48261	10.4853	7.24132	101.294	91.1792	89.7521	64.5517	39.5702	66.5835	41.188	53.6918	27.3554	31.5624	25.9435	53.2232	12.0135
25	5.50243	8.89662	7.01194	103.746	92.4392	89.0582	65.8909	40.398	66.1946	38.54	54.6363	29.6147	26.597	19.8367	59.4544	9.30287
25.0333	7.28379	10.644	9.37482	103.856	91.4083	90.1939	66.5496	40.3744	65.1942	40.705	52.6402	22.5357	22.8372	21.2997	50.2867	8.46664
25.0667	6.97797	9.37961	7.52987	100.843	91.7759	88.9975	66.4356	41.7885	65.1667	41.385	48.973	14.9942	23.1766	18.4267	50.6205	10.1289
25.1	5.63807	11.0953	8.481	102.921	93.1148	89.3658	66.8149	39.6464	65.0399	38.317	50.3658	27.641	29.4039	8.62515	50.8801	11.0718
25.1333	5.99031	9.20254	7.06868	102.551	90.9935	86.7311	66.498	39.0635	63.7131	31.645	52.11	24.6803	19.9969	22.8425	50.7383	8.45916
25.1667	7.14853	9.17089	10.4189	98.156	91.5672	89.9771	67.6753	40.2468	65.1972	30.05	52.7494	22.1816	27.1109	10.3902	59.484	7.95166
25.2	7.40773	8.59698	7.72958	100.992	91.5691	89.579	65.7214	40.141	65.0175	31.288	50.3119	18.242	29.3961	11.9064	39.9222	9.61247
25.2333	4.43112	9.22992	7.17059	101.376	89.5917	87.5406	65.8621	39.5116	64.3397	37.501	50.591	19.826	27.2365	8.38113	53.2213	9.10718
25.2667	4.92418	8.71678	7.2109	99.4829	93.1021	89.4325	65.8196	38.4915	64.4627	41.058	51.6214	16.4247	26.7959	19.9007	50.5171	9.63148
25.3	6.54228	9.36831	6.37437	101.571	89.1723	89.2193	67.996	41.3241	65.3653	40.074	51.6958	50.7224	28.8466	18.3473	44.5968	9.79455
25.3333	6.47973	9.57553	8.08196	102.636	88.5463	88.3782	68.2792	42.5506	65.1528	41.062	52.1673	25.0358	22.5194	15.299	45.7297	9.69707
25.3667	5.1521	8.82403	6.68924	101.315	91.0279	88.5626	67.9328	39.7954	65.2578	39.915	51.2618	53.9141	21.3981	18.7343	49.7597	8.12504
25.4	5.78234	9.50646	10.2237	100.157	89.7355	88.7095	67.8499	37.9033	65.2325	41.031	52.1496	29.3975	27.1353	19.434	51.5698	9.7265
25.4333	6.91908	7.77566	7.91174	100.651	92.0645	90.1866	67.4588	39.2501	64.4599	40.9	52.3297	27.1571	19.0763	26.251	49.0146	8.54475
25.4667	5.83606	8.35862	9.54523	100.669	89.4625	88.241	66.0415	39.0047	64.7671	39.883	49.5496	23.1249	20.3603	12.5427	55.0804	8.87789
25.5	6.08931	9.27362	8.12582	101.264	89.8167	87.7123	66.3682	40.089	64.674	40.329	51.7934	38.2723	19.5057	25.5251	53.9806	8.9983
25.5333	6.32817	8.63289	7.5728	99.9298	90.621	92.3334	68.1558	39.0678	64.7028	40.8	53.3035	30.5068	24.4612	15.1455	58.5568	8.54928
25.5667	6.73221	8.25388	8.97541	101.332	91.4393	88.0689	66.6653	40.7398	64.3447	43.285	52.3113	30.2289	19.7885	19.8581	62.2901	7.73966
25.6	6.676	7.35344	6.37736	97.9496	90.4506	86.9244	67.5027	38.5494	64.657	40.741	52.7924	26.8004	19.5307	25.3924	55.3581	9.43431
25.6333	7.63527	7.53479	7.86788	99.4309	89.3549	90.2796	68.1445	40.1056	66.2317	37.719	53.0777	30.2636	22.7333	16.1791	55.9507	7.77914
25.6667	5.64171	6.5708	8.47409	98.9052	91.4308	88.0793	67.8003	40.537	65.6604	41.5	52.4539	35.3116	14.6892	20.224	54.6315	6.7135
25.7	6.71725	7.10629	7.18384	104.097	88.8362	91.5899	68.2354	39.7107	63.6958	42.168	53.5403	26.6306	27.382	15.6226	55.402	9.52443
25.7333	4.81118	6.38218	6.63474	98.4915	89.4733	90.0561	66.8621	39.3577	61.8918	41.19	52.1148	29.9444	27.6699	23.569	56.1853	10.3318
25.7667	4.82557	5.89441	6.54123	100.406	88.6317	90.5781	67.9404	41.747	64.2809	41.435	51.1062	28.8633	23.7645	25.4773	53.9549	10.147
25.8	4.01134	9.01768	7.85668	101.453	89.6001	87.5036	65.6826	42.3407	64.2477	42.338	53.3909	20.4408	22.2721	12.3305	50.4501	9.43885
25.8333	6.83408	7.84046	7.91753	102.947	91.0556	91.3026	67.1952	40.4021	63.4687	41.528	51.7599	25.1767	27.0987	24.1358	53.0667	10.2645
25.8667	6.0331	8.17853	6.4145	100.927	89.8971	88.5227	66.4491	40.144	62.9843	42.274	52.9978	21.2486	21.2509	24.4437	53.0437	10.2418
25.9	6.40855	7.40669	8.76003	100.165	91.1468	89.7712	68.1424	39.3255	63.7302	40.988	50.7643	17.4089	25.1285	24.115	56.8458	9.855
25.9333	6.16662	8.06576	8.81397	101.67	90.3742	88.8531	67.0768	38.3583	65.4807	39.024	52.5454	16.0447	24.3184	22.4767	48.3059	9.8913
25.9667	6.14974	6.9026	6.2958	103.005	93.2285	91.8501	68.6992	37.5479	65.5615	41.169	49.5817	25.1331	26.9381	21.7082	49.6415	10.7704
26	6.58736	6.129	8.83786	102.493	89.9421	91.8723	66.9733	39.2285	66.5426	40.328	52.6866	24.1885	27.4059	21.5859	50.3282	10.4179
26.0333	6.32893	5.94464	7.48881	100.805	88.9734	89.7336	68.0061	41.038	65.5892	41.204	50.3992	19.2817	22.7894	27.2003	57.3513	9.84728
26.0667	5.734	4.71844	9.5163	104.417	90.3655	88.581	69.8089	40.1487	64.7674	40.301	52.0274	25.1763	25.2746	25.7261	62.9312	9.3925
26.1	5.2016	2.8392	7.7544	105.891	89.7171	89.5907	67.4456	38.1572	66.4836	42.71	51.2065	20.9883	17.5917	21.8038	58.8586	8.96826
26.1333	7.77877	6.0544	6.95203	98.5451	89.7316	88.6317	67.3538	40.7972	64.1332	41.087	49.2248	19.0888	23.7134	21.4114	61.8002	10.5638
26.1667	5.79347	7.37957	3.8213	104.174	90.1397	91.9062	68.8086	39.3086	64.3764	40.368	52.0929	21.8464	26.7392	25.6945	53.188	11.0583
26.2	5.62617	7.57372	8.88918	102.503	92.2659	88.3118	68.5407	39.145	67.0729	43.6	52.2847	31.7303	27.2909	25.2548	54.6398	10.2542
26.2333	5.45043	7.2261	9.22215	98.5023	92.0282	85.7042	68.7657	37.573	67.3705	41.144	52.2499	33.0859	20.9386	22.6202	54.8185	10.223
26.2667	5.28122	5.43251	7.95728	101.31	92.2303	92.0985	67.5172	37.5783	66.7733	41.49	53.1868	32.1943	24.3795	15.1562	55.2227	9.80865
26.3	6.16375	4.94349	7.13811	101.337	91.5773	91.5435	68.5679	39.8673	66.0063	41.557	51.6405	21.5766	33.0498	13.8097	53.5856	11.8354
26.3333	5.10299	4.6137	7.90614	102.919	91.6196	88.447	67.0801	39.3648	65.1939	42.367	50.8475	34.2748	24.4629	34.8337	62.7077	9.76231
26.3667	7.53819	3.99432	7.94123	102.651	89.8213	89.274	67.5997	39.518	66.1158	40.397	52.3809	37.1397	21.3581	20.017	56.3061	9.64276
26.4	6.44961	4.18295	6.39285	101.16	88.1727	88.6867	66.6558	38.9815	64.3313	41.466	51.3027	19.6248	22.1171	19.6249	56.3187	10.3211
26.4333	6.10255	4.8174	9.69305	97.906	88.0112	88.6659	66.877	39.6134	64.6418	41.007	49.7782	34.0444	22.3527	23.9877	58.6626	9.07407
26.4667	5.98436	3.57563	9.2117	101.067	91.5465	89.7901	68.2531	41.9055	65.6549	39.804	51.096	25.115	20.9503	16.7407	59.9136	10.4619
26.5	5.7599	5.216	6.83836	99.4425	91.4887	88.1633	67.0666	39.6665	66.006	41.503	51.7088	23.2252	24.1184	17.0909	60.2797	9.63099
26.5333	5.80517	5.36394	7.97203	101.858	92.5703	87.4282	67.6206	39.946	65.3208	41.913	53.2626	22.6221	24.2434	31.9236	61.7581	9.48471
26.5667	5.66991	5.5596	8.93267	100.202	92.9015	83.9249	67.841	39.8766	64.3472	42.264	52.9671	15.7617	28.496	14.7159	55.0799	11.0509
26.6	6.53748	6.32566	7.59744	100.289	89.516	84.7211	67.4599	38.8123	65.8049	41.107	50.4067	29.3413	22.9961	20.2607	57.5349	9.3941
26.6333	7.43305	3.94811	8.81098	101.738	88.1201	89.2064	66.2565	39.0971	61.4215	40.968	53.1698	21.9791	23.225	18.7712	60.7291	8.82529
26.6667	6.49105	7.08218	8.84626	99.3457	91.8584	86.1843	68.8854	38.8952	63.9225	39.729	53.2189	22.8367	20.5014	27.1469	65.5108	8.03026
26.7	6.22476	4.03351	8.51049	101.895	89.7383	84.1023	68.9541	41.5157	63.8001	39.68	52.4642	29.9999	21.4526	22.9854	64.8351	9.1805
26.7333	7.10633	6.52585	9.18968	102.293	89.4548	86.5824	70.3321	38.2433	64.8861	41.386	50.3815	22.5155	28.1982	23.6216	66.1026	10.5055
26.7667	6.76406	6.51077	8.90225	97.7638	90.9286	86.924	66.8771	38.8998	63.2548	43.147	52.2124	24.1101	27.7021	28.5574	63.1997	11.094
26.8	6.23953	5.47395	8.32179	102.363	90.6664	89.3188	67.9555	39.5661	63.5558	40.852	52.9876	34.2442	31.0163	33.7732	64.5358	8.61979
26.8333	6.78497	4.41101	8.12227	100.238	92.1561	87.5806	67.8643	38.2938	64.0007	40.399	51.0673	22.719	23.3722	21.7082	76.3172	8.40055
26.8667	6.94191	6.26312	7.72267	99.9767	91.7956	87.0735	67.1825	39.2251	64.7178	40.69	51.3696	25.1585	23.36	18.75	67.6909	10.534
26.9	6.80799	5.70026	7.89998	105.244	89.4621	86.9281	68.2279	38.4894	65.695	39.747	51.5149	24.6133	26.0797	29.4106	73.2599	9.62081
26.9333	6.10044	6.55674	9.19266	100.765	90.3808	86.3306	70.0923	40.2251	64.3871	43.939	51.7395	28.0955	18.2645	24.4331	75.9915	9.17842
26.9667	6.16969	5.19114	7.65119	100.533	90.3943	85.6837	68.2191	39.1677	64.311	38.359	51.8657	31.8897	23.9456	25.6364	87.6742	10.8427
27	6.58544	4.76466	9.55568	101.475	93.0752	85.706	66.7791	38.5742	64.7897	40.094	52.9002	35.2174	25.9714	25.7104	74.3343	10.0769
27.0333	6.27042	4.97086	7.46679	99.5635	91.5605	83.9339	69.0963	40.2782	63.2566	42.381	50.4053	35.1609	28.6355	18.7979	68.5659	11.7927
27.0667	6.5935	4.62375	8.62135	100.803	91.2958	87.1575	68.7685	41.736	64.9459	43.95	51.8602	24.0344	22.7255	21.0509	69.0911	9.65514
27.1	5.32822	5.89365	8.68612	103.036	91.5897	87.1395	69.9131	39.6205	65.3628	38.983	51.3464	20.2681	32.5998	18.2096	78.4147	11.6334
27.1333	7.57042	3.95464	9.22645	101.684	90.6284	85.6108	67.1972	40.0546	64.2524	41.981	53.0067	27.0169	22.1088	27.1153	78.6497	8.96421
27.1667	6.20749	3.79766	8.37237	101.255	92.1222	87.5439	67.9515	39.104	65.106	40.88	50.3282	33.511	21.7871	16.5978	74.0986	9.17057
27.2	5.70637	5.1718	7.21277	100.26	89.8778	89.2008	69.4286	40.4412	65.4339	40.825	52.7289	53.2529	24.8374	22.1428	70.5175	10.4581
27.2333	6.87552	3.91596	7.06103	101.906	91.5305	90.3966	67.8564	38.5633	65.0305	41.836	52.209	42.9252	23.7022	19.8155	64.5863	10.2341
27.2667	6.88377	2.92234	13.2154	99.499	90.5054	87.0403	68.0655	39.7089	66.8062	41.305	53.9846	32.1167	26.0864	21.4749	77.6125	10.9601
27.3	6.04345	4.55669	9.08366	100.229	91.7546	85.7765	68.6413	39.5833	65.3395	40.779	51.7074	31.5491	23.19	19.8741	67.5522	8.6898
27.3333	6.73432	16.5824	9.69454	99.1738	90.4182	87.9775	68.2145	39.7291	65.3379	42.509	52.9657	27.3905	26.3908	21.8139	67.7156	9.41935
27.3667	7.01961	4.29397	7.1676	98.9241	91.7157	86.0546	68.9922	38.8365	65.4573	43.331	52.9105	23.5957	24.8968	20.7009	62.0639	8.06545
27.4	5.98647	5.08515	7.86303	100.693	88.4894	86.7809	67.4686	38.9735	66.1277	42.101	49.7762	21.2538	24.9335	14.5407	56.2856	10.0302
27.4333	7.44936	3.71276	8.50657	105.257	90.1738	88.1567	68.4193	42.5459	64.0796	41.687	52.426	19.6152	20.9131	19.2326	67.5269	9.08744
27.4667	4.1771	4.43764	7.57467	99.8359	91.6572	85.2109	68.3255	41.3397	66.753	41.056	51.3362	26.6253	25.9136	27.2691	65.0278	11.1075
27.5	7.2554	5.89416	7.88804	104.313	89.9654	86.431	68.0737	40.4691	66.0116	42.249	52.8047	25.6916	22.8405	25.4293	70.5786	9.48875
27.5333	7.46893	5.1507	9.07377	100.21	90.8444	83.4625	67.5739	40.6679	66.7637	39.629	52.2895	20.8147	27.5532	29.6706	62.8461	9.74686
27.5667	6.58026	7.20902	10.1055	98.3461	92.473	86.4616	66.2827	39.8128	65.9537	39.701	51.8002	24.0215	26.4964	27.078	56.1743	9.72331
27.6	5.97458	4.14703	10.387	95.7114	92.2303	87.7741	69.3892	40.0823	66.5461	41.087	55.1583	26.8937	19.9108	31.1919	55.1725	9.10325
27.6333	7.11342	6.46833	8.83692	98.0025	91.9356	87.4138	69.2385	41.7943	66.3119	40.7	51.2447	29.1392	25.6285	19.4074	54.4819	10.5864
27.6667	5.41955	5.86402	7.58269	99.5423	91.2361	85.8935	67.3876	41.2138	65.5049	42.873	51.3171	31.3149	24.104	27.7567	58.9321	9.79492
27.7	7.39065	6.61752	7.92051	100.638	92.1724	85.2266	68.1546	39.2766	64.5242	40.099	49.5687	23.2414	22.9766	25.7372	57.3936	9.45847
27.7333	7.20321	5.34159	7.17731	102.902	90.3952	82.9108	68.1567	41.5842	64.0215	40.435	48.6693	20.63	30.9396	27.0885	69.6742	11.231
27.7667	5.93698	4.41528	7.66649	101.038	92.6395	83.8106	68.0354	40.1506	64.97	43.054	50.2334	23.4508	31.7614	24.0245	65.1432	11.6218
27.8	7.0929	3.89762	6.96771	101.697	91.346	86.1322	68.1376	41.6826	66.1795	42.098	51.3928	22.454	29.7995	18.1247	70.7254	10.2564
27.8333	6.0164	5.44909	6.12689	100.707	90.4767	86.0822	68.3525	41.1986	66.3808	41.068	51.8514	17.2228	27.3476	26.2195	64.308	10.0842
27.8667	7.02728	5.33782	8.21559	100.267	90.737	85.2433	69.0216	41.2435	64.7232	39.688	49.7707	23.6662	31.6841	25.5513	69.5576	11.4508
27.9	6.76502	7.30622	8.6165	100.859	91.3382	87.4113	67.3983	41.484	65.4394	42.557	51.9517	16.2611	34.4972	18.3475	75.3946	10.7144
27.9333	7.50039	4.61772	8.51441	99.3996	92.3079	87.2149	67.9097	41.1756	65.2787	40.748	53.2496	19.4205	26.3425	31.0012	63.8805	8.77919
27.9667	5.28697	5.47948	8.64356	105.441	93.2924	86.5856	68.3605	39.4278	64.8024	42.149	53.5608	17.9518	30.4529	19.6617	53.3705	10.1378
28	7.09654	6.7951	8.32422	102.649	92.7272	88.5317	68.1625	40.5902	66.4163	40.606	50.7861	19.5631	23.2411	21.4802	55.5599	9.32077
28.0333	8.18282	6.12247	7.05543	101.431	90.9128	87.3843	66.2695	42.407	65.5487	40.472	50.0369	19.2318	27.2937	18.4478	56.9792	10.1971
28.0667	8.00248	7.48933	6.41693	102.855	92.8523	88.6255	67.1166	41.5484	65.6061	41.113	51.7306	19.4979	27.3704	21.9097	51.434	11.5321
28.1	6.18063	6.78555	6.07407	101.151	90.6577	87.22	68.1835	42.4744	65.0539	42.546	52.1905	22.8964	27.8443	19.7255	54.4917	8.38559
28.1333	8.32268	5.94389	7.95523	104.712	89.6299	88.9862	67.0817	43.3443	65.0765	41.346	51.7831	16.4	28.8883	24.9099	45.628	9.61541
28.1667	5.63423	7.66464	7.58157	99.8304	90.8949	88.4185	68.4375	41.2514	65.8713	40.534	50.5343	16.7536	28.0543	23.203	49.272	9.4982
28.2	5.89841	5.7741	7.84716	102.083	91.6497	86.3058	67.4753	41.6081	65.5647	39.87	49.8929	41.7875	27.4026	20.5368	49.5392	9.53841
28.2333	6.46726	6.43241	8.14411	97.6938	92.0554	89.3991	67.8283	42.6148	64.6629	40.503	52.1045	44.1572	17.8995	31.3034	56.2664	9.89522
28.2667	5.64939	6.07324	7.86116	100.864	92.0604	88.5417	67.8805	39.1911	65.9263	41.436	51.8514	43.4268	31.3513	26.2355	50.1907	9.71694
28.3	5.61025	5.28156	5.53299	102.801	90.7143	88.0898	68.8508	42.0252	64.2721	40.987	50.737	42.0183	28.126	19.9056	57.2615	10.2285
28.3333	6.70842	5.11905	9.66804	98.3955	90.8804	86.2056	67.7581	41.6878	64.6163	41.743	51.9141	38.4213	25.683	31.2764	56.9906	10.5947
28.3667	7.21722	5.64852	6.67281	102.985	90.9428	87.1163	67.2211	40.254	65.7996	41.303	50.7022	47.5756	31.5641	28.5839	58.3804	10.6885
28.4	7.3778	4.71191	7.67919	104.827	91.5145	86.0195	68.7777	42.7032	66.1275	42.566	49.349	53.3107	28.5294	27.2693	62.4683	9.56073
28.4333	5.90781	5.52494	10.2084	101.762	88.4003	84.4602	68.2172	41.6915	65.405	40.321	49.334	27.5279	23.9378	25.9385	58.2458	9.79786
28.4667	7.89811	4.41528	8.28633	98.6992	90.8023	84.4953	66.8514	40.7271	67.1748	36.518	49.6165	42.8812	27.1237	25.8115	65.09	10.0007
28.5	8.34724	5.21852	8.26281	98.5822	90.4999	82.8978	67.7501	41.8278	67.1401	30.151	49.4534	32.8033	30.3651	20.4517	67.1662	10.4595
28.5333	6.71226	5.90044	9.13424	99.7535	90.0927	84.1077	67.5078	41.9298	65.5121	30.347	52.9889	51.08	30.3873	28.0482	64.4547	11.2974
28.5667	7.24331	5.1713	10.7786	100.73	91.6337	84.418	67.531	42.6399	65.9157	41.553	50.6483	33.6689	29.6811	23.6906	62.6083	9.91374
28.6	6.42736	4.02647	7.43525	99.2144	90.8035	86.284	66.964	41.6818	65.5131	40.167	51.764	28.1207	34.1144	29.2991	60.7147	9.85635
28.6333	6.72933	4.6137	9.98682	98.8011	89.6476	82.9527	67.884	41.8768	65.8841	41.972	50.29	26.7093	31.4041	23.1498	64.0596	11.1228
28.6667	7.17079	4.96107	10.9486	98.2358	91.6147	88.1522	67.4849	40.008	64.8686	41.306	48.3288	23.8616	33.8582	34.8815	63.2761	11.5083
28.7	4.65079	4.63304	10.334	100.779	90.0608	84.526	68.1482	42.4606	65.6852	39.081	52.8163	34.6238	28.7844	18.4269	49.3967	10.8821
28.7333	7.15736	3.25212	11.2635	102.704	90.926	86.0154	66.1299	42.4147	64.8367	42.579	50.5186	24.787	29.9067	17.7057	54.3505	10.2707
28.7667	6.25584	4.42985	9.37296	98.0308	90.1476	87.5469	66.1993	41.6358	67.0083	39.842	53.0374	31.9747	26.5697	25.3342	61.4082	10.0561
28.8	5.24438	4.91134	9.39144	98.8464	91.2963	84.9217	66.9216	42.5438	64.123	39.492	50.8489	43.4723	30.3473	21.4853	50.5854	11.8718
28.8333	6.75427	6.6346	9.24455	101.061	89.0486	84.7312	65.4258	40.7104	65.2539	39.954	50.1303	29.7761	31.1463	31.388	48.685	11.4337
28.8667	7.35458	4.17316	9.55549	99.8454	88.6854	83.2397	67.0061	41.4996	65.6644	42.146	50.3542	31.3286	29.4956	24.5441	47.4963	10.5854
28.9	6.19886	3.80444	7.4121	104.018	89.6419	84.7455	65.6658	41.5723	65.4968	40.329	49.5844	32.7457	30.5279	18.851	56.1914	10.714
28.9333	5.52526	4.8807	7.03975	103.358	89.9871	84.9574	67.764	40.3997	65.063	40.275	49.6472	28.8734	28.8727	31.2608	49.0752	10.3093
28.9667	7.28398	5.76405	9.32219	99.5387	91.3181	82.3085	66.0031	41.1164	65.5945	40.99	52.7522	30.5116	35.1683	25.2438	46.0652	12.5922
29	6.65719	6.83478	11.1429	103.916	91.0288	81.1483	65.145	42.8486	64.9616	36.966	49.9959	24.6085	32.682	28.5784	42.9189	9.47588
29.0333	7.50615	3.40935	11.1892	100.189	93.2209	79.7996	66.4428	40.881	64.7231	32.547	52.7494	21.2787	31.2835	26.2671	50.2961	12.0519
29.0667	7.43651	5.82107	9.53888	101.505	93.6649	84.2191	66.7052	41.7409	65.611	28.504	50.4586	20.4928	26.642	25.9861	48.5375	9.32188
29.1	7.21607	5.84769	9.48177	105.571	94.1108	83.6597	66.9265	40.3214	66.7543	32.002	48.9341	17.462	32.1308	18.6493	42.5446	11.3769
29.1333	6.0471	3.47717	10.0708	103.378	90.8086	82.3417	66.1694	43.4701	61.6653	40.296	49.9324	21.7302	27.5421	25.0583	45.3278	9.31599
29.1667	7.02671	6.30808	9.71171	101.518	91.7436	86.0395	65.3831	42.4513	65.2963	41.179	52.0404	21.5154	24.9913	24.1995	41.7221	7.55966
29.2	7.44303	6.05315	7.83932	98.2662	91.9865	84.8414	66.3479	42.1219	64.4578	41.912	51.9517	20.2612	35.6695	31.6212	42.687	10.727
29.2333	6.85116	5.19064	6.34302	98.685	93.2563	86.2047	66.3728	40.8073	65.3731	39.999	50.952	26.4963	27.3304	20.0542	52.2987	8.5163
29.2667	6.90833	7.46396	9.336	98.5333	92.3957	79.9607	67.3546	41.743	65.4329	41.651	51.8323	19.2055	23.1833	31.0909	52.0442	9.49918
29.3	6.38208	7.30597	9.60663	103.205	88.4895	81.3555	65.0929	40.1781	64.5846	39.82	52.3884	21.3658	24.4356	31.2024	52.7367	9.01546
29.3333	5.14309	5.53223	8.35016	99.2223	92.9444	84.4531	66.6798	40.5246	65.5179	40.948	49.5264	24.195	28.0227	23.7755	45.7806	8.98653
29.3667	7.844	5.14065	9.73131	99.2979	91.0036	84.8085	68.0104	43.4507	63.6769	41.992	50.6128	20.6877	35.2228	29.7447	52.5297	10.1212
29.4	6.97452	6.22118	7.63364	96.6194	91.7492	82.821	66.6129	40.2887	64.5329	39.82	50.5957	43.5151	32.4925	28.1224	47.4407	10.7134
29.4333	7.31621	7.05003	6.68271	101.369	89.8213	82.5034	66.7497	41.4918	66.1354	40.751	48.5356	22.842	32.5025	30.0572	49.505	9.4657
29.4667	7.11573	6.70116	8.16464	100.156	91.6383	82.4173	67.8188	41.281	66.0901	40.67	50.5794	26.6109	30.9268	26.5269	44.3031	10.1942
29.5	7.01155	6.17295	8.31638	99.0698	90.9653	83.0453	67.0228	40.7745	65.7991	39.673	50.9096	23.9193	26.9398	31.3617	50.1036	9.43002
29.5333	7.67767	6.98749	6.87532	102.505	90.5669	85.1314	66.6303	41.9778	64.9176	42.388	51.4324	19.3716	27.1959	36.122	46.3569	9.87438
29.5667	6.10849	5.94967	8.92334	100.756	90.7014	82.3264	67.427	42.3332	64.6022	40.611	50.4606	20.607	28.011	24.8043	44.614	8.52206
29.6	7.94684	7.98538	9.30987	98.8492	89.5244	86.0611	68.0846	43.923	65.9472	40.991	49.0446	33.4288	26.2581	21.7452	46.617	8.3992
29.6333	6.00796	6.64841	7.07409	101.355	90.1367	81.9505	68.4578	42.3829	66.6114	40.341	51.8602	35.5743	25.5519	30.4176	47.6852	9.92796
29.6667	5.09359	5.162	10.3468	98.5397	90.6812	84.1235	67.1863	45.6496	66.5297	43.55	51.4952	31.5593	27.247	29.2306	40.7029	7.6157
29.7	8.16056	6.75089	9.1042	102.615	90.5813	84.3849	67.2767	42.9018	65.6855	41.362	50.5084	28.4563	27.9982	27.8893	47.829	8.45389
29.7333	8.04123	7.68046	8.15419	101.766	90.2963	86.5288	66.9024	43.1605	64.7841	41.175	51.6214	38.4702	26.6614	15.7389	45.8502	9.0482
29.7667	6.53383	6.00065	7.43077	101.375	91.2971	85.7498	67.5841	44.5303	65.1419	41.13	51.128	27.596	27.9788	26.972	47.4795	8.49362
29.8	8.63406	5.44884	9.21674	101.183	93.583	86.4876	66.9978	40.6656	63.916	39.224	52.314	31.5362	25.5369	21.756	42.2282	8.29854
29.8333	6.59158	4.80585	8.65905	103.532	90.2716	85.8912	66.4777	42.6733	65.0096	39.548	52.8566	35.586	28.8983	26.3891	45.4	8.71641
29.8667	7.74232	6.20385	8.28185	101.484	92.3661	82.713	65.6922	42.6461	66.0469	40.586	51.9633	29.502	24.0367	21.1994	40.9217	10.258
29.9	8.58091	4.93143	8.50601	99.1859	90.528	84.602	67.989	41.9083	64.2574	41.422	51.9517	27.2733	28.3999	29.183	41.0721	9.62915
29.9333	6.14802	6.92696	8.40634	102.405	91.7222	83.647	67.2716	42.4848	64.4534	39.528	51.3942	23.4886	26.762	23.0231	36.6732	9.20944
29.9667	6.92234	7.68398	8.25404	101.733	90.4798	85.6467	67.1668	42.8575	65.2044	41.039	50.5562	28.3385	24.634	31.6479	34.7858	9.15831
30	8.59876	7.56744	7.693	101.726	90.0847	81.9984	66.6509	39.1483	66.022	38.197	52.6457	24.6704	30.1823	41.9159	38.3679	8.33618
30.0333	7.30566	5.42121	9.59824	102.404	90.3044	85.6592	67.4602	42.2651	65.3693	39.887	53.1698	26.1232	26.0097	30.1475	39.5388	8.78936
30.0667	5.86848	7.15678	7.86041	102.285	90.3773	86.2648	64.9088	42.5129	64.3036	39.689	52.6471	25.4266	24.719	27.444	42.5806	9.34395
30.1	7.7899	7.44135	8.23724	99.1028	89.8374	89.6541	67.9404	43.0555	65.496	42.083	49.7912	29.2759	26.3731	27.8629	39.407	8.3466
30.1333	7.20513	7.06535	8.14411	102.752	89.8332	83.0474	65.6014	42.6534	64.3042	42.795	51.7859	31.0974	24.5718	31.9923	38.2179	9.5709
30.1667	7.37223	6.79635	9.08254	104.392	91.6621	85.3748	66.0662	40.4275	64.2616	37.782	51.0352	28.5629	25.5452	29.9621	35.3849	9.78376
30.2	7.64256	6.62908	9.30409	98.3184	91.1537	80.9006	66.9177	43.0089	65.4253	41.484	48.1364	26.5734	26.9876	31.0488	40.3119	7.64365
30.2333	8.72596	6.44899	6.73832	101.632	89.649	85.3807	67.345	40.6122	65.1797	41.988	49.0317	29.7775	28.4432	31.5206	49.3766	9.1908
30.2667	7.7051	5.48601	7.41024	101.021	91.6094	82.1222	67.4502	41.5951	65.2414	38.639	50.3542	30.9475	31.0785	19.3812	42.9637	9.71866
30.3	7.79585	7.1186	8.06441	95.7017	90.9869	86.3854	67.2478	41.7886	64.2256	38.574	50.2655	27.8815	25.1241	28.541	42.8019	8.56902
30.3333	7.80678	6.98699	7.5211	98.3719	90.0169	83.8847	67.0275	42.056	65.7164	32.313	51.214	26.5727	21.8854	30.7892	41.0137	9.15316
30.3667	7.17386	7.52399	8.2337	99.8546	90.7313	86.3488	66.8686	41.525	65.9618	30.332	51.3826	24.6409	28.7511	23.7277	42.7379	8.66209
30.4	7.17194	7.53956	7.62431	101.554	90.265	83.7239	66.9662	40.8	64.3396	32.869	51.5852	27.0581	20.8281	29.6015	39.5841	10.0026
30.4333	7.02095	7.82187	8.8513	98.4468	90.2856	83.7655	66.4714	41.565	63.9988	38.369	52.4403	30.4348	31.0513	31.1972	44.831	10.1214
30.4667	7.59824	5.48249	6.469	99.3424	89.9773	82.2674	66.0188	44.3052	65.2156	38.738	51.4092	26.0358	28.9589	26.4951	42.6252	10.6727
30.5	7.8724	5.08364	8.5844	101.279	91.5725	83.9759	67.4186	42.4969	66.1074	42.483	53.6208	29.9827	28.4399	26.5907	42.8307	9.20036
30.5333	7.82232	5.21224	6.94102	101.993	90.1122	86.9251	66.749	42.3893	65.1728	40.998	52.5427	28.8099	30.3168	24.8731	45.9566	10.755
30.5667	8.02895	5.02964	7.82122	96.6841	87.1129	83.1491	65.9426	41.1825	64.6059	42.358	52.4505	26.4304	25.9741	19.121	45.4408	9.66691
30.6	7.61244	6.8383	8.93136	100.695	77.2218	85.3836	67.9964	43.0765	65.8475	40.264	50.9083	27.5233	23.3672	28.2125	43.5319	8.14588
30.6333	6.20826	6.83755	8.73539	99.7124	87.7703	82.1255	66.4807	40.1568	65.0649	39.921	50.1911	28.123	28.4066	29.782	34.2456	7.68706
30.6667	7.14431	6.70618	8.97989	98.3929	91.1497	85.8496	63.8472	41.1302	64.052	38.931	52.1161	28.5595	28.1199	10.7933	42.2489	10.2395
30.7	7.38682	5.06128	8.76731	99.9239	89.825	85.4676	68.3343	41.0249	66.5728	39.328	52.0479	29.7326	21.901	22.0314	44.4195	6.64128
30.7333	8.18589	5.09343	7.61554	96.2351	88.9234	86.579	67.095	42.4028	64.763	38.762	50.7036	25.8944	24.8935	21.613	35.6926	9.18406
30.7667	5.63788	5.32526	6.79264	99.3085	89.7017	87.4443	66.4293	42.8352	63.9533	38.199	50.8066	23.3484	24.8807	29.2885	38.5965	9.43247
30.8	7.31103	7.41875	9.18706	103.373	91.9298	86.2274	66.458	40.5877	64.0272	39.538	50.0444	30.4501	30.0701	32.6973	42.8518	10.0869
30.8333	7.97581	6.93173	8.04631	101.281	92.3791	86.9262	66.9812	40.4333	65.3744	39.754	51.242	25.8672	29.5028	19.9537	33.8489	9.32531
30.8667	6.35771	6.03632	7.15883	101.284	90.2312	84.3487	67.1622	41.539	65.8984	39.96	51.6432	24.9032	32.0253	24.4596	33.4673	10.7978
30.9	5.58876	6.42864	9.67159	101.07	88.821	82.7644	68.1317	38.1747	66.1903	40.388	52.4724	21.5297	26.4853	29.2781	34.2871	8.76864
30.9333	8.03106	5.74195	7.75795	98.5879	90.2741	84.3242	65.9846	41.6639	65.1567	38.789	46.878	26.907	27.8654	27.7354	37.7394	9.59531
30.9667	6.54937	6.88627	9.23092	96.4432	89.5683	87.8983	65.8028	41.5886	65.2763	41.061	49.6438	26.9129	26.1519	21.3687	39.0391	9.69144
31	6.9893	4.98242	8.87966	99.7023	90.8796	84.0812	66.2441	42.1768	64.7594	41.666	51.7088	25.6119	24.1645	20.6428	43.4619	9.16579
31.0333	7.79105	6.45627	5.14627	101.864	91.2481	84.797	66.4685	39.8332	65.2679	40.258	49.8505	25.3055	24.2995	26.7072	38.9198	9.10509
31.0667	7.64294	5.72387	8.26935	94.7516	90.742	85.6357	67.2512	41.3161	64.6194	43.49	50.0457	25.359	28.5249	31.4143	40.4823	8.80297
31.1	7.03246	7.45341	9.10084	99.5579	89.8731	82.0726	67.3842	42.8346	65.4671	40.818	50.1856	26.1839	26.1597	22.392	38.2528	8.81486
31.1333	7.15544	6.04787	7.95243	101.12	90.4383	83.8138	67.6738	42.3802	66.3218	42.801	50.1706	27.4809	23.8928	29.0342	39.8993	8.43709
31.1667	6.63206	5.44432	9.77125	100.328	90.2689	84.9514	66.8132	41.9692	66.5305	39.68	49.4814	28.1875	27.8877	28.2762	34.0842	7.51135
31.2	7.38106	6.61375	5.85308	98.1021	92.3025	86.9801	66.0558	44.6525	66.7207	42.735	50.3712	23.1114	26.8376	24.7882	31.4781	9.33966
31.2333	7.01577	6.00844	8.05303	100.39	91.7358	85.266	67.9197	41.2382	65.8946	40.32	50.4674	21.7402	38.2009	29.9353	32.49	9.13832
31.2667	7.85302	6.66374	10.6554	98.8554	91.828	84.2936	65.6508	42.8823	65.5647	39.393	49.2964	25.0592	31.4602	25.0159	34.0418	10.1561
31.3	6.37671	6.66474	8.79586	97.068	92.9921	83.8634	63.7182	43.204	65.6172	42.934	49.5483	24.4559	33.7493	22.5987	31.1296	9.95236
31.3333	5.75644	6.90812	10.3203	100.29	92.0129	85.7552	67.18	42.7218	66.2525	41.618	51.8193	25.0734	29.1717	32.7609	32.301	9.52235
31.3667	7.62088	6.98322	9.18277	98.0348	90.2198	81.9493	66.9493	43.7685	64.1337	41.306	50.1576	25.2839	30.4112	20.8864	33.4239	9.42843
31.4	8.82438	7.00206	7.26969	100.26	90.918	83.2413	65.9672	40.9164	65.725	39.243	52.5338	21.8034	30.054	28.642	23.0365	9.78254
31.4333	6.66928	5.14342	8.6346	97.4712	89.7679	81.0932	66.8019	42.1734	64.5444	40.524	49.2903	24.3123	28.381	28.1169	29.0661	10.0722
31.4667	7.82789	7.77917	9.27124	100.436	91.1992	85.9811	66.9426	44.0579	65.9102	42.862	49.7079	27.3064	27.6904	10.9629	31.4117	10.1688
31.5	7.0599	6.72201	7.29862	98.7642	92.6897	84.2281	65.9116	43.2669	65.76	40.889	50.722	24.4082	30.0156	20.775	31.2916	10.0199
31.5333	6.33315	7.90903	7.47537	96.9006	90.3834	85.6728	68.3635	44.8936	66.2746	40.865	47.3366	23.897	25.4041	27.884	28.2346	9.8832
31.5667	6.78248	6.57633	7.97539	102.569	90.5971	87.4565	64.2801	41.9322	66.6498	39.727	50.1215	24.8618	33.5815	29.7975	34.4765	10.7265
31.6	7.19304	6.38142	10.537	93.0965	90.2677	85.2387	68.1749	42.8132	65.0157	41.029	51.4904	24.2344	27.2131	30.6616	38.727	8.59637
31.6333	8.49285	6.76169	8.08271	100.22	91.3163	85.5045	67.3397	45.2522	65.6587	41.505	49.1709	22.0434	26.3236	25.4187	38.1104	10.3734
31.6667	7.22297	5.99337	10.2418	99.8572	89.6417	85.0173	66.2129	44.0131	66.5341	42.17	52.1161	19.679	30.7118	24.7618	36.6765	9.40476
31.7	8.05236	7.28236	8.22642	99.8433	89.1546	86.5814	67.2912	44.1172	65.7125	42.725	50.8796	21.2853	26.6309	29.5113	34.1257	8.57601
31.7333	7.61455	7.36173	10.1809	99.8631	90.7925	85.4057	66.2831	44.125	65.0228	34.243	49.4459	21.4041	25.1196	28.3714	33.5676	7.8006
31.7667	9.47112	8.66379	9.58517	100.309	91.0476	85.2709	66.4289	38.1003	66.6432	29.541	51.8336	28.0743	24.2112	22.1959	32.1402	9.24647
31.8	6.65048	7.82489	8.76432	98.448	90.733	87.5789	66.8264	40.8231	65.0016	28.659	50.8544	23.5196	23.1211	30.9321	39.7847	8.65731
31.8333	5.42166	6.9463	8.23202	99.0716	89.0165	83.724	66.3551	44.3824	66.3533	32.339	52.1318	28.8677	23.7489	26.6384	35.4377	8.61145
31.8667	6.78037	5.91124	8.21429	97.2135	88.9369	84.4327	67.545	43.5739	61.4293	39.79	50.7384	27.8961	24.2045	32.9941	41.6188	8.75932
31.9	7.80947	4.99472	9.41495	99.8408	89.9846	85.7109	68.1067	43.0461	64.7713	43.221	51.5047	24.4332	20.6792	18.8455	29.9663	7.16264
31.9333	8.79291	7.30723	8.63554	100.58	88.6118	87.5968	68.0151	43.8208	64.0274	37.846	52.0766	22.7333	22.3616	28.5361	36.9728	7.64096
31.9667	8.26762	6.50173	8.62434	100.426	91.5797	86.0192	68.2496	42.4796	66.0347	41.209	50.898	22.5667	24.6296	40.803	37.4742	7.76382
32	6.49642	7.21153	7.45242	95.469	90.8268	85.7603	67.3555	42.5752	63.1131	40.555	50.0266	21.53	28.9027	30.9852	39.6134	10.272
32.0333	8.00574	7.70759	9.02356	99.6517	90.1237	86.3752	68.6321	43.4002	66.7686	41.698	51.313	19.7113	18.8796	32.1833	34.5236	7.93511
32.0667	7.40312	6.21465	9.19005	98.2425	89.4362	90.5979	67.7349	42.6382	65.2022	40.958	48.4885	24.0662	23.8706	28.5255	30.7798	8.12075
32.1	8.83819	5.91325	8.03343	98.7244	88.7015	85.9585	67.3668	42.4027	65.458	41.494	49.9263	25.6333	23.0005	23.956	36.2791	8.37775
32.1333	7.94837	5.9454	8.05564	101.105	89.3755	87.3142	66.0277	43.0222	64.6389	38.699	51.2515	23.321	26.0541	23.06	38.7007	8.24361
32.1667	6.75811	8.51711	7.80069	101.184	88.7053	86.8476	66.8621	42.8362	64.4868	39.816	51.9169	25.5647	25.1035	28.8808	35.5305	8.46247
32.2	8.09975	6.32566	9.01759	97.5567	89.2009	84.1258	67.544	44.6415	66.01	40.162	50.5446	24.9834	26.6131	30.4336	36.4066	9.77138
32.2333	7.1094	6.10313	8.03828	96.6486	87.1234	82.224	68.1032	44.8481	66.0891	39.456	50.3514	23.5513	22.3127	26.9299	39.311	7.59007
32.2667	6.20097	7.31275	9.29811	99.8921	91.5952	85.9093	66.4832	42.3143	64.3443	41.263	51.4993	23.845	24.3956	25.7792	33.3915	8.09684
32.3	9.10314	6.52484	8.53195	99.5387	90.2513	84.8936	66.4432	41.8343	64.1614	41.208	51.5921	25.4552	39.2804	30.9693	38.8654	12.5365
32.3333	7.38816	7.61416	9.36736	99.302	92.1086	85.8487	68.1691	42.2252	64.1275	40.945	50.7295	25.0311	32.6609	26.8501	38.5614	11.1889
32.3667	6.54093	7.62219	8.02018	101.793	91.4136	85.5715	66.0651	43.7343	65.6034	41.446	51.7743	26.0097	26.4914	28.1648	38.9663	7.51025
32.4	6.85576	4.97287	6.85162	100.86	91.986	86.4382	66.4091	42.5225	64.121	41.677	51.4351	20.7351	21.0698	32.3901	40.4177	9.40525
32.4333	9.20195	5.4727	9.14096	96.9634	89.5377	84.2136	66.0311	42.33	64.5124	39.876	51.259	23.5805	28.251	27.5608	35.6841	9.29968
32.4667	8.55137	5.69724	9.27105	103.174	87.8795	85.6407	67.1782	41.5568	64.942	39.873	50.8912	25.9318	24.4868	33.3813	40	8.96458
32.5	7.14335	5.34762	8.94909	96.2358	91.0301	84.4494	66.2366	41.2129	64.4691	42.34	50.028	26.4579	19.1629	33.763	35.611	7.96061
32.5333	7.16388	4.57	9.44108	99.7447	90.687	84.0037	66.9923	41.5949	63.8314	40.425	48.4086	28.1658	32.6337	25.2653	33.6506	9.24071
32.5667	8.82438	6.01572	10.149	97.1555	90.5593	83.4557	67.4992	43.6829	65.1326	40.345	52.2192	26.4856	30.6323	37.267	38.025	9.41555
32.6	7.91672	5.70327	9.28001	100.652	90.924	84.0264	67.7272	42.3965	63.4308	42.322	51.3682	29.6713	25.5435	33.3229	32.5002	9.17143
32.6333	8.235	4.94173	8.20197	98.3494	89.1684	83.6708	67.5987	41.5844	64.6101	41.547	50.591	27.5447	25.2185	27.5234	41.6877	9.75728
32.6667	8.2279	4.93168	8.8931	96.3792	90.5225	86.1238	67.4746	41.5095	64.5467	42.182	50.1331	24.4156	29.4695	31.5363	39.7493	8.07023
32.7	6.36423	6.30808	9.43866	96.1829	88.525	85.5746	64.7281	41.37	65.1585	42.666	50.578	26.4225	24.1395	31.9341	43.8203	7.80563
32.7333	8.35702	4.50746	8.5648	101.85	91.9989	81.6285	68.1451	41.9698	63.4146	40.931	48.2892	27.7315	31.8152	31.2076	38.1059	9.09197
32.7667	7.03975	7.25574	8.23967	98.3136	91.9153	85.3705	66.0353	41.6411	63.6522	43.067	50.5609	25.492	22.8183	30.6668	37.3034	10.2703
32.8	8.77891	3.19938	6.6911	97.0236	92.5115	87.6028	67.1572	41.6747	63.752	41.763	48.5437	26.819	29.17	27.6823	39.2757	9.04955
32.8333	7.77743	4.27387	7.96512	99.6824	90.4251	86.3091	68.7264	42.0123	64.4727	40.338	49.1272	26.9676	28.7683	28.4192	35.9502	9.53817
32.8667	7.58443	4.31707	6.03842	98.1566	89.5086	85.6617	68.4363	41.9406	64.4785	41.273	50.1215	23.8857	19.7341	36.4506	36.3215	8.8221
32.9	5.97669	5.58497	8.6081	94.9424	89.2002	82.5357	66.9162	42.8332	63.7977	41.488	49.4636	27.1722	23.6911	34.9505	35.1774	9.68273
32.9333	8.23097	7.29467	8.3371	98.3247	89.3582	88.0506	66.7843	41.8349	63.3137	42.725	52.0766	31.4054	26.0703	30.0947	36.4957	8.69679
32.9667	8.00976	9.53559	7.73686	97.3278	89.6492	86.4187	67.8276	41.3085	63.921	40.339	49.6438	30.2871	28.4933	31.2076	37.1531	9.37693
33	9.62556	3.76476	9.08217	97.2761	90.8364	87.0365	66.8986	40.9511	64.1765	42.331	49.3503	23.826	24.8212	30.6937	32.7195	9.64337
33.0333	8.74687	6.53564	9.22831	99.2855	91.511	83.8876	68.8022	40.7347	64.6564	43.582	47.3059	29.3968	26.757	28.1916	34.9777	9.09295
33.0667	8.04852	5.48375	7.25159	93.8748	91.9465	84.1993	68.3146	43.6075	63.9349	41.438	47.3973	28.0581	27.4393	31.3776	37.7675	8.54144
33.1	8.68029	5.34661	7.77512	97.1355	94.5832	83.275	65.772	42.322	64.4073	42.654	48.8106	27.782	32.7859	35.0458	39.9409	10.2049
33.1333	7.69417	5.69699	8.6333	91.7003	91.9356	83.7252	66.9617	42.0498	65.9845	41.045	50.9233	26.8707	27.342	34.6903	38.6574	8.75393
33.1667	7.40581	6.39047	6.71182	95.0074	91.6384	81.0075	65.7796	43.2457	62.5967	41.466	49.6206	22.1735	26.5486	30.9904	36.4373	8.56203
33.2	8.23826	5.591	7.82812	103.071	91.6817	82.2502	67.292	42.0687	64.931	44.183	49.6731	25.7077	30.7201	40.5428	36.968	8.48773
33.2333	7.67978	3.83458	8.86791	95.5607	91.3981	88.2808	68.408	41.4557	63.3319	40.029	50.3221	25.6663	26.7959	39.3767	39.7749	9.47858
33.2667	8.58878	3.90189	6.95744	98.6339	91.3999	84.537	68.694	44.5276	64.2821	42.154	49.5448	22.3558	27.1431	33.217	36.784	10.1776
33.3	8.05255	4.47883	7.53752	95.5389	90.2858	84.8866	66.6856	44.7532	64.2444	43.7	48.5164	30.2582	35.2228	33.5721	36.7708	9.8642
33.3333	7.95662	5.00301	7.16125	96.0285	91.1504	82.7037	67.8088	43.5963	63.4939	43.141	52.5583	24.5044	31.8013	31.6903	38.9812	9.1816
33.3667	7.60457	5.89365	7.09574	95.5986	88.4872	82.995	66.0167	43.2639	64.9564	41.087	49.9993	27.5164	32.392	34.4519	41.7128	9.13428
33.4	8.16728	4.83197	8.12171	92.696	89.0593	81.4961	65.6508	42.2867	66.054	41.234	49.7773	23.813	31.7147	34.4043	39.4302	8.64443
33.4333	8.65037	5.11956	7.80853	96.5846	88.2892	83.2794	66.8142	40.7561	64.3392	42.452	50.6067	24.6912	28.3121	34.2664	33.3169	9.37399
33.4667	7.31852	5.14317	8.36267	96.8735	91.2113	80.0734	66.4775	42.8689	62.6791	40.119	52.5671	28.6986	26.9348	29.4	35.6132	8.81327
33.5	8.0161	5.65053	8.91755	101.555	90.9882	82.38	65.837	43.787	64.4666	39.829	48.6014	23.764	28.2032	29.2302	41.4276	8.38289
33.5333	7.04129	6.86995	8.40485	98.3841	89.2384	84.7348	66.3306	43.0099	64.7234	41.77	51.3498	25.6526	30.8896	31.9444	39.7393	9.20171
33.5667	8.31596	5.04019	9.38901	98.2985	90.4594	84.6115	67.2881	42.0117	63.5539	40.411	52.4183	26.6806	19.3085	24.29	39.7726	8.63205
33.6	7.90041	6.04586	8.73539	98.0046	90.1633	83.5377	65.6899	41.2711	64.8493	41.649	50.521	25.3395	21.0198	30.9163	37.0981	8.66135
33.6333	8.31462	5.93183	8.7436	98.4427	89.7465	82.7426	66.0542	44.0421	64.7037	40.531	50.7984	26.1443	31.0291	35.2369	38.0892	9.59126
33.6667	7.44782	5.25368	9.41663	98.5427	91.0096	83.1995	65.5367	43.5931	63.6575	41.127	51.7733	22.6354	21.3037	31.812	36.8783	8.59747
33.7	9.19619	3.18657	7.86732	96.8023	90.7404	84.4444	67.2091	41.2082	63.0255	41.768	51.6139	27.0078	30.3218	27.8575	38.4146	8.15557
33.7333	6.87591	3.58115	9.09094	96.7588	92.0244	87.2171	68.0062	44.0911	63.4254	40.138	49.1989	26.0074	30.8596	32.4377	39.7054	9.07162
33.7667	9.35255	3.29181	6.78349	97.9591	91.7332	84.4517	66.0246	43.132	62.7288	39.902	49.1587	23.489	27.9932	39.6949	33.5237	10.072
33.8	8.83972	3.12654	9.34869	95.1165	90.4802	84.4892	68.0969	42.2433	64.7157	42.933	49.5724	26.2707	26.5714	31.7856	34.57	8.55958
33.8333	7.09385	3.02331	7.83167	95.1759	88.8167	86.9403	68.0522	42.4091	63.2996	41.03	50.3471	26.6122	29.4845	25.0055	34.6819	9.01203
33.8667	7.9407	6.14081	8.99706	94.7612	86.8218	85.8753	66.5042	42.6378	62.4555	40.154	48.3853	24.6992	29.7212	32.8988	36.0798	9.26081
33.9	8.79157	4.18396	9.6365	97.257	90.1042	85.6139	67.9792	42.1753	63.6661	42.34	48.5289	27.4507	31.8264	25.949	40.6949	9.44265
33.9333	6.77768	3.59723	9.06724	99.5995	91.7787	87.8244	67.212	41.4168	64.4217	40.968	51.2055	26.4754	30.4768	33.6938	31.248	7.84364
33.9667	8.84893	2.46471	9.02021	96.7443	91.034	85.9663	69.1259	41.6674	63.5474	42.797	51.0513	25.4107	28.9827	34.5473	32.706	9.28362
34	7.23161	5.3544	6.9524	93.1637	91.8498	84.5934	66.7538	45.1293	62.8332	40.34	50.5256	25.3418	31.0502	33.2539	31.2552	11.717
34.0333	8.04909	3.61632	9.63351	96.3432	90.4152	89.8887	67.1028	41.0424	64.0615	41.265	50.6666	26.1236	32.5486	36.472	31.4247	9.07285
34.0667	9.10966	2.54107	9.85953	94.2985	91.0196	90.4025	69.048	44.077	62.454	40.383	48.8695	24.7602	28.8933	34.4151	29.795	8.40938
34.1	8.53122	4.49591	7.68217	96.4613	90.8649	85.7238	69.2004	43.2989	63.7748	42.573	48.5915	23.9055	34.156	29.6227	34.4181	11.6137
34.1333	7.14911	4.51826	8.13123	99.5103	91.6103	83.7957	68.3406	42.4951	63.0347	41.512	50.0401	25.0563	28.3105	29.2147	33.5729	9.54111
34.1667	9.25509	5.89541	8.18816	93.4476	89.1384	85.7426	67.3728	43.625	63.3522	41.766	48.469	22.6129	29.4278	27.3062	35.605	8.75319
34.2	7.10709	5.09042	6.74019	95.784	86.8983	87.2303	66.3088	44.0513	64.6434	42.501	48.384	22.5827	28.8966	30.5663	33.0491	10.7388
34.2333	6.64492	5.39609	7.50206	98.3016	91.3314	86.5292	67.7938	42.505	64.7134	42.418	50.8965	20.8799	30.0012	31.8226	35.2147	9.19521
34.2667	9.69731	6.23449	7.9892	97.6664	90.6873	81.0012	68.2039	43.2164	63.9441	43.055	50.0606	22.9553	28.9266	38.9048	33.8805	8.68391
34.3	10.4099	5.72135	8.9672	94.0759	89.0323	85.5649	67.4761	44.3631	63.4239	43.011	48.9301	20.8758	32.2575	28.6156	35.8397	9.24598
34.3333	8.38426	4.67122	8.16987	98.7365	91.1301	87.3833	67.249	43.3787	63.0495	42.473	52.3201	19.8262	32.4286	30.6723	38.3486	9.7666
34.3667	8.53353	3.55001	7.46175	97.4208	90.2517	90.525	66.9726	43.7564	61.3576	42.065	50.9005	19.3781	28.216	34.0491	40.6802	8.98285
34.4	9.59755	5.29387	7.88057	95.6986	90.6701	85.9287	67.5483	43.2415	61.6651	43.632	49.7088	19.8778	28.7216	38.3854	35.4279	9.04906
34.4333	8.18148	6.93651	10.5301	96.9722	89.0734	86.3675	67.8181	41.8786	61.6187	41.624	52.3577	20.3546	32.6464	33.6147	36.6139	9.29367
34.4667	8.31232	7.37027	8.72998	96.9315	91.8806	87.1926	67.4976	44.0632	62.1116	42.308	48.8083	20.6322	31.3252	41.5606	29.8965	10.1064
34.5	9.78288	7.71312	7.45876	98.1265	89.818	88.6908	67.2425	44.7417	64.3708	41.855	49.5783	22.6578	38.667	34.4677	35.56	9.93875
34.5333	8.58533	6.67403	9.55699	96.801	90.5988	84.9253	69.5231	46.1911	64.5133	39.807	47.8557	17.7207	31.0963	30.699	37.831	9.20515
34.5667	6.7514	4.38539	7.99666	97.4952	90.1354	90.1017	67.8032	43.4329	61.8498	43.574	49.5401	18.8739	30.4173	30.6141	42.2208	6.67512
34.6	6.88147	5.96775	7.09817	96.4747	91.3802	87.4216	65.7151	43.787	62.7588	41.699	51.079	21.0164	23.8978	34.8231	35.362	8.72573
34.6333	7.40658	6.6557	10.2231	95.066	92.6997	85.0988	66.9501	42.8849	64.2065	42.83	50.2213	18.7378	31.3269	32.6602	35.1473	10.7392
34.6667	7.32063	7.16004	7.89588	95.3711	90.7668	85.1605	66.3302	44.11	64.3483	43.367	49.6383	18.0377	31.1846	29.2726	35.7621	9.35192
34.7	8.08632	6.50098	10.2692	95.7001	92.1242	87.2714	67.5996	40.9171	62.853	42.653	51.5263	20.3216	34.4894	28.5946	42.7741	9.68947
34.7333	8.21313	6.67253	8.14579	96.2159	91.4556	83.4659	67.6434	45.4519	63.1926	41.941	51.0823	22.2941	28.421	31.1813	38.9914	9.28828
34.7667	7.64371	4.46501	7.99106	98.649	89.1453	86.0205	69.2094	43.9499	62.4143	43.341	48.9986	22.8824	25.4219	28.8276	34.0091	8.02903
34.8	8.96443	6.48214	8.42743	95.9784	88.385	87.2499	67.4222	43.9607	63.3266	41.697	52.1567	18.5687	24.1445	28.1121	35.2915	8.55566
34.8333	8.29121	3.85945	8.18909	96.758	89.8723	85.1012	67.803	44.2212	60.8424	44.015	50.9275	21.0763	29.8778	29.1666	34.4938	9.11993
34.8667	9.69808	5.39433	6.90574	94.0163	93.129	85.2509	65.577	43.9024	62.6881	40.434	49.4176	19.4045	33.4921	25.4189	29.7428	10.2618
34.9	8.6567	5.79771	8.48324	95.6742	89.4162	84.5826	67.3312	43.4697	63.3187	41.596	46.5968	19.4632	32.8142	30.6937	36.3644	9.31464
34.9333	9.89511	5.28457	6.592	95.509	85.8936	84.7923	67.4697	43.151	63.8401	43.532	49.2378	22.8205	27.6987	24.8996	30.1742	9.79603
34.9667	8.60969	5.84016	6.81821	97.7137	89.8537	82.7182	67.9083	43.4808	64.4598	42.881	48.7641	22.4141	25.0713	29.1085	36.823	7.47653
35	7.31103	6.78379	7.34099	97.7765	90.9269	86.6892	68.7706	43.2001	64.2832	40.231	48.9104	21.57	26.2542	34.5	32.0214	9.6061
35.0333	8.46235	7.05807	9.34496	98.1148	90.929	85.0985	69.8996	45.5117	63.9057	42.354	49.0764	19.4819	20.5636	30.4444	42.908	8.08102
35.0667	7.88736	4.24775	7.04964	97.9374	90.9486	84.0314	67.8447	42.5314	62.8003	42.855	49.826	17.8592	30.464	31.4466	42.1174	10.76
35.1	7.60284	6.612	8.90579	96.8183	90.0964	85.0339	68.9369	42.6326	63.0125	39.548	51.5974	18.1349	26.0958	35.2527	37.4213	8.39675
35.1333	8.38139	6.8275	10.2026	96.9913	89.5751	88.3798	68.4788	46.0992	60.6549	43.82	48.7707	21.2997	32.0508	39.3131	35.9557	9.04771
35.1667	7.38355	4.09253	7.86732	99.5863	90.575	86.2757	67.7231	44.4178	63.7247	41.168	48.7806	21.2019	20.7948	32.3261	35.898	9.43162
35.2	6.61767	4.27011	9.89481	99.7564	89.7024	88.462	67.5175	45.6724	63.2972	41.907	49.5849	20.8148	27.2181	33.5665	42.6459	9.28215
35.2333	8.48077	5.56437	7.3688	97.6193	90.0195	83.069	67.115	43.9698	62.5387	42.458	50.4624	20.7731	25.2985	24.5021	43.0392	8.72143
35.2667	8.37563	6.59994	8.40821	98.1481	90.0248	81.0968	68.2168	45.1462	63.2105	40.951	50.7444	24.5796	29.9051	30.0679	36.5435	9.73729
35.3	8.10665	6.19958	8.54726	100.895	89.9845	77.4258	67.7624	42.9383	63.2812	40.656	49.805	22.5716	26.8581	32.1621	37.9417	8.78875
35.3333	8.00132	3.90139	8.61389	97.1786	90.8604	84.4945	67.668	42.9832	63.5355	42.942	49.7608	19.99	28.7011	36.0052	28.795	8.48001
35.3667	7.11458	5.29186	8.39925	99.4341	91.3677	84.8476	67.6818	44.5996	62.2172	42.265	50.7391	21.1272	29.7067	33.132	35.1689	8.40374
35.4	8.83224	5.4418	9.46236	95.1195	90.5117	81.8831	69.0897	44.8606	62.4599	41.517	49.6594	16.7137	25.8786	28.5202	38.8127	9.21349
35.4333	8.97901	6.07701	9.29681	98.1495	90.644	82.3145	66.2447	46.5291	63.8261	42.146	49.0876	18.6956	29.2728	34.1395	36.2126	9.74723
35.4667	9.17624	3.56056	7.69076	100.852	91.0041	82.4208	66.8696	44.8316	63.1355	43.215	49.5335	20.0816	28.0593	26.5797	36.8136	8.83632
35.5	7.68457	3.27824	7.87833	99.0895	91.0357	84.6261	67.6712	43.8356	62.8207	42.291	51.0586	22.8458	22.7544	36.4453	35.7903	8.70991
35.5333	8.16498	4.05837	10.3875	99.3777	90.5528	82.2356	67.9051	42.3298	62.5989	41.715	48.5006	15.9729	27.7649	25.2759	33.67	10.1309
35.5667	7.9077	2.26076	10.8577	101.057	90.3625	83.3661	67.7769	43.5315	63.3485	43.181	52.2608	19.2212	25.9708	30.7039	38.4117	10.5349
35.6	9.11197	4.42809	7.46959	96.9032	91.0449	81.0487	67.3947	45.7684	62.268	42.125	51.3919	19.5013	29.3433	27.9053	36.7045	9.1572
35.6333	7.04589	3.74969	9.50398	96.5415	90.9536	86.1338	66.7712	43.6756	62.5617	42.523	50.7266	21.6144	31.3202	30.8209	39.2946	10.4584
35.6667	8.8522	3.57563	9.89499	97.1114	91.3677	85.3188	68.5811	44.3591	60.8147	43.281	50.639	20.7835	24.2084	30.434	35.0986	7.78049
35.7	8.31117	4.19978	8.01626	97.0895	90.6963	83.4435	66.7194	43.5107	61.8435	40.683	50.2793	20.3697	24.7812	35.6289	34.2063	9.44633
35.7333	8.80999	6.64666	7.9235	97.9418	91.2349	78.1368	67.1467	43.8991	60.8156	42.057	52.135	22.883	26.3314	32.0083	41.2721	9.46999
35.7667	8.77143	3.90516	8.52374	97.309	90.6088	81.5053	67.9648	45.3406	63.0302	42.028	51.249	21.6386	26.7253	33.5776	33.365	10.4744
35.8	6.51196	4.8169	9.19509	97.7987	88.8803	82.5361	68.967	45.3799	62.3586	42.434	50.2503	16.8813	28.7411	27.8468	29.2467	10.1596
35.8333	7.65292	4.8272	9.86551	96.4596	87.1149	84.2308	67.3492	43.0087	61.0183	41.639	46.9552	21.9973	27.2276	29.3684	35.4786	9.84679
35.8667	8.4234	3.31667	8.46868	98.694	90.2474	86.1437	68.2831	45.0664	61.0221	42.661	51.3386	22.2418	26.4931	25.6735	30.4077	8.67643
35.9	10.3642	3.13633	7.21874	97.8571	90.6615	82.5903	66.8112	39.2567	59.8181	43.868	48.3056	24.4499	27.646	38.2001	40.4685	9.03435
35.9333	9.59697	3.98252	8.1876	95.8637	89.2388	84.7991	67.448	44.1283	60.6832	42.835	49.467	18.1002	24.7835	32.0133	36.3414	8.0099
35.9667	9.05921	3.39227	7.56869	94.5726	90.4748	78.5791	67.2357	44.4256	60.5211	41.042	52.5566	24.1263	25.9519	31.5896	34.5402	8.60017
36	10.1223	5.42422	8.62247	93.5532	92.2038	81.5684	68.1525	43.8621	61.8877	42.346	48.7924	19.7882	24.389	29.9353	29.368	8.75957
36.0333	9.07168	2.78395	9.11595	95.3525	90.8003	81.4169	67.5911	43.5844	62.78	44.65	52.0039	24.9439	22.6216	40.4797	34.8805	7.89231
36.0667	8.82821	3.75144	9.04092	96.1462	89.7822	81.2123	67.499	45.9515	61.0009	41.036	50.6752	19.5257	29.6617	42.8173	43.258	8.37615
36.1	7.86146	3.84915	8.55267	97.5439	89.2313	80.7172	68.9746	43.5866	60.9785	43.93	50.0112	20.2204	22.3793	38.2105	37.0713	8.04485
36.1333	9.25394	3.49852	9.46217	97.1791	91.6123	81.8494	67.6493	43.197	62.0023	42.938	50.7786	22.5504	20.4747	38.8254	33.5929	9.06659
36.1667	9.18372	3.29633	5.27991	97.2913	92.0297	83.7634	67.9672	45.4646	60.2818	41.177	53.0592	19.1389	27.7165	26.7178	34.8987	7.65726
36.2	9.62383	1.79485	9.41365	97.4642	90.5154	83.3916	67.2901	44.0065	61.4741	42.962	50.4874	18.7342	29.0839	25.0423	37.7593	9.05494
36.2333	7.90137	3.77154	8.59037	95.7665	90.2272	80.5783	67.4727	44.8925	60.6859	42.971	50.7872	19.0665	26.5603	35.7615	36.3863	9.67034
36.2667	9.39649	2.78947	8.53102	95.5851	88.4343	82.6327	66.8176	44.7578	61.3301	45.965	50.2081	15.9418	25.603	26.315	37.0491	8.51556
36.3	9.88974	0.83865	8.49369	94.4301	90.0677	84.7733	67.3863	44.0285	62.7979	42.237	48.8168	19.3639	24.1134	32.7449	39.7468	9.5752
36.3333	9.43793	3.07631	7.60621	98.1211	89.8774	84.4237	68.8065	45.679	59.8753	42.403	50.7272	20.826	22.8661	37.8821	36.5206	9.43726
36.3667	8.99225	2.2894	8.38805	95.4125	90.5488	86.6025	68.4145	41.672	60.4468	44.76	50.079	21.5983	17.1616	38.6662	40.6311	8.36217
36.4	9.43927	3.78133	8.10137	97.1584	90.4558	83.6409	68.0759	45.288	62.5478	43.585	51.4855	20.1797	23.8539	34.0173	36.9757	10.046
36.4333	8.40921	2.98814	8.94947	95.5068	89.5543	84.7121	66.4592	44.7218	61.3346	42.114	53.6218	21.6675	24.1873	21.4857	36.5707	8.93012
36.4667	8.15807	3.04792	8.20085	97.9565	89.2505	83.2806	67.4699	44.2689	60.9459	43.718	51.0065	20.9965	33.8743	27.184	41.3704	11.2828
36.5	9.71324	2.95373	7.63868	96.2798	89.3317	82.113	66.6168	45.5264	61.2467	43.256	51.1264	22.3454	28.8133	38.2794	43.0053	9.93961
36.5333	8.23443	3.96494	8.04631	92.9717	90.9404	80.2125	68.0202	40.2925	60.2949	42.625	48.4552	17.6218	30.3101	36.5408	38.274	9.66704
36.5667	9.39169	5.46039	8.84719	99.0786	90.7998	82.9531	68.714	42.7206	62.0815	44.983	50.3952	15.8096	33.8504	27.8947	43.1688	10.7079
36.6	10.637	2.64731	7.94832	96.4028	92.4835	81.4809	69.0059	45.145	62.8815	44.563	47.6627	17.8736	28.2332	31.0591	43.8032	8.77293
36.6333	10.2677	3.77706	8.04668	95.4116	91.0057	80.752	67.107	43.4391	60.0132	42.009	51.6495	19.7461	20.2375	24.3748	35.2871	8.20327
36.6667	8.55156	1.15839	9.51966	96.2725	91.5469	83.5654	68.4892	44.8273	63.3602	46.507	51.3728	18.8031	23.0572	30.8099	35.4958	7.94578
36.7	10.0586	4.247	9.17008	99.135	89.9059	86.9985	69.3126	42.2727	63.4043	45.219	50.2997	19.1506	20.9609	39.276	41.6569	7.311
36.7333	10.7159	2.29793	7.94515	97.678	90.271	83.1178	68.6955	41.2221	65.368	45.578	50.1844	19.0517	20.3764	31.462	34.3903	7.95031
36.7667	7.46989	4.26785	9.60327	95.3006	91.4921	81.6492	68.347	43.2179	64.7171	42.798	51.7312	16.545	18.3962	33.4819	40.0743	7.31578
36.8	10.7076	2.85176	7.89588	96.6298	87.9154	78.6851	67.5342	43.5475	63.4504	43.247	53.2437	17.8473	28.9127	35.0406	34.7223	7.83199
36.8333	8.55962	3.19159	8.26711	97.1748	89.219	78.7976	68.408	42.6659	64.3432	46.795	50.8919	17.8081	24.924	26.0977	39.1601	8.77698
36.8667	9.09048	2.0317	9.16355	97.7096	89.0613	82.9084	66.0666	45.4622	63.8807	42.793	50.7556	12.4292	21.8126	36.0691	42.7141	8.82848
36.9	8.16824	2.904	7.73966	95.443	87.8	80.3812	68.1957	43.9743	64.7431	44.627	49.913	13.1761	31.1513	24.6239	40.9088	8.69998
36.9333	8.24018	2.72241	8.68854	95.8312	89.4529	80.6175	69.2402	42.9262	63.5553	44.573	49.7226	12.3666	25.3657	30.5983	37.5514	8.19959
36.9667	8.79445	4.40498	8.69956	95.1958	91.0365	81.3943	67.7917	45.5093	61.2279	45.878	49.4321	14.2114	33.1365	38.0038	48.1694	8.48859
37	7.24638	2.7734	7.95094	96.2773	91.6503	82.5441	67.9682	44.2934	62.5172	43.426	51.3333	17.4222	28.2049	36.0691	40.0083	9.28411
37.0333	9.90989	2.73095	9.01629	98.1496	91.3723	82.5059	68.8953	44.2654	63.4336	43.714	50.4321	17.1642	21.6482	27.6451	42.3584	8.3054
37.0667	8.56192	3.26543	8.78242	96.5369	93.9225	82.9515	69.9641	44.1406	63.5115	44.751	50.9934	14.911	24.4595	35.581	46.7791	8.60581
37.1	8.87215	2.04677	7.98546	98.7405	88.9207	79.9604	68.8618	45.0346	62.4071	43.771	50.11	14.6892	27.5276	29.3738	40.3088	9.40133
37.1333	8.61717	4.56372	8.41661	96.8545	89.1423	79.5559	69.4955	43.4843	62.8393	43.894	50.5112	16.1661	32.4353	33.9483	46.8048	9.69916
37.1667	11.3647	7.03898	9.01087	97.8569	88.3762	81.7513	68.7473	45.5294	62.3262	42.794	51.1001	15.6707	26.7509	29.8401	40.7128	8.90033
37.2	9.40051	5.51891	7.92929	95.829	92.4806	83.9556	67.6681	45.3989	62.956	44.859	49.6818	17.2163	25.7724	33.3015	42.7004	8.55259
37.2333	9.95114	4.23695	10.2407	98.2289	90.4783	81.4287	67.8542	44.5188	62.4804	45.603	48.4874	16.8153	23.22	29.6704	41.5294	8.23478
37.2667	9.64532	1.96288	9.19789	91.977	89.4683	83.0085	67.7743	44.7522	63.2669	44.434	51.7931	17.815	23.1161	38.1152	44.7874	7.49505
37.3	9.21442	3.38976	7.80498	100.214	89.7165	82.9495	69.2318	43.0961	63.146	44.585	50.328	14.7656	23.4311	38.1786	45.3521	8.13276
37.3333	7.78952	3.90667	10.5856	97.9266	89.5728	84.0342	69.5239	44.4526	63.2056	44.021	51.9848	18.133	24.6612	34.2557	46.6145	9.11993
37.3667	9.34737	4.62676	9.12025	96.2796	89.8494	84.4264	68.3479	43.6823	63.3558	42.928	50.2523	18.6305	20.1364	25.0373	46.4465	8.89616
37.4	8.9109	4.12568	10.1951	94.5202	90.4639	81.6542	67.5495	44.017	60.6818	45.641	50.0935	24.8079	21.9438	35.2526	46.9273	8.10481
37.4333	8.81651	3.13558	8.01477	96.1082	89.4797	81.1422	67.6319	44.0554	62.9499	44.849	49.7977	18.8391	20.9848	30.8951	54.1065	7.73868
37.4667	9.34891	2.08118	8.56499	93.9208	88.6747	79.7482	68.4421	45.2502	64.1647	42.076	49.8366	24.1957	21.8915	31.3508	44.6915	8.10897
37.5	9.66086	3.52163	8.21709	101.572	89.9782	83.3637	68.3454	43.0829	62.7472	45.089	50.9835	22.3291	26.4086	31.6265	46.6577	8.77379
37.5333	8.29774	1.94354	10.2347	97.5286	89.9058	78.2946	66.3725	43.2064	63.6769	42.614	50.7476	22.4753	19.6269	28.4244	45.1383	7.10685
37.5667	9.4268	3.75923	8.56573	98.8566	89.7734	82.1255	66.9229	42.8469	64.2617	41.421	49.8906	22.832	24.2434	24.8464	49.1952	7.83812
37.6	8.81402	4.17969	8.59336	98.6928	89.4639	80.6868	66.507	42.7973	62.9789	43.177	50.8735	20.9768	22.9372	32.3528	43.1329	6.66041
37.6333	9.3913	4.15306	10.1292	96.3101	88.8572	79.8451	69.3936	44.3704	63.6642	42.034	50.7022	18.0807	25.8347	32.2523	42.4623	7.5783
37.6667	10.4191	3.53619	7.76635	98.1265	90.2226	79.7549	66.4441	43.7412	64.3586	42.757	51.5553	21.0681	21.4859	30.6034	43.564	7.21279
37.7	8.35069	4.0644	11.6102	99.2317	91.1043	81.1128	68.1001	43.6071	63.0125	46.24	50.5942	17.7317	25.9936	27.7671	45.0621	8.36144
37.7333	9.50201	3.71628	10.2349	95.4221	91.6269	81.1263	67.789	42.1465	60.2574	44.19	52.0619	19.2234	21.7487	44.1002	41.301	7.37562
37.7667	10.1215	2.65032	8.77906	97.9116	91.3857	79.7349	67.5129	42.1754	62.9583	42.994	50.2569	20.3959	20.5081	27.0359	43.4132	7.90666
37.8	9.17624	4.45396	9.7063	95.5826	91.0883	81.9069	66.8714	44.7564	63.7242	42.547	50.305	19.288	13.0451	29.6225	46.9406	5.57429
37.8333	8.84529	2.80555	9.39927	90.6785	91.8735	84.0331	66.813	43.009	63.8266	30.7	49.301	23.5181	16.6988	33.0896	38.446	7.50363
37.8667	9.86442	4.30477	9.43474	95.9437	89.7682	83.4487	66.6119	43.3888	63.2536	28.699	51.5408	21.8089	20.902	26.0287	48.2635	8.63401
37.9	9.14132	3.64093	10.2291	98.3298	88.7331	85.4278	68.3819	42.2623	61.6785	38.862	52.0876	20.2542	25.8558	38.2796	44.7268	9.40905
37.9333	9.0475	4.59361	8.02522	95.3241	90.2558	82.8557	67.1188	42.9508	62.9453	42.939	50.9123	17.2126	24.7601	32.8248	42.9943	9.26989
37.9667	8.8238	3.32923	9.28822	99.2731	90.9815	80.7959	67.7199	41.4778	63.436	44.27	50.5032	17.8911	22.7372	33.1057	39.6177	8.5846
38	8.47846	3.28628	8.28092	97.6563	89.6243	81.5536	67.2931	41.9833	64.3359	44.926	50.6508	18.6273	26.8403	26.8133	42.6241	8.8145
38.0333	10.8317	3.73863	7.5896	94.9605	87.2063	82.6457	67.8786	43.6181	62.0351	44.451	51.9104	17.339	29.3256	32.8829	44.4061	8.89824
38.0667	7.84055	4.07193	9.49894	92.9423	88.625	82.3048	67.7017	42.5045	63.2925	44.798	51.4677	13.7771	24.4951	34.94	40.7076	9.38821
38.1	8.84548	5.04847	9.31697	98.002	88.693	82.0204	66.5868	41.1424	62.5085	43.395	50.6897	15.8923	21.0237	34.9718	39.365	7.90494
38.1333	10.0532	3.3433	8.05023	95.9901	88.3267	82.9784	67.5105	41.815	63.0616	44.455	50.1225	15.4688	28.1004	29.893	41.7728	8.02878
38.1667	9.36214	2.3773	8.69508	94.0459	87.6866	83.1051	66.8179	41.5626	62.6034	44.47	49.2233	19.2133	23.9728	30.1898	41.0737	7.55255
38.2	9.07475	4.82468	8.02653	95.3675	88.5225	79.8496	65.989	41.5646	61.9286	43.012	49.6324	23.1016	23.1772	30.4286	37.9112	7.26159
38.2333	7.88928	2.91179	10.699	95.6879	89.6844	80.2891	68.611	42.5124	62.7967	43.188	49.749	19.2302	27.1715	27.6032	39.1502	9.11233
38.2667	8.66533	2.93364	9.00434	92.8385	88.0332	80.1136	67.0256	42.2789	62.4025	41.66	50.6877	20.4338	25.2957	31.8224	41.3576	8.33691
38.3	9.26065	2.04325	10.009	96.65	89.495	82.429	66.2971	42.171	63.5893	42.493	50.9242	20.157	20.4358	36.2808	40.2362	8.8389
38.3333	8.55578	2.7646	10.7922	95.7484	89.5421	81.5537	67.729	43.7099	61.5772	44.482	50.1172	16.9294	22.6583	24.5123	43.7648	8.02302
38.3667	8.04794	1.92068	11.1768	98.4281	88.2111	78.7427	66.2194	41.9727	64.3373	44.308	50.3498	19.2321	25.4907	24.7511	38.8589	9.75985
38.4	9.86825	1.93249	9.23522	95.681	88.6559	78.791	67.6213	38.621	62.2199	41.843	50.3761	22.3553	23.2089	27.0673	47.7442	7.3652
38.4333	8.34225	1.3872	10.9697	92.2897	87.2456	81.0466	67.255	44.5354	63.9683	41.454	48.6686	20.8259	31.2757	33.2011	40.3818	9.26412
38.4667	9.04347	3.22901	9.14694	97.0191	87.7542	78.7852	65.944	43.9183	62.0581	45.254	50.3814	18.566	25.8558	35.3482	41.635	8.7657
38.5	9.9872	2.29894	9.43268	95.1816	88.6397	80.6111	66.7776	42.5695	63.5505	43.335	49.6106	17.852	26.5586	28.6578	49.2935	9.38061
38.5333	9.43658	3.80067	8.32963	96.2413	88.0815	79.1532	66.0389	45.1038	62.5061	42.617	50.2957	14.8015	28.0238	27.2901	48.3314	10.1338
38.5667	9.62479	2.62244	10.2005	97.822	90.6243	81.1291	67.3797	41.7638	63.6854	41.21	48.2332	14.1018	21.7421	34.1445	46.9957	10.0406
38.6	9.21173	3.63063	10.9682	95.8892	89.3271	80.2615	66.9758	42.9029	62.8729	44.735	50.0961	17.9519	26.4547	32.077	44.5554	8.31632
38.6333	8.53928	3.60903	10.0925	96.2934	91.862	80.3243	65.9183	45.2089	64.5765	43.874	51.6198	18.9387	28.0593	32.6552	42.5583	7.71232
38.6667	8.64231	3.08761	8.38208	95.6521	88.5633	82.0614	66.707	43.7253	64.9549	41.483	49.1884	23.6038	28.8405	41.9003	49.6598	7.58713
38.7	7.54951	2.56317	10.8806	94.5919	90.2163	81.0069	68.1176	44.013	63.5953	43.192	50.6455	24.173	25.558	32.6818	50.811	9.62743
38.7333	9.61616	0.793942	10.6253	99.216	90.416	81.9473	67.8184	44.1992	63.4457	43.265	49.2826	20.7446	24.2001	26.2723	45.3059	8.52635
38.7667	7.98463	2.47124	9.74027	97.256	90.6957	80.6269	65.9054	39.6494	64.6557	42.359	49.7114	17.4191	25.6413	30.6938	39.9804	8.49288
38.8	7.42384	2.51821	9.7427	97.6884	88.5166	80.1417	65.9223	41.894	65.5067	42.43	50.1633	20.7126	29.8295	18.1246	39.0067	8.01444
38.8333	9.00836	1.24303	9.93531	92.2773	90.8829	84.9637	67.1142	44.2686	64.8233	44.046	49.2101	20.8383	24.6729	38.55	35.8675	10.2255
38.8667	8.89613	1.68207	9.24026	94.4438	90.4077	78.8991	67.432	42.504	63.5455	44.274	50.8346	20.0626	27.2181	35.7616	40.5497	10.0758
38.9	8.96501	2.9683	10.5299	96.2013	91.9005	82.2327	66.85	42.2815	65.0326	44.925	52.1054	22.9784	30.1984	33.339	34.8709	9.26633
38.9333	9.10851	2.70181	12.0418	96.3278	89.3097	83.6255	67.5137	43.0635	63.3265	44.103	49.0013	28.9261	34.051	30.9747	40.1905	10.4526
38.9667	9.08607	1.71899	9.97693	97.1947	86.8508	83.7333	66.4368	42.6994	64.272	42.186	46.6073	23.1951	22.1393	36.6203	44.8933	7.37378
39	8.95829	0.533732	6.96845	96.8796	90.4112	81.702	67.745	42.7825	63.8817	43.703	49.5527	22.8412	32.6509	18.1775	42.6549	8.90352
39.0333	9.61961	1.79259	9.76808	96.0913	89.5853	82.2505	66.6974	42.9058	63.2105	42.412	50.3162	25.8507	26.5286	25.5729	39.9166	8.36941
39.0667	7.7427	2.9349	9.78058	90.1653	89.7072	78.3714	66.591	43.6765	62.9853	42.171	50.3689	26.9104	32.6337	25.4615	41.8144	9.25395
39.1	8.35894	3.70724	9.30689	91.7221	86.5503	82.4191	66.9404	42.8195	63.8125	44.473	50.4459	26.4007	30.9857	34.5633	46.6891	9.08118
39.1333	9.11734	2.76184	10.7961	96.2685	87.3509	80.2302	66.7188	44.7069	62.4613	41.734	49.1442	27.5047	19.2285	30.0998	40.2928	8.19162
39.1667	9.12098	1.8398	10.859	93.423	90.6868	77.5444	67.1939	42.1349	63.7665	44.58	51.6673	27.8581	28.3966	30.7891	38.5556	9.46337
39.2	8.7532	2.54559	8.6165	96.7055	89.1104	79.8734	68.3047	43.135	60.9392	45.881	49.857	22.1516	30.7301	30.54	39.7161	10.3685
39.2333	8.42494	2.37806	10.1016	95.5347	89.8556	81.3605	66.9047	41.4731	61.3139	42.861	53.027	26.2095	29.5528	36.8059	40.6792	8.48086
39.2667	9.44176	1.01547	9.11782	93.4924	87.5113	81.083	65.8251	42.7527	62.8331	44.189	49.6442	24.5813	27.2281	27.3961	40.8127	8.21197
39.3	10.1856	1.77802	9.78842	96.483	89.0339	81.3809	67.0828	42.7832	62.2726	41.504	52.1449	18.9678	27.1448	39.1858	45.8526	9.4131
39.3333	10.0922	2.81308	8.43117	97.7229	87.3741	80.332	66.7603	43.5637	61.5639	43.119	51.328	19.4964	29.9001	34.9664	43.6171	9.81172
39.3667	8.7507	1.91038	9.75688	90.2745	89.7203	83.9259	66.9436	42.3391	63.0404	42.233	50.718	18.7971	28.3988	32.8036	41.0155	9.07775
39.4	9.71074	2.35972	11.0191	92.0444	89.4228	84.6995	67.8911	40.7904	63.4816	42.436	51.1054	17.0921	25.9613	22.3391	46.5613	7.98097
39.4333	9.34737	1.40554	8.4278	93.8773	90.0857	85.741	66.0288	41.3259	63.0217	44.22	49.3853	18.6642	29.5467	28.9122	48.8369	8.40141
39.4667	8.44144	1.71347	8.56499	96.826	88.7178	84.0129	68.4179	41.8038	62.4401	42.972	51.4795	25.1267	24.3251	26.8925	42.2983	7.60687
39.5	8.69929	3.88381	10.8547	94.9591	85.8638	87.29	65.3152	41.4425	63.602	42.221	48.5	19.5052	31.5608	27.7673	48.2265	9.37546
39.5333	9.74739	4.24775	9.0999	94.7785	86.8812	83.4984	65.7141	43.7215	63.191	42.673	49.2536	17.8415	25.114	29.8824	48.7605	8.51998
39.5667	10.1547	3.82504	10.3556	95.6542	88.7036	81.3785	67.3519	42.913	61.9907	41.961	49.83	15.4103	21.8387	33.1957	50.7132	7.56776
39.6	10.1553	2.83543	9.38696	96.1087	89.9462	83.6672	67.5337	40.5497	62.0972	45.702	51.0388	20.0909	28.4994	32.427	40.7168	9.16285
39.6333	9.83737	2.55588	9.27254	96.4969	89.6477	80.9023	70.3829	43.64	62.2233	43.423	51.687	20.216	25.9663	30.8844	44.4117	7.53465
39.6667	8.64231	2.39087	10.6897	95.7547	88.1574	82.9111	67.974	41.5999	64.0735	43.158	50.3517	19.6561	25.4124	39.1756	43.9904	8.32919
39.7	10.6633	2.62169	11.5643	96.8228	88.9196	83.753	69.1427	43.7276	64.1207	45.114	50.8715	15.0584	25.2668	34.33	34.2804	9.32568
39.7333	10.1507	2.51695	9.59525	94.0217	89.8023	86.1207	69.1351	42.3191	64.9744	43.077	51.6679	15.1079	26.093	31.3034	40.3121	9.51781
39.7667	9.21039	3.34556	11.6436	94.37	89.3817	84.0453	68.1546	41.0796	62.1117	43.347	49.9354	20.6893	27.6043	22.0368	37.2247	7.96171
39.8	9.11887	2.86206	9.40917	94.7941	89.4201	81.8878	68.0634	41.3043	63.6839	43.307	52.2977	19.5332	30.824	36.403	45.2917	9.60597
39.8333	9.4974	2.01286	10.219	92.7934	88.1325	85.0666	68.255	42.0498	62.5125	43.077	50.9617	19.5903	19.5874	33.1798	38.2939	7.03083
39.8667	9.43697	1.94404	8.05452	92.9323	87.8216	84.6573	68.9858	41.338	65.2978	45.472	49.0724	16.0444	27.4187	34.5473	41.549	8.16685
39.9	10.3778	2.7646	9.58218	93.7584	88.0637	84.585	67.147	42.0284	63.0843	42.864	49.633	19.0059	25.0891	33.286	36.906	7.90078
39.9333	11.2264	2.16632	10.9587	93.2372	89.1849	83.2535	69.8888	40.9175	63.9333	43.55	50.6772	17.5443	25.0824	30.1583	41.3161	7.82206
39.9667	8.98151	2.24318	9.54859	96.1539	91.1366	84.3686	68.8342	43.0432	62.6488	42.983	47.2885	20.7892	25.593	32.6498	35.914	8.48969
40	10.2817	1.14759	9.38714	91.8456	89.7466	82.9511	67.3423	41.9956	64.9607	42.74	50.5441	19.9006	31.0068	34.2344	43.1112	8.35334
40.0333	10.1322	0.569398	8.47391	95.5919	87.754	84.6453	67.3739	40.8388	63.5956	44.029	50.0368	19.7247	25.8875	32.3632	44.0663	8.23797
40.0667	9.17777	1.0966	9.50977	95.1264	87.2099	85.3541	69.6739	40.4361	63.4857	44.938	49.8056	20.9668	29.2072	32.1939	42.7959	9.59641
40.1	9.44541	3.35761	7.25252	95.7699	87.5174	84.8039	68.3657	40.6618	62.8188	43.103	50.3036	18.3216	28.3216	37.5481	45.4913	7.44453
40.1333	8.90764	2.2683	9.8349	95.729	87.4228	81.9048	66.8516	40.8816	62.7918	41.194	49.7009	18.034	26.1553	45.4252	39.6337	7.91365
40.1667	9.56973	2.97006	8.06927	92.1806	88.0774	82.5438	67.0978	41.7751	62.9719	46.586	51.0283	16.1787	27.6171	29.0076	29.9822	8.48344
40.2	10.1929	3.03863	8.93566	94.1079	88.9011	85.3017	68.6845	41.7571	63.9889	43.448	49.7536	21.0536	22.2754	21.3263	29.2355	8.62751
40.2333	10.3041	1.63661	9.57323	92.2217	86.0781	85.539	68.2934	41.7122	63.8887	41.756	52.7193	19.6739	34.8578	32.4482	25.4665	8.48687
40.2667	8.70236	0.867283	9.78786	94.3072	87.4128	82.4487	67.6875	40.7485	64.1252	44.621	50.8287	20.6139	30.0284	31.282	28.1054	9.35756
40.3	9.26545	4.80032	7.29078	94.1451	88.7087	83.9978	67.1984	41.6297	62.6998	42.374	49.4532	16.2716	32.3659	27.6138	28.9779	8.77673
40.3333	8.46465	3.26845	10.8536	91.6147	87.4916	83.7472	66.8299	42.2819	62.9114	43.864	50.5724	16.4605	26.9881	34.9927	33.749	8.30369
40.3667	10.812	1.74888	9.70201	91.2915	87.009	84.6265	65.6842	42.8019	60.7141	42.532	48.9031	18.1264	21.582	34.1763	30.0737	7.47015
40.4	8.79905	1.34726	11.7735	93.7316	87.5475	86.125	66.5811	42.7531	63.9553	41.89	48.6139	20.1615	24.2273	25.7475	34.3496	8.16881
40.4333	7.80678	2.39664	10.4469	92.9394	88.8127	82.7223	67.2544	43.89	63.8304	42.355	51.0652	20.3322	29.0022	34.8178	30.744	8.79046
40.4667	10.5115	1.57583	8.01122	94.0011	88.8517	84.8216	67.5843	39.8173	63.3105	43.16	50.6949	18.8021	19.7874	28.2972	33.7159	7.95338
40.5	9.52695	0.678153	10.3971	91.3882	86.7731	84.0115	67.1715	43.1916	64.062	43.486	49.4479	19.7621	29.175	32.9519	32.1239	10.1821
40.5333	7.69589	3.40207	10.0245	97.2637	87.8234	84.2887	66.9272	41.7591	65.0474	43.288	50.9479	14.4509	23.7134	34.6748	36.6385	7.62759
40.5667	8.91014	2.41423	9.74624	95.8783	85.6823	81.7315	66.5574	42.8749	63.6841	44.838	51.8181	21.3781	28.7155	26.6116	34.0759	9.83538
40.6	9.56743	4.57904	9.51126	92.7251	88.755	86.5306	66.0023	42.5126	62.8992	44.525	50.1548	15.2923	30.344	31.2924	32.2811	7.13468
40.6333	9.79938	3.87226	9.85188	94.4944	90.2171	86.9361	65.9157	41.6728	62.0317	43.934	51.3392	15.4071	31.1735	36.4292	32.7416	9.62191
40.6667	7.84439	3.16899	9.62866	92.856	90.6997	85.2671	64.8969	42.3704	63.4118	44.391	48.8412	19.3665	29.2889	32.8776	37.9343	9.63871
40.7	8.82495	2.59934	9.00509	96.016	89.4783	84.0463	64.8779	43.0781	62.8424	45.946	51.0533	17.2593	28.2193	27.9423	36.2751	8.15998
40.7333	10.4523	2.46697	9.62474	94.4243	88.8303	81.9665	66.6693	44.7392	63.5834	44.332	47.9169	16.6473	23.0972	37.2512	35.1616	9.24279
40.7667	9.04597	1.53112	10.5837	94.9475	88.6448	82.8434	66.9025	41.7521	64.4859	45.525	49.8432	26.1044	27.8265	29.2357	31.2718	8.30025
40.8	8.93393	4.43211	10.7162	93.3465	87.9896	85.286	66.6173	40.9703	62.6595	41.258	50.7971	19.6282	25.5196	38.1309	34.045	8.33189
40.8333	8.27932	3.7419	8.32627	94.9046	88.1492	81.7477	66.549	39.0592	64.6761	44.362	50.554	24.3822	27.0692	38.8731	31.2631	8.95538
40.8667	8.53295	-0.3971	8.97504	97.3322	90.4325	81.158	66.2271	43.5573	63.0172	44.751	50.9262	16.6148	26.7448	34.7965	29.9258	9.28619
40.9	11.1166	2.44713	10.9766	91.8017	89.1707	83.5942	65.0606	42.4577	62.8288	43.731	48.7806	18.0978	28.8705	34.6056	27.659	8.27978
40.9333	10.5123	4.08751	10.8164	97.0413	88.3084	84.4105	65.3295	42.1475	62.6993	43.976	50.9163	20.3419	31.0391	34.1925	33.1443	9.39667
40.9667	10.5303	2.93716	10.4598	94.2612	87.6228	84.3386	66.8009	41.1506	64.7474	42.434	51.2595	20.2564	22.3138	38.3433	29.2794	8.10579
41	8.62926	3.29633	10.9342	95.5861	87.2036	84.9899	65.574	41.465	64.3301	47.125	51.9044	16.4755	22.9833	31.1866	28.0865	7.02286
41.0333	9.58066	2.67569	9.49726	94.2017	86.8777	85.298	66.2633	43.177	63.8813	44.85	50.9822	25.4141	26.2992	38.0356	29.4295	9.42365
41.0667	9.0617	2.72869	11.0315	94.5532	88.4594	80.4368	66.7916	42.5655	61.2079	45.387	50.3669	20.0301	22.6649	39.785	30.4298	9.03251
41.1	10.7924	3.11624	9.79477	93.7887	90.2525	83.8921	66.5082	41.3445	63.7932	44.577	49.2674	20.6218	24.4356	36.6572	34.8071	8.17139
41.1333	9.13	1.23801	9.73635	95.0659	89.3191	82.2238	66.8663	41.2599	64.959	45.839	53.7779	15.5076	28.9528	33.1799	26.605	8.50306
41.1667	11.8248	2.31778	9.91123	92.9426	88.848	82.2334	65.736	41.9858	63.5087	45.435	49.5586	15.0594	23.7856	27.8574	40.0075	7.91917
41.2	10.184	2.64078	10.0744	97.2332	89.0011	82.3191	66.6236	41.8261	63.9872	43.417	51.3913	16.9972	27.936	29.0819	34.5518	8.82909
41.2333	9.82144	2.98036	7.41546	100.195	88.6217	84.1589	64.7651	40.896	64.7389	45.545	51.083	17.5426	27.017	27.0623	30.245	7.86129
41.2667	10.7226	2.05154	9.47449	95.9656	90.1948	85.3282	66.0101	39.8706	62.6166	44.033	50.5197	12.3117	27.092	30.842	35.2092	8.08445
41.3	11.3392	3.48897	9.84778	95.4527	89.9116	85.2391	65.3961	41.5097	64.8766	46.479	49.8306	11.7568	25.478	25.9808	33.7714	8.84147
41.3333	8.82591	3.02582	10.5031	97.0433	88.4061	82.8545	66.7898	42.4184	65.5724	44.38	52.1706	15.1662	31.7063	28.7107	34.1114	9.79762
41.3667	11.5633	3.64043	8.39458	92.5982	89.401	83.0975	65.9128	40.9169	65.5956	42.419	51.5922	14.6392	35.4889	32.5863	35.5397	9.66176
41.4	11.3394	4.73904	8.49257	98.86	90.1972	82.4471	67.2481	41.2347	64.6672	45.361	50.9486	13.25	28.6383	23.0176	30.9712	7.5035
41.4333	9.72762	2.83845	9.39349	99.2296	88.405	78.7076	65.8275	41.6885	64.5292	45.034	48.4104	14.1749	30.2445	37.3041	33.265	9.55423
41.4667	10.3122	1.96464	10.5404	96.2561	88.7658	82.2157	66.6776	42.323	63.7466	44.056	50.8735	13.3292	23.2989	34.8074	35.1397	6.79479
41.5	9.70844	2.50615	9.8209	97.62	89.7765	81.0491	68.1616	40.5665	64.5528	44.037	50.7259	13.2363	30.9313	33.9535	28.7875	9.12925
41.5333	11.3212	1.84759	9.74307	96.718	89.2503	81.4314	66.2162	41.933	61.6033	43.943	49.2845	15.3721	25.6591	26.336	31.2286	8.29645
41.5667	11.3106	2.07942	11.0886	97.1918	88.0873	79.1412	66.1407	42.4529	63.9578	44.255	51.164	15.6194	27.5293	27.5393	36.1032	9.07751
41.6	11.6746	2.92284	9.19266	95.5602	91.4648	82.7366	67.3382	42.4593	65.4406	45.832	50.11	14.9372	30.5968	23.0651	37.7426	9.04955
41.6333	9.9966	3.32747	9.48326	94.6907	90.9816	79.7916	67.1176	41.8521	63.9578	40.69	49.162	13.7491	30.7796	28.2867	40.2501	9.83391
41.6667	11.1575	3.16045	11.5604	98.0379	87.137	83.5346	67.3029	42.4949	62.7523	46.248	51.5151	16.2061	29.9934	35.4222	35.5261	9.21851
41.7	12.07	3.91295	9.99672	97.8079	88.4397	85.3465	66.2752	42.8404	63.5683	43.121	51.5395	17.1445	32.9215	34.7596	35.7322	9.4386
41.7333	9.99584	2.69604	10.5158	94.449	89.0641	86.0576	67.1401	42.3467	61.9935	46.168	49.716	15.0274	30.6768	28.5785	33.096	8.74363
41.7667	11.4837	1.68458	8.28801	92.404	88.1957	85.4132	65.9154	41.551	63.4379	42.967	48.8491	19.76	23.6156	40.3256	33.163	7.68608
41.8	10.2903	2.71839	9.97357	98.1206	88.1489	83.3947	66.3431	43.2464	63.0466	45.041	48.8445	16.3545	35.6467	29.294	38.2208	11.6631
41.8333	12.3934	1.54443	9.3752	96.0677	87.6908	82.3669	65.5661	41.4338	63.4837	41.445	49.9446	18.595	29.3433	44.1745	37.6244	8.46223
41.8667	9.82394	2.42829	11.3409	95.8531	89.5263	81.2359	65.7482	40.9284	62.354	42.844	50.5131	15.0297	30.2112	42.685	42.0045	10.7205
41.9	10.6666	1.79912	11.6601	95.9543	90.0036	80.6462	66.8809	40.2852	62.2503	44.617	50.55	14.491	27.1642	33.6252	38.4814	9.42438
41.9333	10.4979	0.362686	9.52862	95.5291	90.5492	79.6637	65.9043	40.4408	62.6679	43.873	50.469	17.2455	28.3438	34.4947	38.2965	7.99887
41.9667	10.3772	2.75958	9.65871	97.6348	88.0935	84.4059	66.3603	40.9597	62.1966	44.488	49.2681	19.8342	33.4437	30.3965	36.217	8.86906
42	9.27063	3.70523	10.5005	95.4262	88.9335	81.6449	65.9997	43.3437	63.6613	45.787	48.2852	16.7331	33.4198	33.9221	38.7423	9.73533
42.0333	10.1311	3.03913	9.36344	93.7507	88.4867	80.3085	66.8602	41.7739	64.2701	45.694	50.1844	15.1474	27.4265	34.8656	34.509	9.04182
42.0667	9.07168	4.42985	10.4766	97.6061	86.7248	84.7615	68.3949	41.6401	60.0991	43.526	50.1699	13.8459	30.9941	40.3043	43.413	8.73897
42.1	10.3446	3.99885	9.96032	94.0245	89.3723	81.7026	66.853	42.6084	61.9452	44.815	50.5105	18.1769	27.167	26.389	33.5682	7.69515
42.1333	8.70907	4.06741	10.6027	96.9706	88.0228	82.5926	65.6676	43.4499	61.8862	43.127	49.4275	19.6852	30.4879	34.6958	36.6882	8.33716
42.1667	10.1888	3.13407	10.1149	91.2214	88.3538	82.9728	67.575	40.4153	63.8995	42.614	50.4374	16.5136	34.6077	32.2045	39.6416	11.2
42.2	8.87368	2.05807	8.25684	93.038	88.7133	84.9561	67.3052	42.1557	61.8674	42.99	50.5158	10.9093	32.8015	30.2269	37.4857	9.5698
42.2333	10.1253	4.35651	8.57898	96.378	91.1556	84.6123	68.2473	40.3319	64.7835	42.86	50.5513	13.3835	28.2944	29.1139	35.8729	10.3211
42.2667	11.0374	4.06641	8.5913	97.0011	87.9663	80.2099	66.0118	41.4802	63.1445	43.632	50.0915	15.7964	25.9697	29.6014	34.6708	7.94982
42.3	11.6962	3.5063	8.3483	98.2658	89.1852	81.8282	66.6326	41.8255	63.0413	44.539	49.0329	20.3027	33.5093	29.4794	39.2082	9.23494
42.3333	9.70786	3.03737	10.6233	94.9038	85.1658	83.3473	67.8485	42.5177	63.3588	44.395	47.4525	17.4263	26.2097	31.8652	35.6075	8.11535
42.3667	11.5738	2.70935	11.8023	93.2492	87.6073	82.0649	66.5544	40.8444	62.1199	45.999	48.9229	18.7569	25.5674	30.2537	45.5844	9.0764
42.4	10.1296	3.12729	10.3163	95.7546	85.8303	81.6721	66.7265	41.5508	62.2272	44.108	51.2101	20.5649	30.6062	30.3912	36.0712	8.54095
42.4333	11.3156	2.06661	12.147	91.7519	86.9458	85.3473	67.2005	42.4729	62.6881	43.949	50.3326	24.0612	26.0286	36.8109	35.5527	8.10861
42.4667	11.3334	2.18566	11.75	94.9478	90.2972	83.3416	66.8491	43.234	63.7637	44.782	51.2094	21.5099	30.069	20.669	40.8032	9.22317
42.5	12.6371	3.43673	9.58144	89.57	88.533	84.9632	67.4893	45.5177	63.9626	44.044	49.1712	18.3895	23.7534	31.425	41.7965	6.45111
42.5333	9.14266	2.21405	12.2756	91.9643	89.2434	81.7599	66.2352	43.2761	65.1676	44.381	47.1245	23.6663	30.1434	33.954	42.932	9.75765
42.5667	8.99014	1.92596	11.5817	92.808	88.282	83.9088	67.0178	43.3977	64.0161	44.679	50.2635	21.6159	25.0218	33.4555	50.6063	8.52182
42.6	9.54114	2.97986	10.8683	96.993	86.9943	81.2965	66.9405	42.2392	65.2977	42.96	50.77	23.1847	28.2927	29.2307	41.4849	8.96139
42.6333	10.3295	0.993369	9.46068	96.2033	90.1415	81.6769	66.7332	41.9685	63.9558	45.926	49.5474	19.181	31.1718	24.2051	39.0503	9.48397
42.6667	11.4219	2.38635	11.5709	96.6635	87.6809	82.5358	66.3219	43.0027	63.1857	46.443	48.4756	20.2838	25.0779	33.4552	42.3062	9.06242
42.7	10.6965	2.14924	8.41306	95.8099	89.2477	81.7014	65.259	38.8715	64.2143	45.371	48.4716	19.6607	26.128	32.4376	38.7205	9.53547
42.7333	9.95516	2.87185	10.1847	96.1988	89.389	84.0939	67.8161	42.1286	62.4353	43.169	50.1693	15.8482	27.1837	37.9669	49.8958	8.11829
42.7667	10.2391	1.78103	8.50395	96.6285	87.2632	81.2409	67.692	40.2438	64.2005	44.748	51.6495	16.5129	28.3405	44.9749	39.1303	9.21545
42.8	10.8034	3.56458	9.78544	92.5583	87.0802	83.7302	66.1686	43.2707	65.019	46.675	49.7957	22.1284	25.833	32.2571	37.2484	6.38588
42.8333	10.4494	2.25247	9.72347	94.1938	87.1579	80.1559	66.7998	41.4659	62.947	44.099	51.2582	23.3187	32.5231	33.3708	42.1421	9.94954
42.8667	10.3203	3.37595	11.0822	91.4348	87.0508	80.6858	66.8016	42.7557	64.2546	42.827	51.6422	23.8359	28.6116	34.8919	41.4639	9.0249
42.9	10.2748	1.87246	10.8144	96.4471	89.4511	81.4055	66.7017	41.7226	63.3032	43.508	47.9736	19.9151	29.1355	34.9876	37.454	9.38502
42.9333	9.40589	1.1835	7.68665	94.5346	88.3362	82.6702	66.7858	42.0913	63.1906	44.947	51.9005	19.2151	27.3787	34.3141	35.7654	8.09463
42.9667	9.60465	1.14934	8.8037	93.4659	86.8686	86.1599	66.9628	40.9123	63.7107	44.424	50.5882	19.7189	28.9783	35.1782	38.9223	0.20072
43	10.58	3.08233	9.44164	96.704	87.6165	81.5036	67.5135	41.7674	63.5207	44.288	50.0322	22.3233	32.7809	36.3129	39.6241	10.6889
43.0333	10.1346	2.54785	10.414	96.0259	89.3881	85.0734	66.1773	40.4381	63.5879	45.008	50.3221	19.8982	33.1298	26.5109	35.106	10.2918
43.0667	10.5246	2.89622	9.94744	95.2014	88.9856	81.2492	66.5983	41.3096	62.9517	43.729	48.8339	18.9784	29.3239	29.8508	37.4066	8.73271
43.1	10.091	1.72929	9.44071	96.8186	86.6188	83.9895	66.9694	43.1161	64.1165	42.928	50.8405	20.4598	29.7928	35.401	38.8188	8.38179
43.1333	9.42622	1.25609	8.74323	97.1355	87.9911	83.4147	66.8063	42.0902	63.5027	45.197	47.6982	23.8529	26.8453	29.5803	44.3808	8.27978
43.1667	9.04654	1.44296	10.8779	94.9835	87.6565	84.6756	65.2482	40.8607	64.848	44.707	48.805	21.1835	26.5297	34.9342	39.8102	9.67844
43.2	11.048	1.6243	10.3812	93.3337	88.0208	84.3521	65.9455	42.0466	61.9327	42.565	50.0586	23.1988	25.9164	38.2373	40.6183	7.18765
43.2333	10.2719	3.4832	7.80368	95.257	91.691	83.938	66.8236	43.3629	62.7081	45.897	49.2437	19.5846	29.2633	21.019	40.0175	7.5425
43.2667	9.93387	2.99417	9.32424	93.1393	87.3759	81.7927	65.9168	42.2552	62.9521	44.965	51.0856	22.4415	22.3199	26.2831	43.538	8.36916
43.3	10.798	2.06686	10.6852	94.4211	88.822	84.0451	67.0327	40.341	61.5013	43.575	51.4558	22.4336	32.4114	37.2456	40.2352	9.17351
43.3333	10.4737	1.06093	9.96517	99.3566	89.0834	85.0623	66.2407	41.1868	62.4328	45.912	51.1824	23.6663	33.5099	31.775	43.0241	9.32543
43.3667	10.6401	1.47938	13.1814	94.0778	88.0785	83.5863	65.8199	40.5072	62.0546	44.742	49.276	26.1017	26.5442	36.4186	39.9387	7.17686
43.4	10.4235	1.98297	11.0736	95.5693	88.214	83.2788	66.5772	41.274	63.9066	43.161	49.3254	28.6575	23.8512	37.6485	43.3808	7.37635
43.4333	10.2447	1.94705	10.0408	97.8601	88.0886	87.5512	66.2486	43.2108	63.0678	43.798	48.7279	27.4813	25.3419	37.9563	45.6813	7.47065
43.4667	10.8492	2.50289	9.78245	96.0133	88.733	83.8888	66.7946	40.9049	62.1291	45.243	48.6179	26.5173	29.3161	32.968	41.1597	8.78213
43.5	8.78754	0.945145	12.3187	94.8969	88.5694	82.4642	65.1333	40.8193	62.2943	42.945	49.3972	32.2204	27.6026	34.2609	32.4022	9.94807
43.5333	10.9841	3.60275	9.22887	95.2151	87.9583	82.6306	65.1904	40.6316	62.0519	44.659	48.6376	32.8375	27.6682	33.7044	36.7951	9.02245
43.5667	11.231	3.01376	11.7515	93.3474	86.2534	84.0314	65.785	42.1066	61.3258	44.721	51.0704	30.2124	29.4811	41.3224	43.5306	9.13378
43.6	11.1986	1.52183	11.0046	94.1887	88.2835	84.109	64.5538	41.5884	61.5249	44.977	49.5289	33.1031	35.3267	29.1881	34.9413	11.4101
43.6333	9.87247	2.37982	8.69937	94.941	87.7544	85.3878	65.8545	41.7635	62.2461	43.935	48.3168	30.8258	25.793	40.5009	36.9541	9.3063
43.6667	9.08933	0.284824	12.3605	90.1733	87.8138	86.3164	64.7513	39.8453	61.7581	42.757	49.1007	28.3872	33.3382	29.4533	43.1766	10.1408
43.7	9.54824	1.71899	11.0714	93.1316	91.0917	86.0088	66.4783	40.8599	62.5205	43.387	49.5942	30.6907	30.5746	35.6818	37.8279	8.8454
43.7333	9.75736	1.94052	9.57043	95.7156	88.4209	83.4562	65.0289	42.2643	61.9246	43.673	48.3985	33.0508	22.8711	32.0613	38.9026	9.06573
43.7667	10.6288	2.08319	8.46513	93.6224	87.5783	83.3543	64.3226	39.1253	62.8145	45.137	50.5	33.1672	32.707	28.6423	39.5546	10.1894
43.8	10.3137	0.222284	9.98029	93.6982	88.8991	85.3638	65.3908	39.1544	62.5463	44.4	50.054	31.7548	27.4854	34.2877	40.7772	9.08339
43.8333	11.1005	1.20159	9.78656	94.1398	88.1747	85.7227	65.6068	43.0446	61.8244	43.454	49.1086	32.6443	27.5354	29.9935	48.3758	9.48753
43.8667	9.60868	1.84583	9.86401	94.6818	88.3579	84.3607	65.789	41.6371	63.9196	44.653	49.0046	35.9196	29.9501	29.6492	47.2624	9.75421
43.9	11.4862	2.60989	9.0413	94.5668	88.9481	84.8881	65.1658	41.4403	62.1253	46.549	50.1475	39.163	24.5284	18.6918	48.7557	7.6054
43.9333	9.46095	1.84659	8.643	90.4086	90.043	86.0488	64.5186	41.373	63.0671	43.739	50.6251	31.8072	26.5314	29.5696	36.5095	7.96049
43.9667	9.71726	0.967248	8.51534	94.1551	88.097	87.3903	65.3127	42.1042	61.6882	43.895	53.1469	34.3653	30.6451	39.5359	47.1855	7.49235
44	8.32997	0.723112	9.2033	96.1646	87.7661	82.5742	65.3333	41.7659	62.7452	43.726	50.7444	35.9325	26.842	28.748	47.8415	9.53412
44.0333	10.3953	1.82649	9.94744	94.8946	88.6305	80.2327	66.1414	41.1078	61.9646	44.887	50.8399	38.2989	22.1393	33.9857	41.9885	7.03389
44.0667	10.4716	2.28287	7.55171	94.6498	88.8755	80.5913	64.2797	42.624	63.195	45.698	49.7799	30.9583	31.7513	34.06	45.6712	9.63503
44.1	11.8104	2.30572	11.7526	93.592	88.85	84.4012	65.5859	41.2359	63.2922	42.891	51.7114	37.0303	23.9489	31.7323	42.268	8.07047
44.1333	10.2796	1.5698	9.56203	95.5235	89.725	83.2988	66.6811	42.4779	61.6481	44.948	50.1765	34.6287	27.9165	29.9568	35.0564	8.97929
44.1667	8.56077	1.75541	12.8699	96.1086	89.0902	85.1984	65.5308	41.1251	63.423	44.689	51.4611	33.6918	27.3432	30.9639	44.2984	9.98694
44.2	10.5271	3.37846	9.78245	92.7069	87.9654	86.4989	65.6434	41.8982	62.5917	43.489	48.7285	40.1979	20.7081	38.7671	40.5393	9.36908
44.2333	9.78326	0.564123	9.47841	93.2425	88.6925	84.4352	66.5234	41.5478	62.3089	40.307	47.5592	40.4554	20.5847	25.4559	38.4856	8.35126
44.2667	10.641	1.40428	7.38504	89.8851	87.647	81.139	65.8683	43.1285	63.5458	45.016	49.4413	42.2778	22.0465	25.3764	44.2429	6.87449
44.3	10.5282	1.99327	8.02802	96.5046	87.3603	82.9433	65.5452	41.6487	64.9263	41.767	49.1943	42.308	29.0594	28.1758	35.3387	10.5046
44.3333	11.556	3.16773	7.82962	95.7957	88.3376	81.6583	66.201	41.1808	63.2555	44.184	52.1119	37.5661	26.1169	30.9959	37.5692	8.86796
44.3667	11.7335	1.81117	9.65759	94.8501	87.1625	82.2862	66.7423	40.367	64.4318	44.893	47.9538	36.9633	33.5432	31.0011	39.0263	10.6733
44.4	10.2583	1.41935	11.5261	92.4304	87.1369	80.2665	67.0495	41.7395	62.7987	44.855	49.8682	35.5608	32.1581	28.9971	35.3235	11.2631
44.4333	9.22228	2.68499	10.9824	94.5606	88.2845	84.335	66.0028	41.3602	62.9773	40.778	49.7022	34.0366	34.0988	29.7872	47.5826	11.0211
44.4667	10.1583	1.93801	9.42242	94.5781	87.323	83.7737	66.0772	41.8123	62.4883	43.489	50.5072	32.683	31.8936	31.9815	44.3135	11.3081
44.5	10.3009	2.93414	9.5079	97.5349	86.985	84.4609	65.7691	42.5911	58.8637	44.691	49.6469	40.3189	30.0556	32.798	52.5638	8.92571
44.5333	11.2914	2.58728	10.6696	96.3268	87.8368	81.08	66.3303	42.0684	62.1408	44.178	47.3491	31.1325	24.8535	29.9246	49.8941	10.1266
44.5667	9.99296	0.570654	10.143	95.7169	88.8698	78.7	65.8477	43.4873	61.2698	43.525	50.139	30.3136	31.138	22.6834	36.4658	9.96106
44.6	10.4726	0.444567	11.538	95.2489	88.2096	81.3306	65.4195	41.0491	60.8327	43.711	50.0783	30.8452	26.2097	27.8152	39.8793	9.41984
44.6333	11.5491	1.39448	12.1416	93.365	87.9328	82.4221	64.773	43.2296	57.9138	42.938	51.1172	37.9	31.873	27.0991	38.5658	9.22673
44.6667	10.336	1.37389	10.3164	93.4417	87.473	82.075	66.6635	42.3113	61.836	42.536	51.5131	36.3688	22.8311	24.3903	41.1734	6.70063
44.7	8.76471	3.03863	11.0344	93.4675	88.1037	81.2813	66.073	41.5439	63.4521	44.938	48.6778	36.8207	30.5379	29.6228	48.9818	9.40121
44.7333	9.02793	2.00733	9.42727	94.0614	87.2666	77.8999	65.9868	42.1166	60.2638	42.924	50.4822	34.828	27.4265	31.4727	48.1869	8.90523
44.7667	11.9054	1.42613	8.92894	99.2401	85.752	82.0571	65.5621	40.4685	61.8785	42.434	52.6679	24.3939	25.2502	29.8451	56.4666	8.99916
44.8	9.38037	1.43166	9.80111	96.0248	85.5846	81.4961	66.2283	44.1205	61.7515	41.981	49.7819	28.9091	22.9833	31.2288	46.6437	8.24311
44.8333	11.2366	3.00774	11.7997	94.4511	86.0054	82.8262	65.7413	40.9901	61.3742	43.274	49.0428	32.3291	27.3659	33.4183	41.5159	8.94386
44.8667	10.1133	1.53413	11.927	92.6063	85.8103	79.0437	65.8216	40.7621	61.817	44.183	50.6304	27.7427	24.3912	31.266	40.7831	9.26792
44.9	9.36809	-0.06204	10.5865	93.7236	86.3733	80.3971	65.4144	41.1405	59.7113	43.61	51.9321	32.9493	29.4395	21.4482	42.939	9.71473
44.9333	11.3075	0.946903	8.0394	96.8705	86.545	82.5648	65.0418	40.7846	60.5665	44.603	50.9196	31.5546	30.6157	30.4552	45.5245	8.97169
44.9667	10.7473	2.83066	11.3988	93.7559	87.5671	82.5741	66.1941	40.6627	60.0433	43.872	49.0797	36.5229	31.3013	27.8256	43.6014	10.5544
45	10.7155	2.30447	10.808	92.5956	88.7222	83.9079	65.6429	41.619	59.7743	43.206	49.1383	29.992	33.9755	28.5627	47.3024	9.73079
45.0333	11.4507	0.007535	9.76957	95.9211	85.7532	83.4467	64.9791	41.5937	60.8666	43.397	50.3142	34.771	30.5057	30.5185	40.3024	11.056
45.0667	10.1392	2.44537	11.5606	89.7712	89.1111	83.7285	66.6696	38.6838	60.4104	42.345	53.357	32.102	27.7021	31.3985	44.1605	8.42091
45.1	9.93962	3.56458	9.09542	94.1531	88.3099	82.8001	65.422	43.9742	62.0303	45.24	49.1732	29.3396	26.0475	31.5789	52.0129	8.48822
45.1333	11.2024	0.841161	10.5708	99.6151	89.6028	81.777	63.2544	42.1236	61.299	43.676	48.4479	32.068	23.1916	34.5579	42.4469	8.45843
45.1667	11.6665	0.784146	10.1626	92.1475	88.0792	78.4508	66.9478	40.9146	59.1564	40.812	52.359	33.4954	27.9132	22.5139	47.3094	9.07849
45.2	13.1436	0.272266	10.8917	93.901	87.2545	80.9607	65.9277	41.2041	60.4668	43.647	51.8722	28.3895	30.2162	22.9966	50.1438	9.10117
45.2333	8.5153	2.52173	10.0477	88.1204	88.7478	81.4426	65.3797	40.3592	61.7638	45.725	51.7384	29.6863	28.9	26.0976	44.5196	10.1134
45.2667	10.9549	2.11709	10.2063	96.981	88.5177	82.6542	65.4034	41.6326	61.7518	43.657	51.7938	27.8334	30.0256	31.3299	47.7304	10.41
45.3	10.3749	1.69789	10.6615	94.1142	84.6429	80.8003	65.834	41.3319	62.4631	43.808	51.7397	28.1792	25.0329	21.3161	45.9084	7.45127
45.3333	10.2564	1.79485	9.50902	97.0883	87.0181	80.2976	65.983	40.944	61.4334	44.721	51.7773	33.8038	24.0289	27.4757	37.9718	8.35788
45.3667	12.8284	4.26006	10.5236	95.7202	88.6569	79.12	66.781	38.7528	58.7734	44.605	50.0289	24.8613	30.9746	23.3941	38.868	10.2766
45.4	9.81223	2.24494	10.2029	96.8382	85.7265	78.3678	65.0137	40.9036	61.9219	43.35	48.7588	25.6067	21.3148	26.9084	42.5496	6.96535
45.4333	10.6976	2.82865	9.00975	92.26	87.205	77.1171	64.864	40.0229	60.3256	45.156	49.1884	32.7566	25.7213	27.7671	40.1608	9.57225
45.4667	10.8864	2.06184	10.4495	93.6387	88.4351	76.0784	65.2273	39.9373	58.873	45.72	51.6824	31.9025	26.9881	31.1651	36.1823	8.94386
45.5	9.95401	2.73848	10.1281	97.7794	88.4692	77.5267	65.412	41.0939	58.7955	45.517	47.7891	33.9022	23.025	19.8105	45.5358	9.27896
45.5333	10.576	1.39021	10.4327	97.1146	89.2424	78.241	66.0563	42.9256	60.2142	44.772	50.6785	28.4993	27.0459	26.4102	37.5291	7.92469
45.5667	11.1199	3.2363	9.5275	97.1098	88.2775	79.7141	66.1657	40.2146	60.7209	45.518	51.5718	30.7656	29.1011	26.442	41.3186	9.22587
45.6	10.28	2.79424	9.66767	94.0626	88.6344	81.0858	66.4041	41.7724	61.2533	44.004	49.7793	34.1362	29.2678	27.9583	48.9495	8.47755
45.6333	11.1051	1.61225	11.524	95.9107	88.2583	78.9166	65.6957	37.3923	61.5401	42.926	53.1436	27.0415	23.9967	24.6024	42.9501	7.7068
45.6667	12.2127	1.67127	10.3935	96.7745	85.1346	82.0554	65.0723	39.8943	61.0493	43.418	49.2075	32.0073	24.4657	27.7145	44.0591	9.23335
45.7	11.5704	4.3756	11.1181	89.3076	86.4341	82.0658	66.6065	40.479	61.635	44.456	52.7575	28.3878	38.3564	23.007	53.1867	11.8882
45.7333	11.3302	2.70508	10.7814	94.5436	85.845	78.6321	64.739	41.6491	60.0749	43.552	51.7872	32.4812	25.4296	28.4775	47.7011	7.90127
45.7667	10.6364	2.1279	10.3276	94.272	86.7474	81.2203	63.1482	41.208	60.9237	43.794	49.6416	32.0552	31.8136	24.539	50.9978	8.49018
45.8	11.8374	1.64138	11.3917	99.0932	86.7376	82.9433	65.9977	42.6827	59.1087	43.505	52.6409	36.2146	31.9047	29.9463	52.3645	8.54977
45.8333	10.134	1.28422	12.2332	94.6897	86.6137	78.4717	65.8078	40.46	61.3531	44.142	49.7714	25.1861	26.0219	27.7727	49.6366	8.8042
45.8667	10.5044	1.58864	10.2711	93.574	86.2188	80.921	64.9994	40.4959	61.1642	42.664	50.3399	28.6324	31.263	20.5471	53.6466	9.27222
45.9	12.102	2.18265	10.4344	93.7228	88.0066	79.9627	65.6864	40.2132	60.2215	45.332	51.0289	33.6711	29.3161	30.6245	54.8057	8.47461
45.9333	9.20828	1.37766	10.2298	92.3193	86.5474	82.7164	65.8023	42.58	61.0511	44.348	49.469	29.7167	32.7442	23.7489	46.5935	8.9457
45.9667	11.754	2.93791	12.6306	97.1767	87.3826	78.7731	64.9536	41.2035	60.0985	42.421	51.1943	34.648	26.6514	29.257	54.5084	9.80816
46	11.3331	1.25006	10.6871	95.2245	87.6721	77.3604	66.9718	39.7173	61.1319	45.595	51.7957	29.6822	27.5421	28.1118	49.0184	9.21459
46.0333	9.77156	2.042	11.8075	96.7643	86.8913	81.2351	63.6107	41.4909	60.4533	46.917	49.6712	30.4497	30.7329	29.432	45.2474	8.72781
46.0667	13.224	1.72326	10.957	95.2542	87.3975	77.043	66.8166	41.6532	60.0099	43.194	52.3557	33.758	35.6678	25.3604	48.4651	12.3159
46.1	11.5809	1.15361	10.6082	95.8149	86.7784	76.2251	66.1291	41.1314	59.402	45.355	50.3801	32.8602	29.2083	31.8491	55.044	8.57197
46.1333	9.52215	1.63887	9.54672	94.4397	88.5477	76.7119	65.2016	42.6346	58.0176	45.154	50.6515	32.7991	33.5282	28.6369	51.5347	9.32028
46.1667	11.1117	2.35847	11.0962	94.0616	88.1175	75.8511	66.0892	42.834	61.8011	45.003	48.9479	28.743	29.7901	30.7995	46.4976	7.06847
46.2	10.1031	1.57909	9.15422	95.861	87.7901	76.3759	65.2594	42.158	59.236	42.273	49.5625	29.2294	28.2255	35.5231	46.4257	8.40055
46.2333	11.6561	2.00985	9.10513	94.1919	87.0429	77.6788	65.3794	41.2082	58.9714	46.005	48.9123	29.1166	30.6257	26.9245	49.4153	8.74375
46.2667	8.76778	1.77626	10.6455	98.6357	87.3987	78.4365	65.7066	41.1878	58.6954	43.682	48.4802	27.6301	27.4682	28.8697	50.3127	9.02221
46.3	11.1214	1.5585	10.3306	93.3246	88.9178	77.4172	65.3186	42.9945	58.6436	45.602	51.5447	25.8241	28.8744	23.0387	47.3712	8.5331
46.3333	11.0157	0.885618	12.7771	95.3721	87.7342	78.1097	66.2981	42.0021	59.1353	45.569	51.2345	31.2937	33.0898	29.2885	41.9903	9.41715
46.3667	10.4475	1.8594	10.4073	96.5825	87.7643	78.0821	66.7604	41.8934	60.396	46.248	52.4934	30.7811	31.708	27.1314	44.5173	8.19444
46.4	10.5804	2.41975	10.6572	94.1646	86.969	79.9306	66.685	41.009	61.1696	43.249	50.0665	30.1663	31.6452	28.7534	47.3107	8.27095
46.4333	9.81761	1.79485	10.9023	92.3197	87.098	81.5175	66.8781	42.9312	59.8956	46.699	49.8339	28.5158	30.6385	30.5185	49.7206	9.55644
46.4667	9.26161	2.51997	9.37632	95.0588	89.089	80.8675	66.1421	40.4526	61.7859	44.075	50.4301	26.3483	31.1974	23.1287	56.8304	8.32919
46.5	10.5238	3.1298	9.61111	97.8581	89.5308	78.3418	67.1929	42.057	60.7693	46.966	49.799	24.416	34.1371	30.7255	59.508	9.14654
46.5333	11.9919	1.98724	10.9284	95.7545	89.4173	81.7026	66.4544	40.966	61.812	46.31	50.5019	29.9017	32.1553	18.9093	51.3187	9.85341
46.5667	9.14209	3.6349	10.6087	91.1625	86.5423	79.8523	66.1514	40.2471	61.5572	45.35	50.3168	27.8991	28.496	22.1907	56.3334	9.0303
46.6	10.4935	2.259	8.51422	96.376	87.4298	80.9949	65.0491	42.4313	60.1071	43.336	51.0105	28.0107	30.2307	27.5396	50.7181	8.65436
46.6333	10.3393	2.5049	12.0914	94.5499	88.1455	83.1071	65.736	41.1942	61.1042	44.955	49.7964	26.513	29.42	24.91	49.4946	9.73533
46.6667	9.54747	2.01261	12.0255	91.5634	85.6785	75.4787	66.2973	42.4093	62.2715	46.636	51.3148	29.7349	31.8814	19.3494	41.2259	8.77722
46.7	11.5583	1.60145	11.195	96.9137	86.4223	75.7423	66.7575	41.2965	61.5894	45.593	51.5625	28.2797	27.9227	18.1722	44.5643	8.10812
46.7333	11.325	0.239363	10.7563	94.4363	87.4571	75.9001	65.4241	41.4856	62.2405	45.718	51.6396	28.0041	28.4738	34.6855	58.1052	8.00218
46.7667	9.85041	3.45255	11.0766	95.3625	86.1406	78.2566	65.3911	40.6841	60.5267	38.175	51.135	28.1017	27.3243	36.2756	53.625	7.42037
46.8	10.9125	-0.82911	10.5363	93.0446	86.8517	80.8875	66.8118	42.1959	61.5154	27.628	49.4123	33.0686	27.9693	22.3656	46.2818	7.34202
46.8333	8.13562	1.59115	12.7006	93.022	87.9797	78.5183	65.0799	42.3855	58.467	34.778	51.7239	36.2232	27.0581	25.3551	49.565	8.26555
46.8667	12.4694	2.81534	11.7379	96.2407	86.1004	79.181	65.3631	39.9084	61.1834	44.272	49.9578	34.9226	31.388	27.6082	51.0163	8.31877
46.9	10.2264	1.09409	11.6082	97.3385	86.8055	78.9168	66.2401	40.2689	59.7121	43.383	51.6324	32.0303	22.0643	29.1507	58.1772	8.47461
46.9333	13.0277	2.22585	9.63071	95.4526	86.7608	74.9645	63.9794	41.716	59.8789	46.556	50.5243	31.6504	25.1529	36.3497	56.1475	5.70708
46.9667	11.552	1.68333	9.83658	97.9659	88.0577	76.0279	66.792	39.1992	60.4594	44.594	52.9209	28.7508	29.6167	29.6228	48.9484	8.1232
47	11.9382	1.95685	9.85561	94.7966	87.4184	79.5178	65.0554	41.4632	60.8947	43.463	52.2733	28.4748	31.5191	29.1988	55.0273	8.84601
47.0333	12.2357	3.25765	13.1345	92.8765	88.375	80.7372	65.9788	40.3819	62.444	43.475	50.5	31.093	32.3292	29.0396	41.7266	9.75924
47.0667	10.7531	0.597529	9.55307	94.9502	89.3	80.5105	67.2705	40.9235	58.8685	44.579	51.3807	31.0243	28.3633	23.3941	50.9617	7.61496
47.1	11.3004	2.59456	13.3617	94.6945	83.5739	76.9404	67.0318	41.0375	59.5802	48.196	53.9235	31.8663	34.6127	25.2493	56.9508	10.7941
47.1333	11.8303	1.84759	10.9086	95.1657	85.7775	77.0499	65.7805	41.6141	60.1451	46.403	50.6218	29.6962	30.0173	31.3826	60.2127	8.50416
47.1667	12.3075	0.415181	10.3616	94.3602	87.2762	78.536	65.672	44.0006	60.3319	46.402	52.1719	27.3385	29.4439	34.3511	56.5872	7.92089
47.2	10.0041	2.34139	11.4533	93.7631	86.0076	78.397	66.5307	43.1927	60.613	46.287	52.2312	31.6764	30.8707	26.9194	61.7488	9.28546
47.2333	10.2963	2.26754	10.6347	96.8334	87.8051	78.919	65.766	43.9664	61.3451	45.838	52.1455	30.841	29.1267	24.7246	56.534	9.23555
47.2667	10.8047	1.00191	9.37277	95.6034	86.5666	80.8944	66.0898	42.4027	60.5185	45.152	54.0586	27.9215	28.2205	21.0506	57.8515	8.24679
47.3	13.3688	2.48003	11.4628	96.0828	89.0081	76.4575	67.0084	40.816	60.129	45.666	51.8768	25.7599	33.3348	22.9116	62.058	10.3998
47.3333	10.6184	0.7957	12.4145	93.8012	87.4273	77.7983	67.2438	42.2132	57.8462	45.155	51.9756	22.4221	39.796	28.2657	57.8403	10.1137
47.3667	11.7404	1.33571	12.7515	93.7376	85.503	79.0357	65.5907	40.1642	61.0802	46.158	52.0217	25.2937	27.6282	19.7523	46.5643	11.0041
47.4	10.8392	2.19646	11.4796	93.2077	86.1359	78.8194	66.5152	41.2314	59.8492	44.827	51.6706	28.0675	27.8476	33.1637	50.3376	9.41948
47.4333	11.6306	1.77751	10.5704	90.9989	86.0152	81.3585	67.5353	41.7918	60.0444	44.611	52.4808	27.8701	29.0122	26.4369	55.4244	7.53882
47.4667	10.652	3.27046	11.7148	94.9178	87.8014	81.6283	67.6607	42.3773	62.5149	45.334	41.8906	24.7999	26.3647	29.7551	50.2836	8.61415
47.5	10.7876	2.31426	9.63015	99.3522	88.0701	82.0977	66.953	41.1598	59.7912	44.527	37.3998	23.6334	27.9404	30.9005	62.2386	9.86763
47.5333	11.1957	3.03135	11.2222	97.5741	87.8553	80.2676	66.1563	42.9761	59.9047	44.471	44.139	27.5071	35.5489	27.1261	50.8255	10.4805
47.5667	10.0829	3.49852	12.024	96.8195	89.0131	78.7279	65.2806	41.0714	60.7635	45.76	51.6251	27.7147	34.6205	30.8103	54.2514	11.332
47.6	10.0599	3.59673	12.6127	94.7228	89.6142	78.3072	66.3008	41.1875	60.0791	45.01	52.2042	28.0516	32.0653	28.2602	53.2958	8.81021
47.6333	10.7663	4.18396	11.6586	94.0871	89.3453	80.7551	66.5229	42.2307	59.2188	44.985	49.5223	28.0746	29.095	28.7642	47.9593	11.0444
47.6667	10.99	1.84583	9.29476	92.1151	88.4314	81.5228	66.2591	41.1109	62.7338	43.362	50.6732	31.1294	29.2261	30.6403	58.7493	9.77236
47.7	11.4445	3.46335	11.5507	96.2972	87.5212	85.0152	66.0491	40.315	60.4883	42.879	51.4354	35.3009	37.0068	35.3371	50.4315	10.9323
47.7333	11.6537	2.12363	10.4583	96.298	87.3918	82.708	67.9263	42.2213	60.1531	45.851	49.8135	29.644	33.2709	36.4772	54.3396	10.3073
47.7667	10.4294	1.73557	9.42932	95.984	89.0791	82.6886	66.3431	41.3905	57.496	45.329	51.3142	31.0829	27.7838	24.6239	43.6256	9.48054
47.8	12.9598	3.12729	10.9835	96.4108	88.8303	85.2059	66.3791	40.9572	57.0087	43.045	53.0085	27.0948	30.2445	22.8053	45.809	10.2264
47.8333	11.5261	0.841664	11.6812	94.2303	87.1325	83.15	67.6681	38.6582	58.9948	44.184	53.2635	28.2993	36.2218	24.8253	50.8256	10.142
47.8667	10.1332	2.43005	10.1554	92.8052	88.0613	85.9933	66.197	42.5924	59.4346	45.461	49.083	30.9546	31.698	35.4328	34.1542	9.81479
47.9	10.5261	3.83458	11.1328	92.8902	86.1745	83.4447	66.5105	41.1883	59.6989	45.145	52.2127	34.5796	27.3387	32.5862	38.6645	9.22538
47.9333	9.18257	2.70985	10.8077	99.557	88.2034	81.6932	64.6782	42.0725	60.4592	43.766	53.5454	33.5688	28.5538	29.098	43.5017	9.53302
47.9667	11.7348	2.25423	10.5272	98.4296	88.455	84.2357	67.3069	43.5759	62.2161	44.129	50.4986	32.3027	27.9499	35.6076	36.8041	8.28333
48	11.2525	2.90702	10.8123	99.5328	88.447	84.3747	65.6611	41.1527	59.6046	45.748	53.0342	33.9009	27.6665	39.2548	43.7891	7.83015
48.0333	12.0489	3.39529	9.83154	97.1787	88.8663	84.9439	67.1509	40.8584	61.2185	46.521	51.4901	33.6858	27.5054	33.4715	43.2887	9.04244
48.0667	12.4652	3.2569	12.1522	97.5556	89.9857	82.8896	65.6185	41.7993	63.124	45.059	50.6027	29.3948	30.4479	36.6624	45.6932	9.99589
48.1	10.609	0.44507	9.59376	93.8613	88.6914	81.7484	65.9702	42.493	60.2373	44.541	52.2114	34.9321	30.214	33.9434	47.0751	10.6027
48.1333	11.0319	3.35334	10.8469	95.104	89.3034	82.1957	66.6437	41.9863	58.3029	44.784	50.8517	31.8593	24.5745	29.7976	51.7005	9.51647
48.1667	9.9473	2.14246	11.8357	95.6854	87.3004	82.9371	67.4686	41.7055	61.5023	43.833	50.8293	34.1145	27.5643	24.4064	42.487	9.55668
48.2	10.9137	2.00909	11.234	93.3617	86.8041	84.7525	66.1369	41.7762	60.6114	44.794	49.5368	31.6693	28.8916	31.9184	46.9874	10.7415
48.2333	10.689	2.09951	10.4197	95.5815	88.0663	85.6903	66.9056	40.7948	61.1688	43.683	51.8069	28.6006	34.4699	32.8137	47.5873	10.6505
48.2667	9.99872	2.58175	12.0095	96.9029	87.4173	82.2486	65.6941	41.6823	61.499	46.789	50.971	31.0123	27.0537	18.3528	61.1667	10.6792
48.3	12.5554	2.58251	11.5737	96.4847	88.716	82.5699	66.2182	42.5553	61.7243	44.988	53.9275	40.5102	29.8284	25.2172	40.7057	9.4901
48.3333	11.6183	1.7848	10.0525	93.4666	88.3192	83.716	66.0435	40.5551	60.8888	45.423	50.8537	16.7627	27.811	29.2148	56.6781	9.83171
48.3667	11.4716	2.38886	10.9788	94.4204	89.4911	84.0847	66.7982	42.0595	61.0649	44.137	52.0408	31.3712	32.6959	29.4847	50.4964	10.1987
48.4	12.8583	2.53278	13.2161	93.8806	86.9501	81.0842	66.3361	41.1834	61.5439	46.739	51.2108	38.2607	26.8903	33.3706	50.8699	10.2691
48.4333	10.755	2.65635	11.5438	91.1436	87.6532	82.426	66.2602	43.3097	62.6275	47.027	50.9512	36.8499	26.0286	36.4293	48.3589	9.59874
48.4667	11.3381	1.83177	11.639	92.8642	88.5006	82.1223	67.4748	40.3951	63.0402	45.251	49.9446	40.0521	24.069	21.4695	53.6966	9.79198
48.5	12.0748	1.40955	10.0326	92.2668	89.0747	79.5835	66.0883	42.6753	62.9929	45.848	52.4855	32.9715	25.0407	28.2444	43.5018	9.4142
48.5333	12.2762	2.99694	12.619	94.4817	88.037	79.2681	66.2386	42.0373	61.8593	47.014	51.1739	34.3844	24.2545	26.601	43.6389	10.0182
48.5667	11.1282	1.97945	12.5974	94.386	88.1886	80.9775	65.6993	39.0932	61.5538	45.108	53.8227	35.5765	27.3959	29.4691	48.3259	9.16959
48.6	10.5161	2.07515	11.3512	96.3496	87.8795	79.5977	66.1674	43.2704	62.0956	45.939	50.3491	31.4707	29.9512	25.1223	48.2037	9.61652
48.6333	12.1162	2.05832	13.3189	94.665	87.0478	80.1474	67.3365	41.3107	59.6708	45.272	51.633	37.2571	27.0164	30.6726	42.0885	7.61962
48.6667	9.8767	2.86934	9.70723	96.3824	87.551	81.7192	67.0138	40.7105	61.4611	44.667	51.749	35.2172	26.4931	28.3823	48.6477	9.44167
48.7	11.3336	2.90752	11.0664	98.7183	88.1935	81.1781	66.7351	40.6849	59.6274	46.304	51.0177	37.5163	31.7591	25.5305	45.1927	9.88884
48.7333	11.9702	4.43964	12.3187	92.4816	88.0503	84.2832	65.4043	41.3843	61.3162	42.76	49.9874	32.4575	36.5485	37.3466	39.9789	9.57569
48.7667	11.8133	4.43337	9.61242	94.1279	88.7023	84.1025	66.2363	42.9534	58.5281	45.036	47.5204	34.4736	30.9713	35.8302	50.4098	10.203
48.8	12.1841	0.724871	11.3204	97.5491	87.0535	82.4032	65.5341	41.3561	59.9415	46.328	50.7292	33.9297	28.2866	28.5679	49.2556	9.86248
48.8333	12.3092	0.90546	9.10774	94.9695	88.1939	81.2172	66.6893	39.307	58.8063	45.448	52.7707	35.989	31.628	29.1563	48.8194	8.58766
48.8667	12.027	2.78319	11.225	94.6118	88.7021	84.9616	67.2603	42.4381	57.5305	46.414	52.5309	34.3493	28.9094	26.0127	47.0977	10.6985
48.9	11.5468	1.42965	11.5815	94.206	88.8314	82.6899	67.5006	41.5252	58.0177	45.913	51.4664	41.1448	31.9336	29.368	41.7745	9.15144
48.9333	11.3879	3.23404	10.1023	96.8814	86.3577	82.4948	65.9376	40.8363	59.497	42.733	51.6884	37.7086	28.5283	22.1585	44.6933	9.38036
48.9667	9.7635	1.40428	12.6121	97.9332	88.7919	81.6519	67.0753	42.9216	59.0254	43.047	51.2259	37.0874	23.9695	32.9199	40.166	9.46251
49	11.0591	3.07254	11.4824	89.2099	88.7143	79.1755	67.753	40.3409	58.4011	44.375	51.5296	31.9498	30.9379	27.6718	32.8026	9.08315
49.0333	12.8151	2.67996	12.7148	91.2043	87.0536	81.3919	67.2451	40.831	60.3868	45.068	50.5876	34.25	23.9984	29.3522	39.5979	10.723
49.0667	11.9831	0.758276	10.1813	94.2251	87.9654	85.406	66.9583	40.0733	58.9013	43.968	51.6034	35.5385	27.9549	15.5324	35.7161	8.7641
49.1	12.9026	2.74024	11.8547	92.2533	87.8556	81.394	66.2892	40.8951	61.2388	43.87	51.2424	38.6201	27.9888	24.3586	40.6752	9.17915
49.1333	11.9552	2.39916	11.4559	92.3809	89.4453	80.2728	67.0084	41.1067	58.1579	46.864	52.471	40.9485	29.7195	27.3592	42.8951	8.47253
49.1667	11.7455	2.67167	8.8065	94.2018	88.6356	81.9069	65.0812	40.0709	58.5635	47.312	48.6673	37.1183	24.729	25.9916	43.5319	8.30418
49.2	10.6781	3.37093	10.7168	95.7216	88.1347	81.9413	66.8337	39.8192	58.3653	44.641	50.0487	37.6866	25.0668	31.5521	40.0074	8.15042
49.2333	13.7976	1.69789	11.6287	90.1789	88.5764	77.3552	67.6934	40.1009	59.5788	44.913	52.3761	40.82	26.9559	31.7855	56.3295	7.59534
49.2667	12.8416	0.986336	12.6952	93.4319	88.3369	81.9894	66.2716	41.3384	57.1112	46.14	52.214	39.3651	19.5774	30.1053	47.1718	7.47248
49.3	10.4018	1.72753	11.2368	94.8601	87.9947	82.6873	65.7436	42.2873	58.1556	46.8	52.0191	21.8073	21.4348	36.6997	44.7328	7.28574
49.3333	11.9809	1.881	12.8966	92.2841	88.1722	78.1664	65.6955	39.4848	58.459	46.129	50.9808	38.0744	23.7278	46.3744	44.3618	7.62085
49.3667	11.9416	2.57221	12.3798	91.544	85.2648	82.5123	65.53	39.313	60.2817	45.241	48.2773	35.951	26.1136	39.2017	35.6475	9.778
49.4	11.4255	0.577937	12.3689	96.3923	88.5946	83.0411	66.987	41.0865	59.7388	44.911	51.0797	35.6658	25.4958	37.5744	44.568	9.71032
49.4333	11.9907	2.14422	13.6318	96.5542	88.6918	82.4155	65.9472	41.4047	57.1462	44.73	50.9044	36.0552	25.4413	32.3896	40.5481	8.14086
49.4667	10.9804	2.41799	12.2816	95.2401	88.7449	82.2217	66.4421	41.047	58.0879	45.768	49.7595	34.4123	26.3092	27.1049	39.8831	8.43893
49.5	12.6672	1.1717	13.1431	94.0316	88.5145	84.4994	66.0907	41.4464	57.2709	46.256	52.4328	32.9117	30.5473	36.7475	36.8328	10.1792
49.5333	11.305	1.58864	10.7536	95.187	90.4487	85.5392	66.5727	40.2401	58.4878	46.114	52.11	35.3957	28.81	31.2238	42.9544	10.2079
49.5667	10.8231	2.42452	9.84199	96.7272	87.696	85.9049	66.4271	41.3858	58.7039	43.365	49.3662	39.3794	30.6657	30.6195	43.8577	7.77914
49.6	11.2661	3.08158	11.6528	92.8768	88.3472	80.83	65.5094	41.0866	59.6349	44.816	51.8287	35.5934	35.8323	40.3099	40.3575	9.38809
49.6333	11.5806	1.05666	10.9967	97.8202	87.9047	83.6432	66.2697	42.0045	59.2567	45.507	48.3451	40.4622	31.8808	41.0941	42.7622	9.32408
49.6667	12.5308	0.799216	10.5363	94.541	88.6646	83.5949	65.6996	44.1142	58.5068	44.532	49.2938	37.4488	32.8881	42.4569	39.8144	9.72895
49.7	11.6761	0.297132	12.1799	97.8897	90.4276	85.6879	65.0173	41.6901	60.0797	45.873	50.7075	40.9926	25.918	34.6379	38.6642	8.26506
49.7333	12.9792	2.25373	10.8374	90.377	88.9139	79.1381	67.1756	40.7089	59.4556	42.324	50.7055	40.9972	23.7923	35.8146	36.2413	6.57029
49.7667	12.0776	0.984327	11.3193	94.6899	88.2719	81.4943	65.8705	41.2848	60.0718	44.895	49.409	40.107	29.4439	38.8148	33.9209	9.2255
49.8	11.2366	1.4309	12.1274	94.0921	88.145	82.3534	65.2709	39.7161	61.2803	44.857	49.7351	46.0834	25.9019	27.9423	39.5452	7.00213
49.8333	11.636	2.02969	13.7673	94.2577	90.3699	80.0924	66.4495	40.804	59.1865	45.592	51.8241	41.541	20.0063	30.6035	35.3364	6.84568
49.8667	11.9915	2.44587	11.3159	94.0394	90.202	83.0714	65.207	41.6496	57.429	45.92	50.6956	42.1896	29.705	33.9218	34.1782	8.48405
49.9	11.8616	2.27056	11.1013	96.2683	88.8954	80.7581	66.3609	41.1117	59.5097	45.558	51.5164	34.7718	21.0153	25.1167	33.8936	6.62252
49.9333	11.8689	1.9134	9.3528	95.5932	87.8773	81.8647	66.0594	41.8245	61.1704	45.867	51.8386	35.713	20.5686	30.9959	34.3603	8.10248
49.9667	12.0017	1.9139	13.9039	93.6969	87.3123	81.0183	64.9803	41.2043	59.4034	44.122	50.1831	37.1482	32.3809	22.0262	30.2096	8.71935
50	12.3048	2.4406	13.0099	94.1905	86.7797	83.3176	65.6664	41.347	61.2032	45.701	50.0408	31.2842	26.2014	30.3386	26.0405	8.83326
50.0333	11.0549	2.89245	12.3256	91.7722	88.7017	85.2342	65.0584	40.2823	61.0644	44.199	51.7786	37.783	19.7858	38.0092	33.32	6.57102
50.0667	10.6865	2.19646	10.6272	93.8206	88.7834	83.5273	66.162	41.7486	60.4545	42.291	48.4057	41.6105	23.6467	29.0184	35.7374	7.59669
50.1	11.6465	2.11709	11.3676	96.171	86.4481	83.3223	65.8296	41.0512	60.3224	45.587	49.5065	36.6641	19.6141	32.3897	35.2099	7.57094
50.1333	11.7196	2.29241	9.98925	95.3041	85.36	84.7334	64.9591	42.0737	61.1493	44.73	49.0968	32.6661	28.3455	25.8324	39.7057	8.53972
50.1667	13.0615	3.30311	11.8243	95.0971	86.8073	81.3399	65.6083	41.7927	60.5312	44.457	51.9637	33.8656	27.9199	34.2981	38.2385	8.92644
50.2	12.0579	2.23188	11.0955	93.5132	88.7676	80.2055	66.7694	42.0433	59.3127	44.097	50.5217	32.1658	30.9363	35.0562	53.8978	8.27414
50.2333	12.1567	1.97644	10.4951	87.9216	87.81	83.7123	66.5231	41.4235	58.2877	47.714	51.2674	32.7579	32.1836	24.6876	43.2736	9.52284
50.2667	12.0604	2.84498	10.2003	93.026	89.459	84.252	64.9485	44.4163	58.5769	43.931	53.3379	34.2785	25.7547	23.6592	50.8189	9.48311
50.3	11.8775	2.36048	11.0908	91.3919	89.961	85.5265	64.9624	44.3623	60.8158	44.911	51.6785	38.0904	25.5546	29.0819	50.8025	7.22321
50.3333	10.8431	2.36525	11.1503	91.263	82.9079	84.1126	65.9435	42.5383	61.2441	45.032	50.7173	41.4363	26.5364	24.73	60.7708	9.45516
50.3667	11.5669	2.37077	11.9415	92.3793	86.2679	86.3205	66.2051	41.6628	62.5791	44.278	50.884	37.5472	26.218	25.1699	41.4383	8.31791
50.4	10.0271	1.96012	10.5934	89.1569	84.7979	81.3396	65.726	41.6299	60.0406	44.205	52.9934	36.9987	30.2512	24.205	46.2792	9.02515
50.4333	11.4683	2.52549	10.9071	92.867	87.3349	80.8319	66.2723	41.4513	58.8311	45.595	48.3471	42.1357	23.2122	26.4844	42.8244	7.26294
50.4667	11.1824	1.41458	11.0037	91.425	89.2356	82.1438	65.3859	40.766	58.0955	45.616	49.9301	42.4625	28.5205	25.9175	44.6485	10.6945
50.5	10.66	4.00211	11.334	90.8488	89.4752	82.1805	66.4627	39.6869	57.254	45.605	49.3445	45.382	26.7048	32.9519	48.3935	9.00443
50.5333	11.5324	2.09298	9.89014	91.0848	88.6258	83.6743	65.6004	41.4806	57.7643	45.643	51.2378	41.4875	22.0115	31.743	46.758	8.21565
50.5667	11.9148	1.33445	11.2054	91.3796	85.9011	81.5869	65.5128	40.6518	59.7396	47.843	52.3866	44.9791	22.9372	35.6339	51.865	8.9186
50.6	11.2389	3.00347	11.5664	91.4381	87.6268	82.6135	65.8004	41.0742	57.8505	46.906	52.1007	40.9615	27.7021	28.9073	45.0759	8.13007
50.6333	12.0199	2.06083	11.8758	91.9203	86.763	81.804	65.618	41.1251	58.7777	44.275	51.1534	43.3111	26.3281	30.773	45.225	8.08028
50.6667	11.6122	2.51319	12.2816	94.2423	89.4323	80.5568	66.0091	40.946	59.7708	45.962	51.4841	40.5901	27.9665	31.2874	40.7821	8.29118
50.7	12.7388	2.23163	14.4472	96.1309	90.5217	81.2354	66.9234	40.9352	58.3015	46.766	51.3939	37.3393	26.8787	25.2864	37.738	7.22959
50.7333	11.7668	1.70694	11.1834	91.0147	88.8336	82.1568	65.7711	40.4295	58.8071	45.739	52.0125	42.5438	27.5982	32.9093	41.0474	9.82128
50.7667	12.7111	1.21389	11.1748	92.6332	88.247	81.6058	64.8824	40.3589	55.7753	46.526	53.2358	42.282	29.6311	28.3927	53.6274	7.69785
50.8	11.4029	1.55272	11.9141	96.0743	86.6334	83.1274	65.9176	41.5642	59.9567	46.215	53.5671	40.1554	25.0252	32.4586	50.9817	8.68355
50.8333	11.5487	2.00683	10.5419	90.6761	85.7135	80.6131	65.6522	40.004	58.2532	43.035	50.0039	42.0748	30.5857	28.1647	40.1953	9.30152
50.8667	10.8147	2.26101	11.6037	92.4767	86.5076	82.6463	65.8031	41.6968	58.5604	45.622	50.2575	40.8407	27.1209	22.795	59.5327	8.11719
50.9	11.4944	2.44211	10.339	95.3012	88.2733	81.1783	66.5829	39.7357	59.7181	45.343	50.3241	37.2496	24.8979	30.5135	42.598	9.03349
50.9333	12.4589	2.76134	9.94613	91.0743	87.2208	79.9483	65.2142	39.1282	59.5837	45.725	48.2002	35.9577	25.0746	27.9264	41.9317	8.51054
50.9667	11.2369	2.26152	13.1362	92.3409	90.3834	82.3908	66.6512	40.606	60.245	47.523	49.1422	31.302	27.3259	29.4479	57.5993	7.90985
51	13.0868	0.935098	11.3295	92.5071	86.5188	82.8019	66.2837	41.9153	61.8575	45.024	49.7206	35.1652	26.3408	28.3506	40.8376	8.20045
51.0333	10.638	2.46848	11.195	89.7883	86.6866	83.1522	64.8046	41.4421	60.2267	44.497	48.3873	37.4113	32.0586	27.8628	39.5746	11.2035
51.0667	12.657	2.81283	10.4607	96.7644	85.9414	83.5851	66.4364	39.3229	61.3906	45.956	51.8201	40.6696	20.2819	28.6686	50.3778	8.71628
51.1	10.7468	1.49395	9.6882	92.4954	88.9423	78.6218	65.0388	41.2017	60.0568	45.506	50.6146	40.5209	25.3002	32.374	47.5674	9.42597
51.1333	11.8583	1.3558	12.4505	94.2007	87.0675	84.3362	65.2923	41.8132	58.491	47.344	51.8451	35.7475	29.0355	29.9992	49.4811	8.75957
51.1667	10.3989	1.97569	10.032	90.6604	84.8827	82.4118	65.6343	40.722	60.0999	44.349	51.4538	33.7357	29.5934	22.1853	50.5655	10.1826
51.2	11.3887	3.39353	11.9805	94.2388	86.0242	81.2377	65.5047	40.9912	59.6563	47.957	51.9848	37.8759	26.8259	26.5373	39.3631	8.30234
51.2333	11.2237	3.70975	12.1429	91.8846	86.3458	83.6362	65.8546	40.8957	59.819	45.544	50.1027	34.5464	31.9775	22.7152	44.0372	8.80113
51.2667	11.0677	1.06696	11.3351	92.8962	84.5003	80.8494	65.0074	40.1557	59.4871	48.139	50.5955	38.2867	22.6905	26.8075	46.3922	7.46586
51.3	11.4196	1.13729	12.1058	90.546	86.7417	80.4831	66.2926	40.3953	59.8706	43.659	50.8959	35.2409	25.1324	33.9007	45.5052	7.53097
51.3333	11.7062	2.16331	11.5542	90.8307	87.911	79.8795	66.3336	40.5912	60.4293	47.512	49.5019	31.2399	28.7894	29.8294	46.6764	8.67631
51.3667	12.2609	1.79485	12.4593	93.9731	86.8522	82.7385	66.5198	39.5642	59.6936	45.704	49.6811	34.9898	25.8158	23.8709	49.0118	7.59865
51.4	13.906	3.51911	10.9471	95.6726	85.6804	77.9068	67.3041	40.7164	59.3034	45.464	51.4275	28.772	26.1569	31.2764	48.1853	8.76288
51.4333	11.67	1.82725	12.3956	90.8663	87.6621	78.7378	65.8224	40.6479	60.8658	45.95	49.8965	38.3947	23.7411	26.4898	45.9015	7.97079
51.4667	10.5647	0.221279	11.5565	91.025	86.571	79.3163	65.7923	43.2844	59.4854	45.568	53.0566	35.0927	27.5132	27.6558	44.7068	7.74555
51.5	12.2419	2.04601	11.929	93.4319	87.1579	81.9236	66.4231	39.2597	60.7071	45.794	51.8465	39.358	24.2912	33.2802	40.6213	6.22108
51.5333	11.2126	2.16306	12.0634	91.3512	87.9956	79.8496	65.0101	39.4424	60.0659	46.948	51.6706	41.1687	26.5253	28.414	38.0297	7.29727
51.5667	12.5413	2.24996	12.3135	94.6333	89.4009	82.0575	66.0261	40.0075	60.1897	47.884	51.5856	37.2611	24.4551	26.6911	48.4427	8.02057
51.6	11.4156	1.22545	13.6067	94.0557	88.24	79.0626	66.8787	41.8044	59.8	45.061	51.6824	36.189	20.5881	31.2343	48.6561	7.55133
51.6333	12.2114	1.83327	12.6485	93.8047	87.1875	81.436	66.8044	39.5613	58.7645	45.999	51.2463	36.8496	32.3181	33.1852	45.9327	8.87568
51.6667	11.7001	3.37796	12.6823	87.4105	88.5594	81.7308	66.5823	40.7741	60.2617	46.898	53.0079	38.2784	25.4891	31.107	46.6159	7.75217
51.7	12.2758	1.35932	10.7703	90.0234	88.7819	82.8176	66.2678	41.8513	59.2469	46.318	51.6086	33.4243	27.0981	29.9303	51.6508	7.74506
51.7333	11.9109	1.64867	11.9057	92.5778	87.5664	78.4937	66.0966	40.2569	59.7972	34.846	50.7015	40.8107	22.8922	25.4346	41.864	7.5165
51.7667	13.5094	-0.76481	11.6976	88.6693	88.2597	85.9998	65.6913	41.9564	59.4184	28.739	49.9822	39.8686	26.3486	23.145	44.2012	7.45986
51.8	11.5366	-0.29989	13.4238	96.7688	87.849	81.4172	66.523	40.5343	59.5308	33.723	49.3339	43.3175	28.0477	33.4818	50.7585	7.34153
51.8333	13.059	2.65384	12.2885	92.649	84.4849	79.9199	65.5819	40.9448	61.1949	47.399	50.4927	38.9713	36.2184	34.8176	48.0423	6.77199
51.8667	11.872	1.99377	10.862	93.6413	86.2118	83.1235	65.9839	42.2666	61.2037	44.471	53.025	41.7525	28.3132	32.5915	45.8392	8.7939
51.9	11.5082	1.79786	8.60847	94.2491	87.5483	83.1235	66.3193	43.3451	61.0769	45.758	50.4288	27.3363	22.1443	28.4779	47.1425	6.32984
51.9333	12.2493	3.02481	13.4759	90.2763	85.8571	83.2225	66.1629	40.7761	61.4242	47.367	49.6067	39.5524	21.4281	31.7005	50.775	7.85185
51.9667	11.8881	1.41634	11.7541	93.1728	85.382	81.8024	66.2685	40.0539	60.7706	45.242	50.0415	40.6759	26.1425	36.5989	49.0392	7.92812
52	11.2168	1.74336	12.4141	93.5541	86.2039	82.5977	66.6744	41.7859	61.5189	43.892	51.2503	42.2056	21.8082	28.1758	46.3608	8.04534
52.0333	10.9745	1.82046	13.2667	94.3921	87.447	80.5968	65.6061	41.7552	61.0799	45.229	52.1831	42.757	24.7435	22.5405	49.7889	6.34296
52.0667	11.2782	1.94404	12.2963	93.2839	86.9846	82.0161	65.4578	41.8182	62.0073	45.494	49.6917	40.2064	29.7917	29.9569	51.933	8.70991
52.1	11.8954	1.14407	11.3051	93.062	87.3739	78.5607	65.0695	43.0631	61.5126	46.323	50.7654	41.9937	27.9499	29.8032	51.3551	7.23486
52.1333	12.1569	2.30698	12.4033	92.1416	86.6986	81.04	66.2736	42.529	61.7621	46.403	50.745	41.7355	23.4556	36.6946	62.9594	7.54201
52.1667	12.8051	1.07048	9.60477	91.8863	85.3021	80.2088	66.6648	41.021	60.5244		50.4565	45.3006	24.629	32.4323	51.9774	7.97594
52.2	12.3338	0.346863	9.50155	87.0255	85.6952	82.2995	64.728	43.1888	61.3019		50.5421	34.52	24.4551	31.4516	39.6327	7.53232
52.2333	11.6005	2.39263	12.2398	91.0231	87.6478	80.3692	66.8998	41.3935	61.2207		50.1185	37.8932	30.0317	32.581	52.0885	8.91676
52.2667	12.8157	1.33822	13.8229	89.4231	86.4005	79.2881	64.5865	41.5521	60.6658		49.7806	37.0918	24.2229	29.8136	43.8858	8.59232
52.3	12.0003	1.23851	10.1981	90.1297	87.6504	81.3284	64.7131	40.056	60.4715		48.9057	43.5915	29.1978	29.0819	50.6184	7.55991
52.3333	11.315	-0.09544	11.9682	88.1826	86.5504	84.7274	66.7069	42.0755	60.0427		50.7951	44.2055	23.8561	35.8832	51.2288	7.14523
52.3667	10.0212	2.09574	10.5329	92.2846	87.1869	81.3573	66.2143	42.492	60.8598		48.581	47.3833	25.6524	32.7716	51.2826	7.79986
52.4	13.2602	1.92721	10.843	91.4481	86.785	84.4453	66.5068	42.7555	62.5682		50.9848	43.843	25.7002	31.4093	51.3674	6.66617
52.4333	11.4002	2.53504	10.5915	92.8606	87.7718	79.3476	65.2104	41.6256	60.6095		49.3563	41.0922	23.6061	29.6917	44.6406	7.93474
52.4667	12.159	1.68509	12.2961	93.1845	86.4463	80.109	65.4318	41.6132	62.1847		49.8102	40.3898	24.0867	33.1853	50.3375	7.34852
52.5	12.5613	2.28814	12.276	90.713	87.197	78.9237	65.5957	41.2139	59.5102		48.6172	43.6822	22.9016	31.229	48.169	8.17347
52.5333	10.8154	2.02115	10.8008	91.7901	87.4566	76.2731	65.1985	41.9958	61.6904		49.1047	44.9207	17.6978	29.135	50.5837	6.48066
52.5667	11.5017	1.01045	10.8168	90.7782	88.5204	77.4175	65.2517	40.2148	62.0746		50.9729	46.2875	20.5081	34.5792	51.4393	6.44841
52.6	11.8137	-0.16225	10.6759	92.1431	90.2497	80.6839	65.7704	39.8887	61.5026		51.9776	42.6197	17.3839	32.337	56.0034	6.77787
52.6333	12.551	1.09283	13.592	91.3716	90.9179	79.5495	64.5944	40.8663	62.028		49.1416	46.9391	25.2091	32.342	55.739	8.1937
52.6667	11.7995	3.12679	9.13182	93.9259	84.2089	80.3248	65.0224	40.2732	60.3218		50.5691	47.0015	21.5693	37.389	52.0303	5.83742
52.7	12.5903	1.2046	10.8101	93.0055	88.4787	81.247	66.0402	40.069	62.8562		50.5658	44.3162	20.2586	27.1682	46.0195	5.86268
52.7333	12.1128	1.0966	10.4465	94.153	86.3036	79.1311	63.9147	41.7613	59.2958		51.4025	46.2078	24.4545	32.3208	54.7422	9.0536
52.7667	11.4311	1.34475	11.2659	93.1814	90.0963	77.9912	64.2822	42.2906	59.108		49.4861	47.8758	21.7026	31.3403	53.8512	5.98064
52.8	13.1574	-0.30668	11.8213	92.7161	86.7918	75.1313	65.5026	38.5236	60.0252		50.5303	38.1728	22.5844	30.4335	55.07	6.79259
52.8333	10.4571	0.331542	11.1927	92.457	87.3408	79.4776	66.2522	41.0008	60.0976		50.6613	52.8924	24.0534	29.9676	59.0476	7.66266
52.8667	11.2368	2.02542	11.4309	91.7894	84.351	81.0069	65.0703	38.6823	59.8		51.3834	53.1473	22.3205	33.5297	54.9534	4.45924
52.9	13.9613	0.366705	10.9381	90.9149	84.4637	82.4051	66.8257	39.9807	60.1076		49.9519	41.7023	20.5058	32.3631	52.8959	7.85455
52.9333	12.9786	1.6886	11.8198	95.4972	87.3135	82.1242	65.6405	37.5975	60.388		50.5467	41.3529	26.9064	32.3794	60.5496	7.2367
52.9667	12.3144	1.07073	9.56576	95.1616	87.3851	82.6072	65.9666	39.5126	58.6128		48.8504	47.8466	18.4195	36.0687	60.6379	6.5297
53	11.1988	1.54368	11.4736	91.9079	87.989	83.617	65.4084	41.4901	59.9057		49.5006	41.4465	17.2955	31.3402	58.4613	5.3851
53.0333	12.0339	1.25257	11.3217	93.528	87.5816	82.3219	67.1546	40.9532	58.4002		50.0158	44.1348	23.0377	32.1989	60.6068	7.46206
53.0667	12.6499	0.837143	10.9258	95.6517	87.2296	86.3945	65.759	39.6603	58.8594		47.606	42.6505	28.4527	31.8122	53.6084	7.46059
53.1	12.4757	2.3326	12.6218	90.3182	87.0538	79.2634	66.6729	41.0931	56.3458		48.4519	52.1368	21.062	27.1576	56.4377	6.56833
53.1333	13.0893	1.68207	11.4264	94.0748	86.4072	81.9498	66.7188	40.9303	56.4195		49.5671	46.8956	22.9561	27.3803	53.7526	7.44306
53.1667	10.8699	-0.09444	11.6052	93.3128	86.5164	81.3075	65.7671	40.3835	59.4735		51.0085	47.0605	20.1653	35.0194	49.9593	7.65628
53.2	11.8524	1.01547	13.1887	92.9819	86.99	80.8135	66.999	40.2672	59.7632		48.5474	47.2902	24.5395	33.4183	52.9226	7.87711
53.2333	11.9391	0.187371	11.1714	92.6709	88.8684	84.1182	68.0375	41.3701	59.9089		49.3353	46.4883	19.3441	30.487	49.3725	7.31603
53.2667	12.766	0.943638	12.178	92.0016	88.6695	83.2902	66.0403	40.0536	59.7952		52.332	54.9773	25.009	37.1929	56.2099	9.32703
53.3	12.0091	2.81534	10.9766	89.6603	87.727	83.6233	66.5871	40.7636	62.7556		50.9874	51.507	23.1077	30.9954	43.2878	6.20453
53.3333	13.0572	2.99066	12.5427	90.9923	89.9279	79.0947	66.3293	41.2552	59.9906		48.0764	46.687	23.4089	40.7231	52.6948	7.38751
53.3667	11.3827	1.0225	11.9656	90.1307	89.9993	79.9937	64.9925	41.1872	60.2405		51.0876	45.1903	26.3186	30.0307	55.5677	8.384
53.4	12.0784	2.54282	9.89089	95.7246	89.5359	80.3206	66.0073	41.5909	58.9601		48.2351	46.6394	24.4451	31.8812	53.0526	8.09156
