# Supplementary material for: Self-assembly of pericentriolar material in interphase cells lacking centrioles
Source: eLife. 2022 Jul 5;11:e77892. doi: 10.7554/eLife.77892 (PMC9307276; doi:10.7554/eLife.77892)
Supplement: Figure 2—figure supplement 3—source data 1. [file elife-77892-fig2-figsupp3-data1.xlsx]

## Sheet: Figure 2 – figure supplement 3D
Figure 2 – figure supplement 3D
Characterization of cell division in centrinone-treated AKAP450/CAMSAP2/p53 knockout cells
Mitosis duration, min
65
180
90
130
365
145
215
125
65
215
295
175
65
60
70
70
150
145
215
400
95
55
60
70
100
210
200
195
135
65
120
275
100
110
95
375
