# Supplementary material for: Self-assembly of pericentriolar material in interphase cells lacking centrioles
Source: eLife. 2022 Jul 5;11:e77892. doi: 10.7554/eLife.77892 (PMC9307276; doi:10.7554/eLife.77892)
Supplement: Figure 2—source data 1. [file elife-77892-fig2-data1.xlsx]

## Sheet: Figure 2J
Figure 2J
Quantification of the main PCM organization types for cells prepared as described in panel A-C, E-I.
		Centrin positive			No cluster			Dispersed cluster			Round cluster			Cylindrical cluster
no CB	440	386	467	0	0	0	0	0	0	0	0	0	0	0	0
add CB	62	48	45	55	34	46	40	29	35	235	144	208	212	160	194
siLuci	49	56	62	63	60	53	76	50	61	288	272	243	233	245	210
siCEP152	35	19	25	48	36	44	62	48	77	269	251	213	227	266	202
siCEP192	30	18	27	34	46	33	63	34	40	188	121	180	218	136	177
siMEDD1	36	43	21	31	20	19	41	33	25	198	175	96	183	140	100
PCNT KO	57	68	54	700	629	540	54	40	29	48	31	28	12	5	7
siCDK5	50	74	63	85	113	99	507	629	574	27	42	38	28	34	45
si gamma	78	54	65	195	131	140	660	438	547	45	59	31	29	16	22
siNIN	75	84	92	92	84	89	523	488	520	30	36	22	39	55	35
siDHC	73	61	56	734	589	639	37	21	44	25	20	32	76	54	65
	numbers= cells counted
		Centrin positive			No cluster			Dispersed cluster			Round cluster			Cylindrical cluster
no CB	100	100	100	0	0	0	0	0	0	0	0	0	0	0	0
add CB	10.2649	11.5663	8.52273	9.10596	8.19277	8.71212	6.62252	6.98795	6.62879	38.9073	34.6988	39.3939	35.0993	38.5542	36.7424
siLuci	6.91114	8.19912	9.85692	8.88575	8.78477	8.42607	10.7193	7.32064	9.69793	40.6206	39.8243	38.6328	32.8632	35.8712	33.3863
siCEP152	5.46022	3.06452	4.45633	7.4883	5.80645	7.84314	9.67239	7.74194	13.7255	41.9657	40.4839	37.9679	35.4134	42.9032	36.0071
siCEP192	5.62852	5.07042	5.9081	6.37899	12.9577	7.22101	11.8199	9.57746	8.75274	35.272	34.0845	39.3873	40.9006	38.3099	38.7309
siMEDD1	7.36196	10.4623	8.04598	6.33947	4.86618	7.27969	8.38446	8.0292	9.57854	40.4908	42.5791	36.7816	37.4233	34.0633	38.3142
PCNT KO	6.5442	8.7969	8.20669	80.3674	81.3713	82.0669	6.19977	5.17464	4.40729	5.51091	4.01035	4.25532	1.37773	0.646831	1.06383
siCDK5	7.1736	8.29596	7.69231	12.1951	12.6682	12.0879	72.7403	70.5157	70.0855	3.87374	4.70852	4.6398	4.01722	3.81166	5.49451
si gamma	7.74578	7.73639	8.07453	19.3644	18.7679	17.3913	65.5412	62.7507	67.9503	4.46872	8.45272	3.85093	2.87984	2.29226	2.73292
siNIN	9.88142	11.245	12.1372	12.1212	11.245	11.7414	68.9065	65.328	68.6016	3.95257	4.81928	2.90237	5.13834	7.36278	4.61741
siDHC	7.72487	8.18792	6.69856	77.672	79.0604	76.4354	3.91534	2.81879	5.26316	2.6455	2.68456	3.82775	8.04233	7.24832	7.77512
	numbers= %
