# Supplementary material for: Self-assembly of pericentriolar material in interphase cells lacking centrioles
Source: eLife. 2022 Jul 5;11:e77892. doi: 10.7554/eLife.77892 (PMC9307276; doi:10.7554/eLife.77892)
Supplement: Figure 3—source data 1. [file elife-77892-fig3-data1.xlsx]

## Sheet: Figure 3B
Figure 3B
Quantification of the normalized overall microtubule intensity in acentriolar AKAP450/CAMSAP2 KO cells
Normalized microtubules intrensity, %
si Luciferase	si PCNT	si CDK5RAP2	si NIN	si gamma-tubulin	si DHC
99.4344	31.3372	63.7347	117.183	23.0695	35.3368
98.1554	22.8602	65.4525	82.322	22.7475	37.5418
106.355	16.964	86.3929	107.155	32.6567	16.8794
114.408	35.0893	70.7844	37.939	55.834	50.8766
91.8644	27.3468	78.4397	87.2666	40.8596	36.8766
82.9254	24.3689	79.4922	110.739	35.4723	48.573
120.379	30.2552	47.6198	41.4142	22.2213	39.2596
76.341	21.3315	45.8426	67.1801	41.3603	25.2298
115.694	34.1562	60.2298	59.3461	35.383	36.8567
121.825	19.8624	48.7816	81.6369	27.7716	24.3163
113.176	39.2186	29.1319	82.0837	28.4369	15.6184
93.2388	42.663	69.5532	91.9135	29.2213	23.7404
85.2488	42.663	67.7461	38.1078	23.3234	50.7872
103.505	36.8661	61.6	102.051	27.5234	39.4085
85.0871	37.9877	48.583	104.871	34.2936	17.8028
86.2488	37.6403	81.2496	51.7702	32.5617	20.9801
64.2559	25.4211	46.8752	74.0511	22.244	35.5858
110.722	30.1758	57.539	118.99	46.3943	30.5418
69.8105	30.6026	56.2582	46.0014	31.9319	50.6383
96.6346	23.9223	39.8652	87.3064	35.705	24.0681
107.843	27.6843	80.7333	56.2383	32.0506	41.7021
121.05	34.0073	66.5943	77.5759	27.1734	26.5305
91.6644	24.7064	74.1801	97.583	23.6496	52.1475
86.0303	25.7785	68.4113	56.2085	34.6577	23.1546
121.209	41.9682	55.1064	90.2326	45.9389	43.5589
128.994	37.69	47.322	78.3702	32.3611	29.2908
85.5382	34.6426	27.7418	118.96	30.8749	40.8383
116.538	22.7907	28.1589	80.2319	19.2243	31.7234
107.937	35.3275	59.0507	64.2134	27.7649
127.256	22.0363	61.9971	79.5895	30.6857
95.19	40.8564	42.8634	58.0604	29.373
106.498	38.8513	37.8676	66.7666	27.6407
90.6327	22.1852	39.9236	71.3163	29.524
87.0093	29.8893		50.3591	22.1276
124.862	36.5314		49.2797	26.7272
84.7771	34.3173		62.7538	48.6972
101.207	40.5904			26.3659
137.238	39.4834			38.3459
107.659	32.8413			41.5971
107.987	26.9373			38.4334
77.7713	26.5683			32.3064
116.925	34.6863			30.5551
98.9385	38.0074			33.7649
89.0371	25.8044
65.7684	42.0664
135.803
72.3264
111.383
105.017
126.164
75.8248
97.1243
112.369
88.094
61.0507
99.3264

## Sheet: Figure 3D
Figure 3D
Quantification of the proportion of the non-radial microtubules in acentriolar AKAP450/CAMSAP2 KO cells lacking different PCM proteins
Normalized microtubule intensity, %
si Luciferase	si PCNT	si CDK5RAP2	si NIN	si γ-tubulin	siDHC
10.2494	41.5099	30.6932	24.4867	24.8247	54.2827
13.6001	48.2258	24.305	23.0126	21.7039	41.4481
11.8963	58.7008	27.3418	19.0637	25.3092	37.1352
16.187	49.6277	19.1582	35.1143	32.1105	47.1448
13.4149	32.3983	35.2865	19.367	28.7961	42.4231
12.2037	49.1634	35.2392	25.0456	32.4244	45.2827
12.5771	58.9298	38.6431	26.2348	25.9003	35.5361
10.1637	46.103	23.248	18.7611	34.4627	42.7722
10.5572	39.005	16.0691	29.9551	35.1106	36.5076
17.5709	52.7781	19.0285	27.9928	39.8629	36.1851
14.2854	45.9207	15.3348	15.7963	39.1959	40.69
17.4719	39.502	34.3904	24.7333	30.8819	29.8734
18.4894	44.9843	29.2872	26.4699	17.6247	38.7267
9.49933	59.1957	20.2518	18.1274	27.0386	38.1214
8.26492	57.5545	23.7859	27.2859	20.9759	44.4607
13.4659	46.6767	17.7529	23.0899	30.7771	46.199
12.8469	41.8618	25.1129	28.3685	26.4628	51.7901
8.01648	45.2229	26.6433	36.4634	19.0911	47.5333
9.35372	40.8641	33.1534	33.5806	23.567	46.4627
12.3638	41.6259	24.9788	21.1522	28.1294	55.4863
13.6339	49.8633	25.1192	18.7343	32.4439	44.1352
14.7875	48.042	19.9174	24.1527	29.1963	44.8115
8.33147	53.1051	24.1787	23.0111	32.8626	46.7564
12.0768	54.2889	23.5644	19.4656	23.8819	51.6161
15.843	39.5581	29.3393	20.415	18.7578	53.5361
	46.0343	25.0343	22.9243	34.8164
	41.2514	16.8578	18.7041	27.4311
	38.5435	25.0343	23.188	39.8278
	47.6344	20.5504	15.0114	32.7063
	38.3501	19.7591	24.7706	27.4311
	42.0251	23.7155	21.8692	41.1466
	56.8607	17.3853	18.9678	30.5962
	42.6054		16.8578	26.6398
	37.2476		23.9793	17.4082
	42.412			43.5205
	46.6673			25.321
	45.5068			26.1123
	54.4081
	37.0542
	41.4449
	33.3791
	47.8278
	38.1567
