# Supplementary material for: Self-assembly of pericentriolar material in interphase cells lacking centrioles
Source: eLife. 2022 Jul 5;11:e77892. doi: 10.7554/eLife.77892 (PMC9307276; doi:10.7554/eLife.77892)
Supplement: Figure 4—source data 1. [file elife-77892-fig4-data1.xlsx]

## Sheet: Figure 4C
Figure 4C
Quantification of area occupied by PCM clusters in each condition
(μm)
	Noco only			Noco first			Dyna first
Fix 1	Fix 2	Fix 3	Fix 1	Fix 2	Fix 3	Fix 1	Fix 2	Fix 3
14.719	11.8637	12.797	60.377	67.563	13.556	52.729	38.704	10.833
10.769	21.5667	19.026	55.816	71.372	11.411	51.444	25.102	18.846
11.446	16.2913	16.232	37.734	37.951	12.451	42.01	49.706	18.957
16.232	9.20811	5.923	26.725	45.371	10.648	33.701	73.661	11.342
12.584	15.2649	5.95	50.101	69.752	5.817	47.066	51.261	10.419
6.339	7.76881	3.243	35.673	75.102	9.165	44.943	51.319	23.254
10.99	9.24319	8.169	21.1	39.145	14.846	37.049	30.299	9.563
12.012	16.203	13.166	71.036	52.988	12.785	17.871	26.046	10.167
17.427	19.0687	10.236	65.018	54.452	16.306	28.214	36.282	14.289
5.197	22.5323	22.991	74.173	61.772	6.122	26.071	45.39	19.348
33.311	20.0321	20.673	30.53	50.9	10.358	23.703	31.043	12.458
18.736	18.2321	14.947	75.961	77.855	12.266	18.796	30.998	10.593
7.883	15.6911	9.205	57.273	79.915	4.305	27.302	50.769	6.855
17.376	8.19025	2.857	25.327	74.003	20.467	26.344	32.778	10.74
13.227	13.8957	7.894	82.72	56.878	44.212	17.205	43.924	14.042
8.682	13.8911	10.606	61.963	68.474	3.475	20.813	29.704	14.631
8.914	13.0973	7.526	65.306	47.251	15.469	16.965	35.337	10.416
11.925	12.0957	9.555	59.645	42.099	17.028	21.685	13.008	14.706
10.127	9.58317	9.772	46.528	45.153	15.937	20.004	18.907	15.719
9.848	11.725	13.1486	93.118	62.245	12.44	21.49	25.437	7.448
9.183	9.56033	15.5764	55.002	74.878	8.65	33.707	64.249	9.299
8.736	16.1344	11.0841	47.236	40.367	14.201	17.362	31.686	13.497
14.43	11.6233	9.97489	97.008	62.562	11.816	25.911	37.186	8.169
17.546	43.2791	5.50239	82.433	85.676	21.501	24.012	37.82	8.788
8.543	8.50075	4.99319	62.801	73.152	12.733	17.059	41.813	20.469
5.937	9.51711	7.12199	55.834	41.65	15.572	25.024	40.561	16.912
9.655	7.14333	12.5186	86.867	80.518	9.594	18.784	52.897	8.829
5.523	14.6878	11.8863	96.677	56.669	10.59	21.707	30.365	10.535
5.495	5.7443	22.8431	82.938	66.678	11.229	19.449	49.305	13.432
13.901	14.8314	16.1255	95.878	80.056	11.838	21.902	56.074	16.453
10.714	12.1922	14.4994	83.899	35.761	12.052	20.869	63.998	17.376
12.197	19.6107	8.65749	70.193	65.394	12.915	27.614	63.558	18.137
13.067	15.91	5.81099	74.061	58.095	4.627	20.914	74.384	29.313
31.43	33.2107	9.44439	65.335	58.271	22.745	6.784	41.79	6.696
21.092	13.2477	10.2583	106.117	48.093	7.094	9.707	46.153	15.107
18.892	8.53947		64.63	59.148	14.654	7.449	35.756	10.745
9.848	18.4992		96.181	77.907	13.051	9.902	42.564	16.337
7.883	11.8472		74.02	43.796	7.718	8.869	25.608	15.201
8.924	28.8205		90.888	67.024	20.303	15.614	42.85	19.67
			56.292	91.133	7.449	8.914	41.854	11.816
			14.725	41.382	10.703		30.017
			9.1	24.394	23.751		54.871
			18.53	34.095	18.163		47.556
				21.271	31.664		41.796
				24.093	19.918		32.157
				30.148	18.457		50.895
				28.907			41.791
				17.563			38.859
				21.145			22.195
				13.988			36.668
				17.367			46.079
				15.65			16.836
							21.877

## Sheet: Figure 4F
Figure 4F
Nomalized local microtubule density and movement velocity of PCM clusters and the in acentriolar AKAP450/CAMSAP2 KO cells treated with nocodazole
Time, sec					Normalized microtubule intensity, %													Movement velocity of PCM clusters, μm/s
2	75.9112	102.386	107.662	117.237	118.695	88.5939	86.889	96.2053	94.4061	100.233	105.2	106.582		0.075032	0.140821	0.111143	0.140821	0.213921	0.109016	0.104649	0.09589	0.119117	0.118029	0.153446	0.129796
4	81.6492	95.0964	107.662	90.9866	121.354	89.8738	97.7157	98.1387	81.8738	109.75	92.4624	98.5003		0.045018	0.164443	0.037611	0.164443	0.112782	0.089782	0.104079	0.042467	0.109772	0.10495	0.082879	0.115754
6	81.7466	94.6838	107.03	84.5457	114.03	99.8938	97.8614	100.695	86.9585	97.2789	84.3329	102.353		0.090036	0.12412	0.12575	0.12412	0.175247	0.119108	0.107302	0.103569	0.113979	0.117909	0.141189	0.128879
8	78.665	81.731	111.979	115.091	107.088	86.1319	101.016	86.8049	107.667	93.462	96.7941	96.053		0.090036	0.168983	0.120591	0.168983	0.214305	0.136254	0.135153	0.114388	0.130052	0.13755	0.151538	0.151355
10	83.4121	81.731	107.017	110.041	102.93	86.5466	100.457	99.798	90.1401	100.515	100.944	92.4439		0.090036	0.078114	0.082165	0.078114	0.000622	0.087669	0.084605	0.081026	0.082356	0.086051	0.046594	0.086882
12	83.5276	73.1763	96.5446	97.7562	107.789	88.9351	90.9858	94.7853	100.971	101.823	87.6624	87.983		0.090036	0.116816	0.12575	0.116816	0.169566	0.104471	0.119376	0.110903	0.097522	0.100898	0.13786	0.111108
14	84.8723	76.2337	99.1514	91.0658	99.0491	73.0774	91.4391	92.0119	85.2979	94.7294	93.6173	90.9194		0.076691	0.133708	0.104469	0.133708	0.16441	0.104261	0.101186	0.085241	0.10498	0.114264	0.12918	0.112859
16	86.662	85.1398	108.228	84.1922	86.6915	83.1244	97.2422	107.056	87.6222	84.0449	85.1996	98.7456		0.12005	0.110115	0.115421	0.110115	0.134166	0.104669	0.125855	0.116279	0.12142	0.12036	0.121043	0.102472
18	82.7157	84.9194	109.173	89.7791	77.5703	78.8774	91.9149	89.2378	83.6286	84.9303	97.5298	95.8458		0.060024	0.094109	0.08185	0.094109	0.116832	0.080698	0.086049	0.074843	0.077715	0.080776	0.083544	0.082252
20	81.1151	76.3726	96.5641	95.7192	81.1372	80.2517	93.9385	84.9385	82.0772	79.305	84.2863	98.3809		0.045018	0.11958	0.256129	0.11958	0.169287	0.086494	0.086261	0.156114	0.094309	0.092321	0.108742	0.105684
22	86.2331	68.6951	83.7319	89.3286	83.5695	88.1361	88.8791	88.3007	86.6949	77.7585	89.051	70.7486		0.045018	0.115436	0.202889	0.115436	0.142467	0.081038	0.085019	0.118039	0.081938	0.081417	0.093547	0.109943
24	88.8124	63.4748	74.1597	74.2226	79.3176	75.9849	79.6568	78.5348	83.9718	89.4825	65.5636	63.636		0.026691	0.070514	0.227088	0.070514	0.100541	0.041665	0.053396	0.131274	0.05389	0.0481	0.065111	0.051967
26	91.3748	69.3847	67.4305	70.1097	74.5034	80.3797	83.775	84.1457	77.3511	86.553	71.8471	64.1238		0.045018	0.128351	0.089463	0.128351	0.140047	0.096424	0.093941	0.065067	0.086504	0.085789	0.086064	0.109418
28	87.6008	75.49	65.2695	77.1603	73.1518	78.1205	78.5674	76.595	77.2217	80.7133	74.7643	67.5589		0.090036	0.080101	0.08448	0.080101	0.133956	0.089499	0.090752	0.092063	0.080054	0.088969	0.113177	0.087165
30	84.3044	78.6556	64.8537	75.0481	66.7286	82.6884	76.6596	73.8086	87.1345	70.1015	71.6188	69.8587		0.090036	0.126555	0.129718	0.126555	0.169566	0.112925	0.122343	0.105685	0.10522	0.120077	0.135162	0.122293
32	78.3964	75.785	70.2732	59.9581	72.4815	80.4497	82.0423	72.2238	66.4046	78.5549	73.3871	76.3776		0.090036	0.160211	0.295591	0.160211	0.206995	0.126387	0.138416	0.195673	0.116151	0.117981	0.160584	0.155295
34	86.0004	78.4877	67.6371	76.4716	74.3425	91.1919	78.6243	72.2911	77.8241	81.0172	77.6417	76.7475		0.052521	0.206272	0.470116	0.206272	0.197599	0.128242	0.139597	0.250845	0.12446	0.132721	0.113669	0.16451
36	82.4751	76.1655	66.1511	76.8274	62.7783	82.7765	68.7181	70.4871	81.0041	67.5499	71.566	71.7575		0.130048	0.169002	0.712401	0.169002	0.192536	0.135995	0.148287	0.426568	0.146767	0.142108	0.157671	0.161966
38	81.4702	80.8327	62.0507	76.8754	61.3294	84.32	70.7268	70.7268	81.3815	73.8672	78.854	72.3479		0.130048	0.20461	0.473999	0.20461	0.225077	0.175213	0.17462	0.296453	0.16981	0.16803	0.18734	0.191511
40	69.3788	84.0061	72.7574	68.4255	60.733	73.9149	74.0035	71.9696	67.7703	67.4497	76.057	78.5457		0.130048	0.285786	0.284597	0.285786	0.362046	0.218515	0.230538	0.203083	0.220337	0.208789	0.246562	0.274501
42	68.7571	85.7713	69.9505	54.3357	63.9035	71.4471	73.3344	69.6446	62.8587	63.7997	70.0535	81.2535		0.423369	0.30296	0.780512	0.30296	0.324872	0.366833	0.360157	0.609576	0.378165	0.360904	0.343961	0.37568
44	68.0864	84.0768	71.3361	50.5408	67.0151	74.6785	73.2274	69.1339	54.3236	72.712	62.6037	75.1947		0.416726	0.237778	0.85222	0.237778	0.326375	0.280542	0.330008	0.593579	0.333519	0.349118	0.338351	0.260794
46	69.6423	77.7894	72.8829	52.9185	66.7804	70.9034	73.8848	67.0624	59.2996	65.4774	74.3576	68.6046		0.453384	0.273802	0.90339	0.273802	0.191343	0.404441	0.370555	0.661807	0.369768	0.401292	0.352539	0.39427
48	67.53	60.9722	65.4819	59.4728	74.5449	65.204	67.066	65.8189	68.5071	69.0201	60.9864	70.5962		0.226691	0.272949	0.767293	0.272949	0.461527	0.26283	0.246729	0.464053	0.236023	0.256789	0.356771	0.261342
50	68.0313	68.7367	62.9575	57.4425	83.5781	67.399	66.6068	60.4467	65.7571	83.0903	60.8047	61.483		0.226691	0.283708	0.613287	0.283708	1.14043	0.26611	0.28166	0.472241	0.245463	0.274082	0.649655	0.290047
52	70.0002	69.9064	50.6306	66.3254	58.3813	74.4614	61.4704	56.2083	74.5434	68.6325	70.9294	58.557		0.246679	0.294469	0.742526	0.294469	1.1404	0.273307	0.300708	0.482515	0.259729	0.25921	0.746532	0.276387
54	71.8299	69.9464	48.8498	62.5774	46.6839	67.5058	60.2141	65.3909	68.9305	56.8819	67.3874	62.2575		0.246679	0.290126	0.664456	0.290126	1.20414	0.266008	0.277079	0.455568	0.28194	0.267843	0.728451	0.280409
56	68.5261	69.6522	52.8007	70.2672	46.6677	66.5869	70.7002	61.3033	67.1535	58.6998	72.3773	65.3173		0.260024	0.664456	0.671766	0.664456	1.13718	0.420413	0.505509	0.456368	0.475135	0.469095	0.732231	0.557567
58	67.81	65.9131	55.5482	72.6132	51.9635	66.1708	57.9299	61.1683	72.953	63.8881	75.4024	57.4901		0.423369	0.764456	0.748332	0.764456	0.480578	0.621898	0.536763	0.543842	0.626617	0.590216	0.503478	0.741143
60	69.4174	66.4976	42.5509	54.1466	52.9171	69.2588	57.794	55.8675	61.782	62.739	59.3312	55.6868		0.453384	0.635216	0.720409	0.635216	1.20836	0.572044	0.560688	0.65683	0.604918	0.539792	0.878558	0.592498
62	54.3608	73.9232	46.744	49.5945	44.3344	65.2315	51.3021	50.2378	55.0825	46.5305	64.3098	63.3768		0.450189	1.1651	0.92992	1.1651	1.29457	0.815803	0.800957	0.715446	0.775275	0.807645	0.865156	1.02913
64	42.6287	72.3801	50.1742	49.1513	47.8772	58.6055	49.1732	47.29	47.9941	50.1763	58.2135	59.7795		1.75719	1.74626	0.919195	1.74626	1.64725	1.5017	1.89837	1.38145	1.92891	1.67481	1.73113	1.64806
66	37.1418	78.4477	45.5327	41.2557	50.2418	63.6407	39.6011	44.8992	44.5991	44.6234	60.7394	62.9096		1.59052	1.63191	0.929918	1.63191	1.68087	1.79224	1.57184	1.3355	1.56865	1.63859	1.66702	1.81434
68	42.9233	70.1967	40.8499	32.9898	44.2145	56.56	45.8075	40.8629	40.9487	41.1628	52.1375	52.1484		1.58688	1.06408	1.05911	1.06408	1.66437	1.39451	1.30908	1.22575	1.41404	1.46291	1.88086	1.27453
70	36.2229	60.3892	30.0397	27.7821	31.6302	54.8308	35.1104	31.2399	33.3969	36.8499	44.7394	44.2898		1.20685	0.530252	1.53417	0.530252	1.14449	0.905686	0.847326	1.29227	0.82547	0.890871	1.2269	0.779835
72	33.4142	63.4065	23.1893	21.6869	28.9221	51.876	28.967	27.723	27.098	30.7826	44.1123	45.986		1.30685	0.624272	1.67193	0.624272	0.766224	0.975316	0.914041	1.4471	0.936244	1.02551	1.10089	0.827433
74	14.4755	57.9296	15.9905	18.5403	26.9348	35.3899	16.2508	14.4774	15.9421	20.0359	37.1492	40.8865		1.20685	0.623521	1.23741	0.623521	0.742441	0.907024	0.961348	1.1708	0.869791	0.911382	0.943144	0.725872
76	15.6982	53.9371	14.7756	17.4423	20.4986	34.458	15.0794	14.1993	17.4827	17.9485	36.6068	35.7754		1.20685	0.625285	1.19806	0.625285	0.779953	0.833177	0.87236	1.18028	0.972943	0.906606	0.936694	0.756064
78	22.8324	51.7804	17.1248	19.0762	13.9033	35.9553	22.1011	19.7314	19.4141	17.184	37.2153	34.1673		1.62406	0.660582	0.87446	0.660582	0.813912	1.19615	1.10988	1.34471	1.17671	1.09654	1.23445	1.07412
80	27.4958	37.1536	19.5778	18.1213	16.0289	35.0306	25.5071	24.7239	25.0007	23.6376	27.0723	31.5248		1.27012	0.707836	0.70345	0.707836	1.68655	1.03939	0.957009	1.02754	1.00791	0.995209	1.41624	0.917675
82	23.9296	26.0132	20.044	23.4677	9.41059	28.3443	24.2666	24.3789	24.5707	17.7444	26.1605	22.15		0.886938	0.709343	0.712401	0.709343	1.18866	0.806202	0.781819	0.849316	0.772342	0.739476	1.01658	0.759358
84	11.4154	21.828	15.7717	29.2226	10.1601	16.4161	13.9131	13.1542	21.5805	10.5027	28.3023	18.1922		0.783522	0.486708	0.807332	0.486708	1.18518	0.544462	0.647277	0.807224	0.66715	0.632475	1.03174	0.541591
86	14.7877	23.1482	10.4987	19.7509	16.1257	18.5421	13.2229	14.2833	19.0161	16.2008	22.143	16.5132		0.856819	0.490152	0.651263	0.490152	1.19165	0.74915	0.636291	0.785186	0.653035	0.704366	0.967671	0.620947
