# Supplementary material for: Self-assembly of pericentriolar material in interphase cells lacking centrioles
Source: eLife. 2022 Jul 5;11:e77892. doi: 10.7554/eLife.77892 (PMC9307276; doi:10.7554/eLife.77892)
Supplement: Figure 5—figure supplement 1—source data 1. [file elife-77892-fig5-figsupp1-data1.xlsx]

## Sheet: Figure 5-figure supplement 1E
Figure 5-figure supplement 1E
Normalized regrowing microtubule intensity 2min after nocodazole washout, non-radial part
si Luciferase	si PCNT	si CDK5RAP2	si NIN	si γ-tubulin	si DHC
12.1233	46.9362	15.1449	21.3106	30.6912	47.7177
9.83947	51.9787	15.4644	37.8473	40.2838	53.7826
11.7831	47.5582	17.9567	22.392	38.6853	48.672
6.02536	52.3295	27.6335	30.2017	38.0432	46.0735
11.2557	48.4695	18.5124	24.1302	36.368	37.6315
7.56376	47.3945	16.6962	16.6667	37.7661	35.9738
10.0834	47.3388	21.6837	21.4063	38.0276	39.3676
17.2762	42.3249	23.9809	21.9449	32.9424	36.5198
10.5922	44.2723	20.1265	24.9203	41.1046	38.9313
9.46405	48.3347	13.7228	17.1097	35.2698	46.95
9.97384	45.1512	25.1463	22.2206	43.2747	45.7745
11.5317	50.8614	25.1896	18.2211	34.5686	46.3153
7.30002	52.8252	20.5823	16.2322	37.7046	37.2169
7.13392	55.6838	14.7484	13.8302	40.1602	41.0609
10.2042	46.751	19.225	19.2695	41.5059	54.2566
12.5048	53.4717	24.1908	25.5215	44.1688	28
7.8146	57.1006	29.0162	14.6604	38.5505	57.1501
13.8087	51.8935	16.7	23.3225	34.6914	32.7521
11.211	45.0662	28.6063	37.6834	38.4413	47.598
10.648	41.9839	24.6696	20.4345	44.1274	49.2601
		15.9643	22.7133	35.7833
		15.6286	33.8397
		24.6992	24.9211
		27.7523	21.2488
		17.8522
