# Supplementary material for: Self-assembly of pericentriolar material in interphase cells lacking centrioles
Source: eLife. 2022 Jul 5;11:e77892. doi: 10.7554/eLife.77892 (PMC9307276; doi:10.7554/eLife.77892)
Supplement: Figure 5—source data 1. [file elife-77892-fig5-data1.xlsx]

## Sheet: Figure 5C
Figure 5C
Quantification of normalized MT intensity at 30s after nocodazole washout in control and PCM proteins depleted cells
Normalized intensity of newly growing microtubules, %
si Luciferase	si PCNT	si CDK5RAP2	si NIN	si γ-tubulin	si DHC
64.7859	41.4873	37.8406	59.0682	17.9185	70.7287
70.7738	51.9098	44.5712	62.985	9.20689	47.7002
97.6966	64.7859	23.9964	35.8821	10.8277	66.114
79.9131	47.7002	62.985	48.7582	13.4839	81.4889
123.629	29.399	20.5973	40.9695	24.0865	33.2258
74.4655	64.4482	39.2587	54.2959	18.3237	77.3694
110.078	37.818	18.2787	74.8932	14.0017	79.598
131.71	45.5617	13.9792	50.4691	8.98178	81.5339
102.919	43.3557	63.3002	43.3107	12.3809	98.2369
66.2266	51.0093	26.3376	102.154	22.961	96.1884
71.0439	28.3635	40.7895	83.8075	7.47356	72.5071
130.337	41.7349	30.8397	51.437	8.5991	151.475
92.9693	78.4724	27.148	102.154	13.529	67.6448
127.208	39.5964	25.2345	89.5252	30.5021	46.9574
102.019	18.2562	28.1834	86.4187	19.7869	82.817
121.288	28.296	59.224	72.5296	21.2276	98.2369
89.5927	74.9608	47.25	68.14	15.8701	77.7971
101.388	26.1124	32.0553	122.526	21.3402	115.007
85.0906	15.5999	25.3696	102.671	19.1791	105.688
84.6629	38.6509	30.0518	97.0213	22.0605	91.4161
100.038	17.3333	79.4404	72.5296	17.9636	134.637
85.9235	44.999	31.6051	68.14	28.206	105.553
110.325	37.9981	26.7653	53.1478	16.6354	96.2109
78.7651	19.8094	62.7824	42.005	11.1653	84.1902
134.142	34.2613	19.6744	50.0414	18.8415	59.8335
56.8171	48.8708	24.1315	68.14	18.0761	66.2266
83.1096	37.5929	24.1315	136.528	29.5791	73.8577
145.217	65.1686	25.0995	57.6725	17.7835	77.8421
71.359	43.3782	49.8388	63.908	22.3532	94.7027
101.096	33.2258	42.1401	78.675	33.496	90.4481
110.573	56.0517	37.2553	70.8863	10.7601	112.103
104.765	61.1617	29.0389	105.913	16.703	73.0023
77.4819	43.3782	67.2621	92.8118	12.9437	95.8732
110.393	53.2829	17.761	70.1885	17.851	91.1235
129.91	32.7756	44.7513	80.7235	16.703	97.3139
134.749	48.0829	20.2371	49.6587	16.0276	120.432
111.113	31.7176	26.1124	61.2967	16.9506	111.383
101.388	81.2638	25.0544	65.8214	15.5549	109.109
127.996	57.7851	27.1705	104.9	15.0147	104.09
97.0438	66.7668	49.3435	76.9417	17.9861	67.3521
		25.8874	90.223	9.13936	90.6732
		43.7488	39.6189	16.7705	96.8862
		17.4458	100.038	8.01382	74.6456
		41.7004	89.6603	6.73071	77.617
		75.546	77.4594	17.9411	94.8872
		46.5297	94.9278		73.9621
		30.2769	116.313		82.9877
		23.1861	75.1282		53.4323
		57.6198			64.693
		21.3852			67.7082
		55.2915
		40.2717
		45.3591
		42.8766
		36.6681
		39.6102
		45.0317

## Sheet: Figure 5F
Figure 5F
Normalized fluorescence intensity of PCM clusters at indicated distances
distance, μm	2	4	6	8	10	12	14	16	18	20
	8.18404	8.28669	8.63246	9.64081	10.0244	10.1823	10.4657	13.1038	11.1695	10.3152
	9.35281	9.51095	10.3303	9.85893	12.2154	11.8519	10.0371	9.42201	9.07535	8.3455
	8.96347	9.43914	10.2271	9.7553	12.1368	11.2171	11.5783	8.8348	8.74113	9.11235
	13.4815	8.77233	9.76531	8.94332	11.5975	10.4975	11.3023	8.50073	8.12184	9.01929
nocodazole	11.7599	8.12883	9.73805	9.36514	11.461	10.749	11.299	8.44506	8.45002	10.6047
washout 5min	10.6856	9.11656	7.74642	11.8521	11.1691	8.31392	8.67506	13.5445	7.77339	11.1235
	9.58886	8.79398	11.9367	9.1424	12.4916	9.60424	10.9331	8.62222	10.0969	8.78997
	13.5889	12.994	9.90449	8.46498	10.8465	10.572	10.6105	7.32222	7.65081	8.04571
	12.4082	9.01123	9.9387	7.66949	12.8717	10.7892	10.5178	9.33113	8.08067	9.38212
	8.10816	8.12766	12.4238	8.44383	10.6614	12.5286	10.2668	8.50694	8.41326	12.5196
	9.7639	11.5703	10.8828	11.0668	10.8253	10.8893	10.5947	6.70366	9.28211	8.42201
	10.2529	10.915	10.8828	12.0668	10.9893	9.08599	9.44715	10.3594	7.872	8.12874
	29.4272	24.4583	17.2972	3.86007	1.86498	7.15537	3.33984	4.92056	5.95672	1.72039
	27.9886	20.1469	10.9653	4.92988	5.26697	5.37504	6.65819	6.34747	6.07145	6.25016
	21.5097	24.2941	20.4799	9.9677	5.284	3.19912	4.72214	3.88016	3.25451	3.40885
	21.4144	24.4357	20.4165	10.2545	5.29811	3.39353	4.47292	3.68904	3.34862	3.27672
nocodazole	21.7594	24.185	20.3922	9.97881	5.00946	3.13221	4.84417	4.03168	3.36467	3.30245
washout 10min	20.1871	25.8747	19.8025	8.96769	6.21947	2.1991	3.72213	4.49305	4.18998	4.34432
	21.9935	24.4553	19.996	9.16124	5.44528	2.39265	4.88342	4.36402	3.41579	3.89271
	25.4023	21.7598	15.3202	8.73633	4.29923	3.11698	4.72271	3.1216	8.45855	5.06242
	26.0531	21.1147	14.8363	10.0912	2.36374	4.72988	6.33561	4.73456	3.81338	5.92758
	27.1983	20.6469	15.175	11.2363	4.47665	2.97182	4.90013	5.23456	3.9908	4.16951
	24.0693	22.034	12.3686	9.7202	4.57342	4.03633	6.93238	5.65391	6.66822	3.9437
	20.8483	22.7324	16.1315	11.0638	4.30407	4.08956	6.34045	4.41682	5.75371	4.31951
	42.3078	19.4657	4.92314	4.75233	5.225	5.09219	4.59895	4.49512	4.62791	4.51194
	49.1832	18.3331	3.03669	2.57721	3.78477	3.98439	6.07155	4.38571	4.38204	4.26124
	46.4512	18.4098	12.6646	8.36692	4.00069	2.22008	2.84026	2.21466	1.08761	1.74421
	40.056	19.2515	13.3011	9.35372	4.71481	3.1145	3.29105	2.72356	1.88173	2.31209
nocodazole	46.7009	18.3008	12.5768	8.37804	3.72616	2.15319	2.9623	2.3662	1.19778	1.63781
washout 15min	45.1286	19.9905	11.9871	7.36693	4.93618	1.22009	1.84026	2.82757	2.0231	2.6797
	46.9351	18.5711	12.1807	7.56047	4.16198	1.41363	3.00155	2.69853	1.2489	2.22808
	46.9351	18.5711	12.1807	7.56047	4.16198	1.41363	3.00155	2.69853	1.2489	2.22808
	44.5891	16.2251	9.83468	5.21448	1.81599	-0.93236	0.655558	0.352544	-1.09709	-0.11791
	52.2155	19.7525	7.35927	6.57721	2.94606	0.887618	4.26509	0.966355	3.22075	1.80962
	53.5026	25.1041	3.00121	4.63851	1.65252	1.85214	2.97155	3.54378	0.636884	3.09673
	51.28	22.688	6.74637	3.70624	3.3009	0.597296	3.32961	3.90184	1.6401	2.80962
