# Supplementary material for: Self-assembly of pericentriolar material in interphase cells lacking centrioles
Source: eLife. 2022 Jul 5;11:e77892. doi: 10.7554/eLife.77892 (PMC9307276; doi:10.7554/eLife.77892)
Supplement: Figure 6—figure supplement 1—source data 1. [file elife-77892-fig6-figsupp1-data1.xlsx]

## Sheet: Figure 6-figure supplement 1E
Figure 6-figure supplement 1E
Quantification of length of the movement trajectories of PCM clusters
(μm)
-Dyna	1h post Dyna treatment
44.771	4.016
11.914	2.634
7.094	3.207
16.011	4.793
14.611	3.073
8.881	3.838
2.592	1.748
0.894	2.642
4.761	1.072
6.206	1.908
7.632	3
5.049	1.455
10.494	2.044
2.298	2.717
11.812	2.28
12.125	4.136
5.15	2.201
11.626	1.775
9.988	2.193
1.614	1.047
2.695	0.594
0.906	1.119
4.359	1.829
4.359	1.522
2.922	1.516
4.251	3.894
6.652	4.258
5.7	4.835
6.021	6.509
12.732	1.956
6.105	2.052
4.125	2.353
10.349	3.177
16.846	2.608
0.906	5.25
1.171	3.992
0.821	2.276
1.173	2.796
1.818	1.759
2.181	1.814
1.499	1.387
6.08	2.581
2.026	1.647
8.142	2.481
3.724	1.999
7.363	3.848
5.417	4.631
18.714	4.81
11.911	3.298
20.987	2.226
11.663	3.669
6.982	6.141
7.717	2.984
16.096	1.396
25.102	1.111
5.353	0.737
13.786	4.023
26.771	1.562
18.004	2.393
15.722	2.512
9.083	3.604
6.733	3.041
24.026	1.772
9.145	1.278
3.822	1.183
9.17	0.862
3.811	0.751
5.39	2.193
1.278	1.733
2.494	4.103
1.229	1.49
0.787	0.9
1.635	1.517
1.287	2.883
2.78	1.463
1.08	2.287
0.864	3.321
0.949	4.271
0.554	2.172
4.107	0.81
5.375	0.603
1.377	0.937
7.376	2.317
8.927	2.31
6.396	3.652
1.968	3.407
1.111	3.833
6.095	0.474
1.524	0.386
1.323	0.627
16.875	1.741
21.678	0.822
15.043	1.181
1.365	0.578
1.863	3.393
29.026	0.659
19.011	0.451
34.211	1.014
13.996	0.688
17.306	1.432
5.051	0.942
16.736	1.323
11.035	1.052
20.735	1.217
18.156	0.695
17.729	0.774
11.307	0.659
13.368	0.515
2.021	2.682
7.078	3.797
11.367	3.219
7.045
9.335
26.913
25.735
12.858
5.064
8.016
18.73
7.744
3.629
19.162
26.546
3.961
8.376
3.769
2.618
2.114
4.708
8.624
18.997
21.812
