# Supplementary material for: Self-assembly of pericentriolar material in interphase cells lacking centrioles
Source: eLife. 2022 Jul 5;11:e77892. doi: 10.7554/eLife.77892 (PMC9307276; doi:10.7554/eLife.77892)
Supplement: Figure 6—source data 1. [file elife-77892-fig6-data1.xlsx]

## Sheet: Figure 6G
Figure 6G
Quantification of the proportion of cells with a radial, whirlpool-like or non-radial microtubule organization with and without rapalog treatment
% of cells
		Radial			Whirlpool-like			Non-radial
-Rapa	19.1304	13.5714	15.7233	0	0	0.628931	80.8696	86.4286	83.6478
+Rapa	72.6415	78.4	73.3766	24.5283	13.6	18.8312	2.83019	8	7.79221
number of cells
		Radial			Whirlpool-like			Non-radial
- rapa	22	19	25	0	0	1	93	121	133
add rapa	77	98	113	26	17	29	3	10	12
