# Supplementary material for: Self-assembly of pericentriolar material in interphase cells lacking centrioles
Source: eLife. 2022 Jul 5;11:e77892. doi: 10.7554/eLife.77892 (PMC9307276; doi:10.7554/eLife.77892)
Supplement: Figure 7—source data 1. [file elife-77892-fig7-data1.xlsx]

## Sheet: Figure 7D
Figure 7D
Quantification of the proportion of cells with different types of microtubule minus end organization before and after overnight rapalog treatment
		number of cells
			Bundled			Organized (ring-like)			Organized (radial)			Disorganized
AKAP450/CAMSAP2/p53/PCNT KO	-Rapa	0	0	0	5	7	3	12	17	21	79	102	88
	+Rapa	0	0	0	82	120	133	7	20	15	8	16	23
AKAP450/CAMSAP2/CDK5RAP2/MMG/p53/PCNT KO	-Rapa	0	0	0	1	0	4	6	10	7	73	41	64
	+Rapa	33	44	37	22	43	27	8	12	10	1	0	2
		% of cells
			Bundled			Organized (ring-like)			Organized (radial)			Disorganized
AKAP450/CAMSAP2/p53/PCNT KO	-Rapa	0	0	0	5.20833	5.55556	2.67857	12.5	13.4921	18.75	82.2917	80.9524	78.5714
	+Rapa	0	0	0	84.5361	76.9231	77.7778	7.2165	12.8205	8.77193	8.24742	10.2564	13.4503
AKAP450/CAMSAP2/CDK5RAP2/MMG/p53/PCNT KO	-Rapa	0	0	0	1.51515	0	5.15464	7.57576	20.3125	9.27835	90.9091	79.6875	85.567
	+Rapa	51.9685	44.4444	49.5413	34.6457	43.2099	34.8624	11.811	12.3457	12.844	1.5748	0	2.75229
