# Supplementary material for: Self-assembly of pericentriolar material in interphase cells lacking centrioles
Source: eLife. 2022 Jul 5;11:e77892. doi: 10.7554/eLife.77892 (PMC9307276; doi:10.7554/eLife.77892)
Supplement: Figure 8—figure supplement 1—source data 1. [file elife-77892-fig8-figsupp1-data1.xlsx]

## Sheet: Figure 8 - figure supplement 1A
Figure 8 - figure supplement 1A
Systematic alteration of the composition of the Cytosim simulations of PCM and microtubule self-organization.
number of adhesive PCM complexes (all MT-nucleating)	10	30	50	70	100	150	200	300	400	600
simulation 1	5.8657	1.0583	0.2687	0.4271	2.323	0.6383	0.4832	0.586	0.6528	0.7814
simulation 2	5.0146	0.716	0.9755	0.4771	0.4521	0.4307	0.4829	0.577	0.6599
simulation 3	2.6063	2.8637	2.2642	1.1953	1.4043	0.4172	0.5748	0.578	0.6685
simulation 4	0.1837	1.3661	2.3814	0.5603	0.5537	0.482	0.4732	0.5886	0.6582
simulation 5	4.0962	3.5116	1.4492	0.4506	1.6827	0.417	0.4761	0.5668	0.6462
simulation 6	6.4631	3.1363	0.4132	1.662	0.3398	0.4367
simulation 7	7.1739	0.2173	2.6	2.0737	0.6918	0.4799
simulation 8	5.2766	3.6028	0.2629	0.7412	0.3663	0.4094
simulation 9	6.0485	3.27	4.2832	0.31	0.4445	0.4948
simulation 10	0.8566	2.222
simulation 11	2.6439	1.5888
simulation 12	6.019	4.5737
simulation 13	5.0659	0.2145
mean of all simulations	4.4088	2.1801	1.6553	0.8775	0.9176	0.4673	0.498	0.5793	0.6571	0.7814

## Sheet: Figure 8 - figure supplement 1B
Figure 8 - figure supplement 1B
number of MTs nucleatind from an adhesive PCM complex	1	2	3	4
simulation 1	0.5748	0.5984	0.5792	0.5671
simulation 2	0.5815	0.5728	0.586	0.5577
simulation 3	0.5798	0.5896	0.5714	0.5712
simulation 4	0.586	0.5833	0.565	0.5633
simulation 5	0.5714	0.5802	0.5789	0.5765
mean of all simulations	0.5787	0.5849	0.5761	0.5672

## Sheet: Figure 8 - figure supplement 1C
Figure 8 - figure supplement 1C
number of immobile MTs	10	50	100	150	200	250	300	350	400
simulation 1	3.7526	1.7174	3.8049	5.8988	5.5197	5.0467	5.1784	5.6306	5.8821
simulation 2	1.2273	1.8026	2.3436	6.3585	5.5632	4.4261	5.2999	5.1061
simulation 3	4.1948	5.5652	4.185	5.1859	5.1557	5.5588	6.0323	5.3886
simulation 4	1.0835	3.1727	4.9575	5.3204	2.82	5.7537	6.6909	5.4704
simulation 5	4.3512	2.3072	3.1244	3.7358	6.3253	5.9929		6.0539
mean of all simulations	2.9219	2.913	3.6831	5.2999	5.0768	5.3556	5.8004	5.5299	5.8821

## Sheet: Figure 8 - figure supplement 1D
Figure 8 - figure supplement 1D
fraction of PCM complexes nucleating MTs	0.0333	0.1667	0.25	0.3333	0.4167	0.5	0.6667
simulation 1	2.4086	2.1523	2.3288	2.6855	1.4518	1.2189	1.0413
simulation 2			2.2889	2.9138	1.2189	2.0946
simulation 3			2.3751	1.8053	2.0946	1.4518
simulation 4			2.1784	2.6576	2.3187	1.8705
simulation 5			2.3802	1.9815	1.8705	0.6725
mean of all simulations	2.4086	2.1523	2.3103	2.4088	1.7909	1.4617	1.0413

## Sheet: Figure 8 - figure supplement 1E
Figure 8 - figure supplement 1E
fraction of peripherally-placed immobile MTs	0	0.1667	0.3333	0.5	0.6667	0.8333	1
simulation 1	6.6569	7.2635	6.395	7.4475	8.7355	8.1971	8.7874
simulation 2	6.5722	6.171	7.3082	7.4651	6.677	7.883	9.3008
simulation 3	6.0129	7.1994	7.6645	7.9511	7.3743	8.7254	6.1107
simulation 4	5.4075	6.609	7.8318	7.0505	8.7737	9.1394	8.4754
simulation 5	5.9134	6.3552	7.0753	5.2247	7.6905	9.0659	4.7939
mean of all simulations	6.1126	6.7196	7.2549	7.0278	7.8502	8.6022	7.4936

## Sheet: Figure 8 - figure supplement 1F
Figure 8 - figure supplement 1F
number of non-adhesive CAMSAP-kin14 complexes (all MT-nucleating)	10	30	50	70	100	150	200	300	400	600
simulation 1	6.7495	5.277	1.1827	1.1627	1.6254	0.8165	0.9723	1.2448	1.3447	1.632
simulation 2	4.9314	2.2197	2.5106	2.0554	0.7705	0.851	0.9667	1.2226	1.3869
simulation 3	3.0856	6.4787	2.5529	2.743	0.9679	0.8745	0.9547	1.2101	1.3478
simulation 4	3.8825	4.0971	2.4312	0.9712	0.7386	0.7842	0.9223	1.1425	1.3928
simulation 5	5.8021	4.7476	2.9681	2.2539	1.0437	0.849	1.0797	1.2597	1.3616
simulation 6								1.2284
mean of all simulations	4.8902	4.564	2.3291	1.8372	1.0292	0.835	0.9791	1.218	1.3668	1.632

## Sheet: Figure 8 - figure supplement 1G
Figure 8 - figure supplement 1G
Fraction of adhesive PCM complexes (all MT-nucleating)	0	0.1667	0.3333	0.5	0.6667	0.8333	1
simulation 1	1.2096	0.9309	0.7651	0.6231	0.6884	0.59	0.5659
simulation 2	1.1417	1.0586	0.7733	0.7135	0.6426	0.6214	0.6135
simulation 3	1.1564	0.9961	0.7242	0.7461	0.626	0.6152	0.5879
simulation 4	1.2198	0.9396	1.146	0.6253	0.5941	0.6537	0.5824
simulation 5	1.169	1.0831	0.733	0.6634	0.6006	0.9928	0.5796
mean of all simulations	1.1793	1.0017	0.8283	0.6743	0.6304	0.6946	0.5859
