# Supplementary material for: Self-assembly of pericentriolar material in interphase cells lacking centrioles
Source: eLife. 2022 Jul 5;11:e77892. doi: 10.7554/eLife.77892 (PMC9307276; doi:10.7554/eLife.77892)
Supplement: Figure 8—source data 1. [file elife-77892-fig8-data1.xlsx]

## Sheet: Figure 8E
Figure 8E
Distance of all PCM clusters to the center of mass related to System 1 to system 4
System1			System2			System3			System4
Distance to center of mass (μm)	Cumilative distribution		Distance to center of mass (μm)	Cumilative distribution		Distance to center of mass (μm)	Cumilative distribution		Distance to center of mass (μm)	Cumilative distribution
0.03592	0.003333		0.212634	0.003333		1.84217	0.003333		0.003177	0.003333
0.065045	0.006667		0.561072	0.006667		2.06323	0.006667		0.082286	0.006667
0.06762	0.01		0.672113	0.01		2.10439	0.01		0.082482	0.01
0.10189	0.013333		0.71209	0.013333		2.16123	0.013333		0.082576	0.013333
0.10813	0.016667		0.721119	0.016667		2.42373	0.016667		0.084308	0.016667
0.108574	0.02		0.861723	0.02		2.51751	0.02		0.092329	0.02
0.111249	0.023333		0.921697	0.023333		2.6582	0.023333		0.101799	0.023333
0.135362	0.026667		0.946969	0.026667		2.713	0.026667		0.147042	0.026667
0.147008	0.03		0.970223	0.03		2.73566	0.03		0.147288	0.03
0.147398	0.033333		0.978944	0.033333		2.75258	0.033333		0.149305	0.033333
0.153524	0.036667		0.979273	0.036667		2.76327	0.036667		0.15085	0.036667
0.155383	0.04		0.985498	0.04		2.80345	0.04		0.152466	0.04
0.159761	0.043333		0.996547	0.043333		3.00322	0.043333		0.15484	0.043333
0.174376	0.046667		1.00738	0.046667		3.01441	0.046667		0.156617	0.046667
0.180707	0.05		1.0292	0.05		3.03444	0.05		0.16044	0.05
0.191925	0.053333		1.04478	0.053333		3.04747	0.053333		0.174494	0.053333
0.192649	0.056667		1.05922	0.056667		3.05104	0.056667		0.17454	0.056667
0.197225	0.06		1.06256	0.06		3.09416	0.06		0.176244	0.06
0.197461	0.063333		1.06533	0.063333		3.1086	0.063333		0.180372	0.063333
0.202741	0.066667		1.0665	0.066667		3.11003	0.066667		0.185695	0.066667
0.211001	0.07		1.0698	0.07		3.3794	0.07		0.207684	0.07
0.217799	0.073333		1.07671	0.073333		3.4806	0.073333		0.212037	0.073333
0.226051	0.076667		1.08276	0.076667		3.56282	0.076667		0.22361	0.076667
0.229698	0.08		1.10496	0.08		3.57251	0.08		0.226931	0.08
0.231449	0.083333		1.11306	0.083333		3.63179	0.083333		0.227232	0.083333
0.245711	0.086667		1.11578	0.086667		3.669	0.086667		0.227393	0.086667
0.245964	0.09		1.1194	0.09		3.67572	0.09		0.23379	0.09
0.251208	0.093333		1.12469	0.093333		3.68337	0.093333		0.234916	0.093333
0.251688	0.096667		1.12545	0.096667		3.69229	0.096667		0.236634	0.096667
0.254856	0.1		1.13186	0.1		3.70834	0.1		0.237717	0.1
0.263718	0.103333		1.13237	0.103333		3.72897	0.103333		0.240693	0.103333
0.26378	0.106667		1.13282	0.106667		3.74078	0.106667		0.242295	0.106667
0.263887	0.11		1.13954	0.11		3.78689	0.11		0.243143	0.11
0.266469	0.113333		1.1411	0.113333		3.79125	0.113333		0.245225	0.113333
0.274867	0.116667		1.14732	0.116667		3.81276	0.116667		0.268936	0.116667
0.275883	0.12		1.15455	0.12		3.822	0.12		0.269297	0.12
0.284984	0.123333		1.15731	0.123333		3.83491	0.123333		0.269882	0.123333
0.290785	0.126667		1.15761	0.126667		3.84737	0.126667		0.279723	0.126667
0.294295	0.13		1.16507	0.13		3.86478	0.13		0.282083	0.13
0.309529	0.133333		1.16566	0.133333		3.90257	0.133333		0.282773	0.133333
0.309732	0.136667		1.1683	0.136667		3.90302	0.136667		0.28318	0.136667
0.30986	0.14		1.17685	0.14		3.99687	0.14		0.286281	0.14
0.31042	0.143333		1.1805	0.143333		4.05171	0.143333		0.287767	0.143333
0.310723	0.146667		1.19045	0.146667		4.06442	0.146667		0.290833	0.146667
0.319083	0.15		1.19152	0.15		4.09385	0.15		0.300128	0.15
0.324978	0.153333		1.19226	0.153333		4.1108	0.153333		0.302827	0.153333
0.326178	0.156667		1.19602	0.156667		4.11214	0.156667		0.308824	0.156667
0.326437	0.16		1.19757	0.16		4.12763	0.16		0.317403	0.16
0.330374	0.163333		1.19798	0.163333		4.13605	0.163333		0.31759	0.163333
0.33167	0.166667		1.20098	0.166667		4.13885	0.166667		0.317654	0.166667
0.334972	0.17		1.20103	0.17		4.17568	0.17		0.32109	0.17
0.338095	0.173333		1.20114	0.173333		4.21594	0.173333		0.326148	0.173333
0.341193	0.176667		1.202	0.176667		4.24124	0.176667		0.329035	0.176667
0.342588	0.18		1.20229	0.18		4.27194	0.18		0.330297	0.18
0.34316	0.183333		1.20259	0.183333		4.35308	0.183333		0.332188	0.183333
0.344338	0.186667		1.20511	0.186667		4.37128	0.186667		0.333415	0.186667
0.346232	0.19		1.20848	0.19		4.42116	0.19		0.339273	0.19
0.352104	0.193333		1.20976	0.193333		4.46948	0.193333		0.345124	0.193333
0.357275	0.196667		1.21073	0.196667		4.54593	0.196667		0.345242	0.196667
0.368318	0.2		1.21281	0.2		4.54851	0.2		0.351462	0.2
0.374715	0.203333		1.21448	0.203333		4.56041	0.203333		0.351571	0.203333
0.377997	0.206667		1.21571	0.206667		4.56901	0.206667		0.351713	0.206667
0.378332	0.21		1.21779	0.21		4.58609	0.21		0.358361	0.21
0.379828	0.213333		1.2186	0.213333		4.59173	0.213333		0.358566	0.213333
0.388553	0.216667		1.22028	0.216667		4.61692	0.216667		0.365743	0.216667
0.390089	0.22		1.22073	0.22		4.63073	0.22		0.367605	0.22
0.393215	0.223333		1.22449	0.223333		4.67049	0.223333		0.369087	0.223333
0.395527	0.226667		1.22941	0.226667		4.70068	0.226667		0.369603	0.226667
0.39737	0.23		1.23136	0.23		4.74528	0.23		0.371013	0.23
0.401514	0.233333		1.23595	0.233333		4.74629	0.233333		0.373609	0.233333
0.402123	0.236667		1.2363	0.236667		4.76811	0.236667		0.383752	0.236667
0.404682	0.24		1.24129	0.24		4.80922	0.24		0.389161	0.24
0.405195	0.243333		1.24275	0.243333		4.81011	0.243333		0.389561	0.243333
0.411074	0.246667		1.24303	0.246667		4.82407	0.246667		0.389945	0.246667
0.41274	0.25		1.24549	0.25		4.84758	0.25		0.39507	0.25
0.41424	0.253333		1.2507	0.253333		4.87946	0.253333		0.403622	0.253333
0.414354	0.256667		1.25136	0.256667		4.91914	0.256667		0.404766	0.256667
0.414909	0.26		1.25487	0.26		4.92843	0.26		0.404793	0.26
0.415468	0.263333		1.25576	0.263333		4.94151	0.263333		0.406994	0.263333
0.424311	0.266667		1.2569	0.266667		4.9924	0.266667		0.407701	0.266667
0.424664	0.27		1.25853	0.27		4.99571	0.27		0.411808	0.27
0.426813	0.273333		1.26202	0.273333		5.02495	0.273333		0.41214	0.273333
0.427107	0.276667		1.26256	0.276667		5.12044	0.276667		0.413637	0.276667
0.427352	0.28		1.26355	0.28		5.12505	0.28		0.41531	0.28
0.434026	0.283333		1.26603	0.283333		5.13683	0.283333		0.423874	0.283333
0.439168	0.286667		1.26881	0.286667		5.38384	0.286667		0.424975	0.286667
0.447093	0.29		1.27055	0.29		5.55683	0.29		0.432426	0.29
0.44771	0.293333		1.27061	0.293333		5.65969	0.293333		0.435241	0.293333
0.457316	0.296667		1.2709	0.296667		5.67199	0.296667		0.435539	0.296667
0.457885	0.3		1.27285	0.3		5.67678	0.3		0.436514	0.3
0.463402	0.303333		1.27332	0.303333		5.69675	0.303333		0.438771	0.303333
0.463972	0.306667		1.27798	0.306667		5.70926	0.306667		0.439657	0.306667
0.465379	0.31		1.28004	0.31		5.72067	0.31		0.445291	0.31
0.466631	0.313333		1.28282	0.313333		5.74425	0.313333		0.445631	0.313333
0.468559	0.316667		1.284	0.316667		5.74869	0.316667		0.450889	0.316667
0.468564	0.32		1.28544	0.32		5.78997	0.32		0.451539	0.32
0.475581	0.323333		1.28649	0.323333		5.79993	0.323333		0.451622	0.323333
0.47673	0.326667		1.28669	0.326667		5.84455	0.326667		0.454741	0.326667
0.486774	0.33		1.28921	0.33		5.89382	0.33		0.455218	0.33
0.487501	0.333333		1.29141	0.333333		5.89617	0.333333		0.457072	0.333333
0.488084	0.336667		1.29278	0.336667		5.93318	0.336667		0.459045	0.336667
0.489488	0.34		1.29524	0.34		5.98914	0.34		0.467018	0.34
0.489945	0.343333		1.29754	0.343333		6.04025	0.343333		0.47056	0.343333
0.491371	0.346667		1.29787	0.346667		6.07259	0.346667		0.471839	0.346667
0.491858	0.35		1.30087	0.35		6.1044	0.35		0.471864	0.35
0.495399	0.353333		1.30096	0.353333		6.12216	0.353333		0.47339	0.353333
0.496005	0.356667		1.30286	0.356667		6.13605	0.356667		0.476791	0.356667
0.497197	0.36		1.30584	0.36		6.1569	0.36		0.478947	0.36
0.499709	0.363333		1.30683	0.363333		6.18024	0.363333		0.480133	0.363333
0.502592	0.366667		1.30706	0.366667		6.19917	0.366667		0.484112	0.366667
0.502629	0.37		1.30762	0.37		6.22335	0.37		0.48673	0.37
0.505636	0.373333		1.30984	0.373333		6.22765	0.373333		0.486771	0.373333
0.505846	0.376667		1.31015	0.376667		6.24745	0.376667		0.489695	0.376667
0.5077	0.38		1.31328	0.38		6.26035	0.38		0.493214	0.38
0.508876	0.383333		1.31463	0.383333		6.27603	0.383333		0.49765	0.383333
0.508959	0.386667		1.31581	0.386667		6.27978	0.386667		0.506153	0.386667
0.51561	0.39		1.31581	0.39		6.28296	0.39		0.508594	0.39
0.529144	0.393333		1.31892	0.393333		6.28818	0.393333		0.512187	0.393333
0.529433	0.396667		1.31897	0.396667		6.30647	0.396667		0.513923	0.396667
0.532428	0.4		1.31926	0.4		6.31182	0.4		0.515623	0.4
0.533675	0.403333		1.32093	0.403333		6.3179	0.403333		0.517764	0.403333
0.534612	0.406667		1.32169	0.406667		6.31971	0.406667		0.517973	0.406667
0.537793	0.41		1.3302	0.41		6.32649	0.41		0.518436	0.41
0.540575	0.413333		1.33062	0.413333		6.33184	0.413333		0.519789	0.413333
0.542449	0.416667		1.33134	0.416667		6.34426	0.416667		0.520429	0.416667
0.542869	0.42		1.33148	0.42		6.36409	0.42		0.521868	0.42
0.551022	0.423333		1.33197	0.423333		6.36737	0.423333		0.527481	0.423333
0.552165	0.426667		1.33267	0.426667		6.37889	0.426667		0.528642	0.426667
0.553211	0.43		1.33542	0.43		6.39156	0.43		0.532641	0.43
0.555632	0.433333		1.3357	0.433333		6.3977	0.433333		0.532888	0.433333
0.557509	0.436667		1.33718	0.436667		6.44481	0.436667		0.53445	0.436667
0.55863	0.44		1.33804	0.44		6.45722	0.44		0.534586	0.44
0.559492	0.443333		1.3381	0.443333		6.51495	0.443333		0.534915	0.443333
0.559838	0.446667		1.33911	0.446667		6.61487	0.446667		0.535021	0.446667
0.563055	0.45		1.34059	0.45		6.63847	0.45		0.539775	0.45
0.566928	0.453333		1.34294	0.453333		6.65837	0.453333		0.543549	0.453333
0.572271	0.456667		1.34586	0.456667		6.66092	0.456667		0.544671	0.456667
0.572498	0.46		1.34634	0.46		6.6797	0.46		0.545748	0.46
0.573874	0.463333		1.3464	0.463333		6.76695	0.463333		0.546314	0.463333
0.57572	0.466667		1.34703	0.466667		6.76882	0.466667		0.547195	0.466667
0.577885	0.47		1.34707	0.47		6.79407	0.47		0.548635	0.47
0.578818	0.473333		1.34799	0.473333		6.7981	0.473333		0.551771	0.473333
0.579816	0.476667		1.34921	0.476667		6.81538	0.476667		0.556716	0.476667
0.581998	0.48		1.34945	0.48		6.88117	0.48		0.557989	0.48
0.584084	0.483333		1.35088	0.483333		6.88621	0.483333		0.563688	0.483333
0.584673	0.486667		1.35496	0.486667		6.89978	0.486667		0.568999	0.486667
0.585521	0.49		1.35892	0.49		6.90476	0.49		0.57158	0.49
0.586823	0.493333		1.35961	0.493333		6.93796	0.493333		0.572737	0.493333
0.590125	0.496667		1.36205	0.496667		6.94956	0.496667		0.575055	0.496667
0.591411	0.5		1.36268	0.5		6.95532	0.5		0.576122	0.5
0.591934	0.503333		1.36589	0.503333		6.96065	0.503333		0.580478	0.503333
0.596489	0.506667		1.36697	0.506667		6.97456	0.506667		0.582664	0.506667
0.597398	0.51		1.36708	0.51		6.98243	0.51		0.584932	0.51
0.60193	0.513333		1.36857	0.513333		6.99545	0.513333		0.587504	0.513333
0.602372	0.516667		1.36976	0.516667		6.99737	0.516667		0.587786	0.516667
0.610669	0.52		1.37605	0.52		7.00188	0.52		0.588445	0.52
0.618636	0.523333		1.37617	0.523333		7.008	0.523333		0.592391	0.523333
0.619447	0.526667		1.37764	0.526667		7.04014	0.526667		0.594587	0.526667
0.619743	0.53		1.37871	0.53		7.06077	0.53		0.594737	0.53
0.619998	0.533333		1.37986	0.533333		7.07833	0.533333		0.595517	0.533333
0.623787	0.536667		1.38151	0.536667		7.08091	0.536667		0.598456	0.536667
0.624555	0.54		1.38187	0.54		7.09581	0.54		0.600006	0.54
0.626037	0.543333		1.38296	0.543333		7.10629	0.543333		0.603386	0.543333
0.627295	0.546667		1.38816	0.546667		7.11515	0.546667		0.605049	0.546667
0.627537	0.55		1.38959	0.55		7.11718	0.55		0.606709	0.55
0.632244	0.553333		1.39139	0.553333		7.11776	0.553333		0.607705	0.553333
0.637839	0.556667		1.39272	0.556667		7.17798	0.556667		0.611043	0.556667
0.638389	0.56		1.39335	0.56		7.18628	0.56		0.61232	0.56
0.63862	0.563333		1.39357	0.563333		7.19639	0.563333		0.614309	0.563333
0.642374	0.566667		1.39567	0.566667		7.20292	0.566667		0.614532	0.566667
0.642854	0.57		1.39582	0.57		7.22882	0.57		0.616043	0.57
0.643422	0.573333		1.39617	0.573333		7.23369	0.573333		0.617437	0.573333
0.645858	0.576667		1.39685	0.576667		7.25447	0.576667		0.622078	0.576667
0.649541	0.58		1.39701	0.58		7.25481	0.58		0.625109	0.58
0.650082	0.583333		1.39773	0.583333		7.26066	0.583333		0.62553	0.583333
0.655972	0.586667		1.39916	0.586667		7.26083	0.586667		0.626371	0.586667
0.656338	0.59		1.39961	0.59		7.28641	0.59		0.629963	0.59
0.656638	0.593333		1.39973	0.593333		7.28837	0.593333		0.630381	0.593333
0.65916	0.596667		1.40003	0.596667		7.29246	0.596667		0.630546	0.596667
0.659662	0.6		1.40277	0.6		7.29534	0.6		0.630808	0.6
0.660129	0.603333		1.4041	0.603333		7.30118	0.603333		0.633782	0.603333
0.661047	0.606667		1.40533	0.606667		7.3114	0.606667		0.637146	0.606667
0.664071	0.61		1.40849	0.61		7.31494	0.61		0.638918	0.61
0.664412	0.613333		1.41	0.613333		7.35237	0.613333		0.64208	0.613333
0.664684	0.616667		1.41223	0.616667		7.36689	0.616667		0.643273	0.616667
0.666703	0.62		1.41228	0.62		7.36759	0.62		0.643424	0.62
0.667239	0.623333		1.41307	0.623333		7.37002	0.623333		0.643682	0.623333
0.669065	0.626667		1.41507	0.626667		7.39673	0.626667		0.643964	0.626667
0.669736	0.63		1.41672	0.63		7.40933	0.63		0.6477	0.63
0.671727	0.633333		1.41683	0.633333		7.41136	0.633333		0.656514	0.633333
0.672065	0.636667		1.41727	0.636667		7.41254	0.636667		0.658148	0.636667
0.672568	0.64		1.41871	0.64		7.46651	0.64		0.663732	0.64
0.675935	0.643333		1.42023	0.643333		7.46869	0.643333		0.668476	0.643333
0.685637	0.646667		1.42038	0.646667		7.49302	0.646667		0.668911	0.646667
0.692611	0.65		1.42424	0.65		7.50136	0.65		0.669955	0.65
0.694789	0.653333		1.4299	0.653333		7.54592	0.653333		0.672084	0.653333
0.697638	0.656667		1.43064	0.656667		7.55869	0.656667		0.672304	0.656667
0.701235	0.66		1.43086	0.66		7.58222	0.66		0.673523	0.66
0.701655	0.663333		1.43128	0.663333		7.66041	0.663333		0.674783	0.663333
0.706883	0.666667		1.43205	0.666667		7.70892	0.666667		0.6752	0.666667
0.707024	0.67		1.43493	0.67		7.71842	0.67		0.675386	0.67
0.707392	0.673333		1.43502	0.673333		7.73315	0.673333		0.680397	0.673333
0.712245	0.676667		1.43667	0.676667		7.74012	0.676667		0.681035	0.676667
0.7129	0.68		1.44127	0.68		7.76001	0.68		0.68177	0.68
0.717456	0.683333		1.4418	0.683333		7.76121	0.683333		0.682983	0.683333
0.718453	0.686667		1.44305	0.686667		7.76956	0.686667		0.685378	0.686667
0.719907	0.69		1.44313	0.69		7.80179	0.69		0.685518	0.69
0.723653	0.693333		1.44389	0.693333		7.80257	0.693333		0.687257	0.693333
0.726152	0.696667		1.44472	0.696667		7.80435	0.696667		0.688491	0.696667
0.727559	0.7		1.44863	0.7		7.84816	0.7		0.689045	0.7
0.727838	0.703333		1.4522	0.703333		7.85458	0.703333		0.690936	0.703333
0.732048	0.706667		1.45412	0.706667		7.86476	0.706667		0.691811	0.706667
0.732723	0.71		1.45424	0.71		7.87857	0.71		0.69542	0.71
0.733812	0.713333		1.45651	0.713333		7.8796	0.713333		0.697912	0.713333
0.73407	0.716667		1.45759	0.716667		7.89133	0.716667		0.69962	0.716667
0.734953	0.72		1.45982	0.72		7.89423	0.72		0.699989	0.72
0.735722	0.723333		1.4605	0.723333		7.92991	0.723333		0.700083	0.723333
0.740632	0.726667		1.46185	0.726667		7.94926	0.726667		0.704625	0.726667
0.743944	0.73		1.46314	0.73		7.96462	0.73		0.70626	0.73
0.744794	0.733333		1.46511	0.733333		7.96695	0.733333		0.712687	0.733333
0.746018	0.736667		1.46758	0.736667		8.0112	0.736667		0.717014	0.736667
0.746473	0.74		1.46775	0.74		8.05398	0.74		0.718113	0.74
0.751164	0.743333		1.47138	0.743333		8.06668	0.743333		0.721581	0.743333
0.753988	0.746667		1.47285	0.746667		8.08042	0.746667		0.722907	0.746667
0.75841	0.75		1.47319	0.75		8.08223	0.75		0.723576	0.75
0.758462	0.753333		1.47438	0.753333		8.10919	0.753333		0.72414	0.753333
0.758916	0.756667		1.47454	0.756667		8.16806	0.756667		0.725195	0.756667
0.761338	0.76		1.47642	0.76		8.17676	0.76		0.725891	0.76
0.761801	0.763333		1.48142	0.763333		8.19013	0.763333		0.727015	0.763333
0.764291	0.766667		1.48264	0.766667		8.21591	0.766667		0.727158	0.766667
0.764465	0.77		1.48291	0.77		8.22754	0.77		0.727487	0.77
0.76897	0.773333		1.48317	0.773333		8.24371	0.773333		0.728472	0.773333
0.785193	0.776667		1.4879	0.776667		8.26205	0.776667		0.730864	0.776667
0.787829	0.78		1.48865	0.78		8.30151	0.78		0.732187	0.78
0.78833	0.783333		1.49032	0.783333		8.32841	0.783333		0.733849	0.783333
0.788935	0.786667		1.4964	0.786667		8.41959	0.786667		0.734175	0.786667
0.791925	0.79		1.49773	0.79		8.42735	0.79		0.735846	0.79
0.79535	0.793333		1.50178	0.793333		8.45744	0.793333		0.73815	0.793333
0.795388	0.796667		1.50539	0.796667		8.46984	0.796667		0.747741	0.796667
0.796928	0.8		1.50663	0.8		8.47019	0.8		0.747934	0.8
0.797223	0.803333		1.50931	0.803333		8.55556	0.803333		0.750134	0.803333
0.798247	0.806667		1.51016	0.806667		8.56257	0.806667		0.752284	0.806667
0.799554	0.81		1.51028	0.81		8.61499	0.81		0.753604	0.81
0.805453	0.813333		1.51133	0.813333		8.63811	0.813333		0.754408	0.813333
0.810217	0.816667		1.51141	0.816667		8.65655	0.816667		0.763451	0.816667
0.811184	0.82		1.51451	0.82		8.6576	0.82		0.765267	0.82
0.814598	0.823333		1.51456	0.823333		8.69543	0.823333		0.767296	0.823333
0.816323	0.826667		1.51531	0.826667		8.75445	0.826667		0.768594	0.826667
0.817493	0.83		1.52243	0.83		8.77267	0.83		0.768655	0.83
0.823089	0.833333		1.52289	0.833333		8.90655	0.833333		0.768923	0.833333
0.823455	0.836667		1.52451	0.836667		8.91077	0.836667		0.769523	0.836667
0.826926	0.84		1.52528	0.84		8.98313	0.84		0.773091	0.84
0.82772	0.843333		1.5254	0.843333		9.09443	0.843333		0.775492	0.843333
0.833412	0.846667		1.52573	0.846667		9.09828	0.846667		0.779018	0.846667
0.838796	0.85		1.52743	0.85		9.16882	0.85		0.7798	0.85
0.839502	0.853333		1.52801	0.853333		9.18879	0.853333		0.783286	0.853333
0.841252	0.856667		1.53181	0.856667		9.2048	0.856667		0.784508	0.856667
0.853768	0.86		1.53432	0.86		9.3252	0.86		0.789851	0.86
0.854542	0.863333		1.53467	0.863333		9.44938	0.863333		0.792628	0.863333
0.857379	0.866667		1.5351	0.866667		9.52482	0.866667		0.795393	0.866667
0.864017	0.87		1.53572	0.87		9.55643	0.87		0.795854	0.87
0.874706	0.873333		1.54011	0.873333		9.61447	0.873333		0.798704	0.873333
0.877205	0.876667		1.54311	0.876667		9.63965	0.876667		0.804447	0.876667
0.879347	0.88		1.54878	0.88		9.67924	0.88		0.815212	0.88
0.881842	0.883333		1.55106	0.883333		9.72213	0.883333		0.817037	0.883333
0.882514	0.886667		1.55329	0.886667		9.73588	0.886667		0.818241	0.886667
0.883503	0.89		1.55802	0.89		9.74691	0.89		0.819258	0.89
0.884666	0.893333		1.56392	0.893333		9.76287	0.893333		0.819757	0.893333
0.884758	0.896667		1.56641	0.896667		9.76374	0.896667		0.820574	0.896667
0.887732	0.9		1.56767	0.9		9.76535	0.9		0.820718	0.9
0.890308	0.903333		1.56892	0.903333		9.83646	0.903333		0.821112	0.903333
0.892585	0.906667		1.57214	0.906667		9.84301	0.906667		0.821752	0.906667
0.899301	0.91		1.57457	0.91		9.86055	0.91		0.82176	0.91
0.905412	0.913333		1.58027	0.913333		9.88714	0.913333		0.82382	0.913333
0.912456	0.916667		1.58378	0.916667		9.90762	0.916667		0.824924	0.916667
0.920436	0.92		1.58555	0.92		9.92702	0.92		0.825745	0.92
0.922876	0.923333		1.58832	0.923333		9.92743	0.923333		0.827545	0.923333
0.93381	0.926667		1.58993	0.926667		9.92765	0.926667		0.830752	0.926667
0.935794	0.93		1.60373	0.93		9.96528	0.93		0.839519	0.93
0.938768	0.933333		1.61062	0.933333		9.96666	0.933333		0.845695	0.933333
0.952085	0.936667		1.61434	0.936667		9.97111	0.936667		0.84667	0.936667
0.956529	0.94		1.61439	0.94		9.97895	0.94		0.852767	0.94
0.959152	0.943333		1.61683	0.943333		10.0004	0.943333		0.856617	0.943333
0.959251	0.946667		1.61894	0.946667		10.0064	0.946667		0.85778	0.946667
0.970148	0.95		1.62063	0.95		10.0213	0.95		0.864296	0.95
0.97206	0.953333		1.62247	0.953333		10.0218	0.953333		0.866114	0.953333
0.979568	0.956667		1.62523	0.956667		10.0619	0.956667		0.875692	0.956667
0.980206	0.96		1.64064	0.96		10.0665	0.96		0.884139	0.96
0.980583	0.963333		1.64119	0.963333		10.071	0.963333		0.884971	0.963333
0.988157	0.966667		1.659	0.966667		10.1139	0.966667		0.894288	0.966667
0.99853	0.97		1.6591	0.97		10.2137	0.97		0.894705	0.97
1.00871	0.973333		1.66452	0.973333		10.2509	0.973333		0.897441	0.973333
1.03254	0.976667		1.69074	0.976667		10.4426	0.976667		0.90595	0.976667
1.03593	0.98		1.70779	0.98		10.5047	0.98		0.920798	0.98
1.04255	0.983333		1.71496	0.983333		10.6234	0.983333		0.937037	0.983333
1.0435	0.986667		1.71551	0.986667		10.6655	0.986667		0.93978	0.986667
1.04652	0.99		1.72385	0.99		10.7386	0.99		0.955153	0.99
1.04728	0.993333		1.76085	0.993333		10.8498	0.993333		0.972164	0.993333
1.06158	0.996667		1.76601	0.996667		10.9689	0.996667		0.988216	0.996667
1.1265	1		1.80434	1		11.0829	1		4.87748	1

## Sheet: Figure 8F
Figure 8F
The mean and standard deviation (SD) of these distances from different repetitions of the simulation related to System 1 to system 4
Mean					SD
System1	System2	System3	System4		System1	System2	System3	System4
0.586048	1.34982	6.69086	0.566209		0.235696	0.194976	2.15229	0.328013
0.575891	1.36182	6.08821	0.622734		0.214106	0.2685	2.28199	0.87121
0.569804	1.38899	4.77397	0.555349		0.213396	0.230544	2.57717	0.271554
0.623916	1.3419	5.73833	0.689279		0.721629	0.210068	2.56258	0.789455
0.57263	1.3177	4.04345	0.894893		0.214604	0.212119	2.63366	1.7293
0.792375	1.37625	5.86977	0.61907		1.34007	0.260436	2.26661	0.663602
0.566907	1.35641	6.13973	0.59828		0.217611	0.380234	2.15907	0.66886
0.605677	1.41115	4.97925	0.599105		0.573787	0.247501	2.24261	0.767397
0.574198	1.40053	6.0844	0.719005		0.220606	0.192015	2.2904	1.2297
0.570838	1.36693	5.62706	1.70826		0.220868	0.227497	2.62374	2.80511

## Sheet: Figure 8K
Figure 8K
Distance of all PCM clusters to the center of mass related to System 5 to system 8
System5			System6			System7			System8
Distance to center of mass (μm)	Cumilative distribution		Distance to center of mass (μm)	Cumilative distribution		Distance to center of mass (μm)	Cumilative distribution		Distance to center of mass (μm)	Cumilative distribution
0.475253	0.003333		0.038264	0.003333		0.18514	0.003333		0.635461	0.003333
0.542184	0.006667		0.057872	0.006667		0.185636	0.006667		0.67202	0.006667
0.620436	0.01		0.076168	0.01		0.226649	0.01		0.68796	0.01
0.671224	0.013333		0.091299	0.013333		0.242893	0.013333		0.715125	0.013333
0.697881	0.016667		0.113627	0.016667		0.256178	0.016667		0.720166	0.016667
0.742919	0.02		0.119884	0.02		0.283745	0.02		0.732324	0.02
0.803452	0.023333		0.124982	0.023333		0.284938	0.023333		0.734971	0.023333
0.803689	0.026667		0.131349	0.026667		0.312604	0.026667		0.745669	0.026667
0.816848	0.03		0.139674	0.03		0.32085	0.03		0.753252	0.03
0.820807	0.033333		0.149033	0.033333		0.323469	0.033333		0.759536	0.033333
0.83252	0.036667		0.163824	0.036667		0.325051	0.036667		0.785186	0.036667
0.834827	0.04		0.170426	0.04		0.332333	0.04		0.792176	0.04
0.850355	0.043333		0.178856	0.043333		0.334379	0.043333		0.79468	0.043333
0.852583	0.046667		0.179915	0.046667		0.335649	0.046667		0.809584	0.046667
0.874582	0.05		0.189685	0.05		0.342503	0.05		0.809714	0.05
0.890888	0.053333		0.192462	0.053333		0.345821	0.053333		0.812	0.053333
0.898564	0.056667		0.202305	0.056667		0.354579	0.056667		0.831165	0.056667
0.906909	0.06		0.206268	0.06		0.357851	0.06		0.838354	0.06
0.919927	0.063333		0.212694	0.063333		0.366503	0.063333		0.838902	0.063333
0.922991	0.066667		0.213242	0.066667		0.378565	0.066667		0.842434	0.066667
0.928989	0.07		0.218573	0.07		0.383382	0.07		0.843244	0.07
0.929124	0.073333		0.222587	0.073333		0.399661	0.073333		0.847448	0.073333
0.937964	0.076667		0.223998	0.076667		0.401281	0.076667		0.851178	0.076667
0.939956	0.08		0.239228	0.08		0.404671	0.08		0.858387	0.08
0.947179	0.083333		0.245957	0.083333		0.408799	0.083333		0.863065	0.083333
0.949654	0.086667		0.254321	0.086667		0.409964	0.086667		0.86512	0.086667
0.958095	0.09		0.256871	0.09		0.410834	0.09		0.881328	0.09
0.95844	0.093333		0.264199	0.093333		0.412571	0.093333		0.883248	0.093333
0.962848	0.096667		0.26792	0.096667		0.412835	0.096667		0.891358	0.096667
0.973455	0.1		0.270386	0.1		0.414431	0.1		0.891669	0.1
0.983051	0.103333		0.275152	0.103333		0.425857	0.103333		0.905646	0.103333
0.984909	0.106667		0.275161	0.106667		0.430081	0.106667		0.922913	0.106667
0.987733	0.11		0.278613	0.11		0.442024	0.11		0.926466	0.11
0.994555	0.113333		0.279155	0.113333		0.442533	0.113333		0.928121	0.113333
0.996955	0.116667		0.283765	0.116667		0.442809	0.116667		0.930287	0.116667
1.00206	0.12		0.286274	0.12		0.44318	0.12		0.931193	0.12
1.00236	0.123333		0.291643	0.123333		0.445546	0.123333		0.932389	0.123333
1.00535	0.126667		0.303811	0.126667		0.454514	0.126667		0.936914	0.126667
1.00557	0.13		0.307944	0.13		0.457078	0.13		0.940012	0.13
1.01015	0.133333		0.313175	0.133333		0.464605	0.133333		0.946526	0.133333
1.0148	0.136667		0.317637	0.136667		0.467677	0.136667		0.950199	0.136667
1.01594	0.14		0.319282	0.14		0.468328	0.14		0.952465	0.14
1.01833	0.143333		0.319341	0.143333		0.47457	0.143333		0.95682	0.143333
1.02031	0.146667		0.319698	0.146667		0.484552	0.146667		0.958678	0.146667
1.02119	0.15		0.331219	0.15		0.487864	0.15		0.96304	0.15
1.02336	0.153333		0.337086	0.153333		0.494065	0.153333		0.965497	0.153333
1.02532	0.156667		0.339027	0.156667		0.499252	0.156667		0.970084	0.156667
1.02551	0.16		0.340504	0.16		0.499416	0.16		0.9759	0.16
1.02715	0.163333		0.345026	0.163333		0.501876	0.163333		0.979862	0.163333
1.02944	0.166667		0.358675	0.166667		0.501982	0.166667		0.983084	0.166667
1.0314	0.17		0.359878	0.17		0.50296	0.17		0.983478	0.17
1.03145	0.173333		0.362744	0.173333		0.503264	0.173333		0.987537	0.173333
1.0344	0.176667		0.362758	0.176667		0.504235	0.176667		0.997259	0.176667
1.03689	0.18		0.362998	0.18		0.505533	0.18		1.01231	0.18
1.04378	0.183333		0.365762	0.183333		0.509226	0.183333		1.0145	0.183333
1.04492	0.186667		0.367929	0.186667		0.519843	0.186667		1.01897	0.186667
1.04634	0.19		0.368393	0.19		0.521902	0.19		1.01953	0.19
1.04664	0.193333		0.370292	0.193333		0.525732	0.193333		1.02093	0.193333
1.04682	0.196667		0.372616	0.196667		0.52589	0.196667		1.02544	0.196667
1.04772	0.2		0.377198	0.2		0.531391	0.2		1.0257	0.2
1.05228	0.203333		0.378225	0.203333		0.534239	0.203333		1.03266	0.203333
1.05752	0.206667		0.382165	0.206667		0.535794	0.206667		1.03554	0.206667
1.05896	0.21		0.386247	0.21		0.537832	0.21		1.03567	0.21
1.06279	0.213333		0.395491	0.213333		0.540501	0.213333		1.03777	0.213333
1.07447	0.216667		0.399575	0.216667		0.543358	0.216667		1.03945	0.216667
1.07722	0.22		0.399784	0.22		0.54375	0.22		1.03982	0.22
1.07781	0.223333		0.405192	0.223333		0.547139	0.223333		1.04172	0.223333
1.07989	0.226667		0.405668	0.226667		0.551764	0.226667		1.04487	0.226667
1.08213	0.23		0.409525	0.23		0.554732	0.23		1.0495	0.23
1.08215	0.233333		0.413552	0.233333		0.561931	0.233333		1.05145	0.233333
1.08261	0.236667		0.41604	0.236667		0.575897	0.236667		1.06022	0.236667
1.0842	0.24		0.41674	0.24		0.577709	0.24		1.06063	0.24
1.08444	0.243333		0.426376	0.243333		0.578032	0.243333		1.06323	0.243333
1.08564	0.246667		0.426582	0.246667		0.579884	0.246667		1.06726	0.246667
1.0865	0.25		0.430494	0.25		0.58256	0.25		1.06892	0.25
1.08892	0.253333		0.432093	0.253333		0.584722	0.253333		1.07197	0.253333
1.08907	0.256667		0.439557	0.256667		0.584725	0.256667		1.08089	0.256667
1.09343	0.26		0.442563	0.26		0.590148	0.26		1.08133	0.26
1.09594	0.263333		0.445473	0.263333		0.593307	0.263333		1.08283	0.263333
1.0979	0.266667		0.447121	0.266667		0.59466	0.266667		1.0913	0.266667
1.09819	0.27		0.44893	0.27		0.594989	0.27		1.09205	0.27
1.0989	0.273333		0.449335	0.273333		0.596291	0.273333		1.09582	0.273333
1.10067	0.276667		0.450004	0.276667		0.600956	0.276667		1.09736	0.276667
1.10221	0.28		0.452639	0.28		0.604221	0.28		1.10051	0.28
1.10354	0.283333		0.454348	0.283333		0.605417	0.283333		1.10702	0.283333
1.10536	0.286667		0.457841	0.286667		0.608195	0.286667		1.11248	0.286667
1.10685	0.29		0.464521	0.29		0.608272	0.29		1.11322	0.29
1.10854	0.293333		0.464621	0.293333		0.609493	0.293333		1.11334	0.293333
1.1086	0.296667		0.466816	0.296667		0.610632	0.296667		1.11785	0.296667
1.10913	0.3		0.470841	0.3		0.611009	0.3		1.11798	0.3
1.10959	0.303333		0.470851	0.303333		0.612434	0.303333		1.1229	0.303333
1.11149	0.306667		0.473314	0.306667		0.6156	0.306667		1.12562	0.306667
1.11192	0.31		0.474263	0.31		0.62524	0.31		1.13094	0.31
1.1132	0.313333		0.478191	0.313333		0.627443	0.313333		1.1359	0.313333
1.11679	0.316667		0.481949	0.316667		0.627897	0.316667		1.13669	0.316667
1.11766	0.32		0.481995	0.32		0.627912	0.32		1.13768	0.32
1.11837	0.323333		0.485232	0.323333		0.630381	0.323333		1.13855	0.323333
1.12094	0.326667		0.486254	0.326667		0.633705	0.326667		1.13913	0.326667
1.12319	0.33		0.493119	0.33		0.636549	0.33		1.15218	0.33
1.12529	0.333333		0.496472	0.333333		0.643281	0.333333		1.15524	0.333333
1.12668	0.336667		0.49857	0.336667		0.64644	0.336667		1.15647	0.336667
1.12908	0.34		0.499522	0.34		0.651807	0.34		1.15728	0.34
1.13031	0.343333		0.501366	0.343333		0.65521	0.343333		1.15837	0.343333
1.13062	0.346667		0.505958	0.346667		0.659288	0.346667		1.16053	0.346667
1.13128	0.35		0.506373	0.35		0.663925	0.35		1.16238	0.35
1.13275	0.353333		0.508024	0.353333		0.664622	0.353333		1.16711	0.353333
1.13339	0.356667		0.51272	0.356667		0.665117	0.356667		1.17031	0.356667
1.13353	0.36		0.514054	0.36		0.66604	0.36		1.17149	0.36
1.13358	0.363333		0.523419	0.363333		0.668692	0.363333		1.17945	0.363333
1.13445	0.366667		0.527198	0.366667		0.674685	0.366667		1.18004	0.366667
1.13571	0.37		0.528303	0.37		0.680729	0.37		1.18014	0.37
1.13591	0.373333		0.528745	0.373333		0.680924	0.373333		1.1808	0.373333
1.13776	0.376667		0.531253	0.376667		0.681717	0.376667		1.1903	0.376667
1.13931	0.38		0.535358	0.38		0.685476	0.38		1.19254	0.38
1.14005	0.383333		0.539083	0.383333		0.686569	0.383333		1.19854	0.383333
1.14198	0.386667		0.539537	0.386667		0.687085	0.386667		1.2055	0.386667
1.14432	0.39		0.53976	0.39		0.688468	0.39		1.20846	0.39
1.14523	0.393333		0.540645	0.393333		0.693077	0.393333		1.21017	0.393333
1.14685	0.396667		0.542012	0.396667		0.694053	0.396667		1.21089	0.396667
1.14742	0.4		0.542411	0.4		0.694272	0.4		1.21377	0.4
1.14818	0.403333		0.548721	0.403333		0.695758	0.403333		1.21527	0.403333
1.14939	0.406667		0.551852	0.406667		0.698008	0.406667		1.22037	0.406667
1.15332	0.41		0.553794	0.41		0.698025	0.41		1.22277	0.41
1.15483	0.413333		0.553877	0.413333		0.700723	0.413333		1.22345	0.413333
1.15853	0.416667		0.554906	0.416667		0.705599	0.416667		1.2237	0.416667
1.16949	0.42		0.556501	0.42		0.706099	0.42		1.22489	0.42
1.17137	0.423333		0.557439	0.423333		0.706902	0.423333		1.22787	0.423333
1.17299	0.426667		0.56476	0.426667		0.708806	0.426667		1.22954	0.426667
1.17418	0.43		0.565024	0.43		0.71329	0.43		1.23301	0.43
1.17491	0.433333		0.566799	0.433333		0.713999	0.433333		1.23428	0.433333
1.17553	0.436667		0.568882	0.436667		0.714127	0.436667		1.24082	0.436667
1.17722	0.44		0.571161	0.44		0.721156	0.44		1.24171	0.44
1.17817	0.443333		0.572891	0.443333		0.721512	0.443333		1.24382	0.443333
1.17992	0.446667		0.574995	0.446667		0.72179	0.446667		1.24512	0.446667
1.18498	0.45		0.575129	0.45		0.723065	0.45		1.24686	0.45
1.18528	0.453333		0.575593	0.453333		0.723636	0.453333		1.24728	0.453333
1.18591	0.456667		0.577689	0.456667		0.732787	0.456667		1.24777	0.456667
1.18725	0.46		0.582621	0.46		0.741039	0.46		1.24809	0.46
1.18827	0.463333		0.58734	0.463333		0.741193	0.463333		1.25	0.463333
1.19103	0.466667		0.58898	0.466667		0.750711	0.466667		1.25372	0.466667
1.19218	0.47		0.593844	0.47		0.750748	0.47		1.2544	0.47
1.19489	0.473333		0.596092	0.473333		0.752008	0.473333		1.25684	0.473333
1.1956	0.476667		0.598019	0.476667		0.752253	0.476667		1.25833	0.476667
1.19593	0.48		0.598513	0.48		0.755347	0.48		1.25935	0.48
1.19631	0.483333		0.601517	0.483333		0.757644	0.483333		1.25991	0.483333
1.19669	0.486667		0.607118	0.486667		0.757799	0.486667		1.26195	0.486667
1.19703	0.49		0.60721	0.49		0.760028	0.49		1.26403	0.49
1.19829	0.493333		0.61946	0.493333		0.762463	0.493333		1.26425	0.493333
1.19946	0.496667		0.619823	0.496667		0.763999	0.496667		1.27026	0.496667
1.20059	0.5		0.620736	0.5		0.765939	0.5		1.2724	0.5
1.20172	0.503333		0.624683	0.503333		0.766345	0.503333		1.27411	0.503333
1.20383	0.506667		0.625185	0.506667		0.773741	0.506667		1.27449	0.506667
1.20391	0.51		0.627115	0.51		0.775888	0.51		1.27462	0.51
1.20567	0.513333		0.627651	0.513333		0.77671	0.513333		1.27511	0.513333
1.2061	0.516667		0.627742	0.516667		0.777977	0.516667		1.27596	0.516667
1.20837	0.52		0.631035	0.52		0.781157	0.52		1.27629	0.52
1.20915	0.523333		0.633726	0.523333		0.784335	0.523333		1.27665	0.523333
1.20949	0.526667		0.636174	0.526667		0.788796	0.526667		1.28232	0.526667
1.20952	0.53		0.640285	0.53		0.790287	0.53		1.28939	0.53
1.2098	0.533333		0.642561	0.533333		0.79771	0.533333		1.29136	0.533333
1.21358	0.536667		0.64597	0.536667		0.798758	0.536667		1.29735	0.536667
1.21447	0.54		0.649145	0.54		0.802818	0.54		1.2977	0.54
1.21752	0.543333		0.649412	0.543333		0.803533	0.543333		1.29924	0.543333
1.21824	0.546667		0.650591	0.546667		0.805108	0.546667		1.3042	0.546667
1.22097	0.55		0.652589	0.55		0.807952	0.55		1.30677	0.55
1.22124	0.553333		0.653	0.553333		0.812305	0.553333		1.30823	0.553333
1.22254	0.556667		0.65857	0.556667		0.817864	0.556667		1.3097	0.556667
1.2227	0.56		0.659804	0.56		0.818337	0.56		1.31494	0.56
1.22545	0.563333		0.660475	0.563333		0.818669	0.563333		1.31544	0.563333
1.22591	0.566667		0.661603	0.566667		0.819807	0.566667		1.31674	0.566667
1.22687	0.57		0.66187	0.57		0.820542	0.57		1.31925	0.57
1.227	0.573333		0.663135	0.573333		0.821473	0.573333		1.32298	0.573333
1.2299	0.576667		0.664393	0.576667		0.826327	0.576667		1.32309	0.576667
1.22997	0.58		0.664823	0.58		0.827929	0.58		1.32368	0.58
1.23123	0.583333		0.666954	0.583333		0.828604	0.583333		1.32423	0.583333
1.23221	0.586667		0.671032	0.586667		0.829751	0.586667		1.3254	0.586667
1.23646	0.59		0.674575	0.59		0.833265	0.59		1.32909	0.59
1.23991	0.593333		0.674906	0.593333		0.837639	0.593333		1.32992	0.593333
1.24046	0.596667		0.67746	0.596667		0.841536	0.596667		1.33367	0.596667
1.24319	0.6		0.677657	0.6		0.843012	0.6		1.3354	0.6
1.2437	0.603333		0.682102	0.603333		0.843863	0.603333		1.33568	0.603333
1.24568	0.606667		0.682334	0.606667		0.845181	0.606667		1.34308	0.606667
1.2482	0.61		0.683123	0.61		0.846332	0.61		1.34472	0.61
1.24894	0.613333		0.686701	0.613333		0.848246	0.613333		1.34597	0.613333
1.25072	0.616667		0.688569	0.616667		0.850326	0.616667		1.34638	0.616667
1.25507	0.62		0.68961	0.62		0.855154	0.62		1.34991	0.62
1.25528	0.623333		0.690913	0.623333		0.858074	0.623333		1.35281	0.623333
1.256	0.626667		0.69113	0.626667		0.85894	0.626667		1.35603	0.626667
1.26087	0.63		0.70101	0.63		0.859981	0.63		1.35608	0.63
1.26374	0.633333		0.704167	0.633333		0.868464	0.633333		1.35677	0.633333
1.26415	0.636667		0.706208	0.636667		0.871128	0.636667		1.35691	0.636667
1.26968	0.64		0.706829	0.64		0.871132	0.64		1.35752	0.64
1.27144	0.643333		0.710147	0.643333		0.872254	0.643333		1.35961	0.643333
1.27626	0.646667		0.714131	0.646667		0.872464	0.646667		1.36074	0.646667
1.27951	0.65		0.714881	0.65		0.874531	0.65		1.36392	0.65
1.28368	0.653333		0.714907	0.653333		0.876089	0.653333		1.36459	0.653333
1.28459	0.656667		0.715405	0.656667		0.879348	0.656667		1.36724	0.656667
1.28586	0.66		0.720055	0.66		0.883491	0.66		1.3696	0.66
1.2882	0.663333		0.724798	0.663333		0.885763	0.663333		1.37116	0.663333
1.29019	0.666667		0.725812	0.666667		0.886188	0.666667		1.37264	0.666667
1.29073	0.67		0.727333	0.67		0.893568	0.67		1.37633	0.67
1.29117	0.673333		0.730558	0.673333		0.897346	0.673333		1.37731	0.673333
1.29251	0.676667		0.731319	0.676667		0.900263	0.676667		1.38415	0.676667
1.29312	0.68		0.734662	0.68		0.906329	0.68		1.38655	0.68
1.29644	0.683333		0.735001	0.683333		0.907215	0.683333		1.38773	0.683333
1.29761	0.686667		0.735101	0.686667		0.909179	0.686667		1.3879	0.686667
1.29896	0.69		0.740252	0.69		0.9148	0.69		1.38804	0.69
1.30011	0.693333		0.741577	0.693333		0.916024	0.693333		1.39874	0.693333
1.30079	0.696667		0.742445	0.696667		0.918457	0.696667		1.39877	0.696667
1.30147	0.7		0.742785	0.7		0.919454	0.7		1.39996	0.7
1.30205	0.703333		0.742994	0.703333		0.920544	0.703333		1.4003	0.703333
1.30221	0.706667		0.748235	0.706667		0.924126	0.706667		1.40377	0.706667
1.30307	0.71		0.748294	0.71		0.930071	0.71		1.40713	0.71
1.3036	0.713333		0.749258	0.713333		0.935804	0.713333		1.40938	0.713333
1.30674	0.716667		0.750237	0.716667		0.938008	0.716667		1.41128	0.716667
1.30721	0.72		0.751612	0.72		0.938258	0.72		1.4115	0.72
1.30807	0.723333		0.75489	0.723333		0.941229	0.723333		1.41164	0.723333
1.30832	0.726667		0.759085	0.726667		0.943804	0.726667		1.41192	0.726667
1.30899	0.73		0.759804	0.73		0.945381	0.73		1.41237	0.73
1.30971	0.733333		0.764724	0.733333		0.94918	0.733333		1.41517	0.733333
1.31171	0.736667		0.770129	0.736667		0.950071	0.736667		1.41827	0.736667
1.31235	0.74		0.77049	0.74		0.950232	0.74		1.42206	0.74
1.31317	0.743333		0.772475	0.743333		0.953449	0.743333		1.42425	0.743333
1.31577	0.746667		0.772546	0.746667		0.958182	0.746667		1.43121	0.746667
1.31829	0.75		0.774636	0.75		0.961329	0.75		1.43468	0.75
1.31889	0.753333		0.780255	0.753333		0.964031	0.753333		1.43545	0.753333
1.32155	0.756667		0.780667	0.756667		0.965393	0.756667		1.43559	0.756667
1.32594	0.76		0.785816	0.76		0.966928	0.76		1.43758	0.76
1.32604	0.763333		0.786289	0.763333		0.967511	0.763333		1.43841	0.763333
1.32651	0.766667		0.786299	0.766667		0.968718	0.766667		1.44092	0.766667
1.32719	0.77		0.792794	0.77		0.969814	0.77		1.44095	0.77
1.32839	0.773333		0.795748	0.773333		0.98183	0.773333		1.44159	0.773333
1.32889	0.776667		0.795808	0.776667		0.983298	0.776667		1.44172	0.776667
1.33048	0.78		0.797638	0.78		0.989956	0.78		1.446	0.78
1.3342	0.783333		0.800819	0.783333		0.994633	0.783333		1.4499	0.783333
1.33722	0.786667		0.809399	0.786667		1.00487	0.786667		1.45095	0.786667
1.3376	0.79		0.812695	0.79		1.005	0.79		1.45133	0.79
1.34615	0.793333		0.813031	0.793333		1.00623	0.793333		1.45203	0.793333
1.35215	0.796667		0.816354	0.796667		1.00985	0.796667		1.45262	0.796667
1.35245	0.8		0.817829	0.8		1.01096	0.8		1.45373	0.8
1.35519	0.803333		0.818066	0.803333		1.01781	0.803333		1.45781	0.803333
1.35593	0.806667		0.820648	0.806667		1.03196	0.806667		1.46118	0.806667
1.3563	0.81		0.820928	0.81		1.0331	0.81		1.46156	0.81
1.35877	0.813333		0.822961	0.813333		1.03624	0.813333		1.47082	0.813333
1.36119	0.816667		0.828178	0.816667		1.03779	0.816667		1.47139	0.816667
1.36926	0.82		0.829207	0.82		1.03864	0.82		1.47251	0.82
1.3737	0.823333		0.829833	0.823333		1.03874	0.823333		1.47479	0.823333
1.37725	0.826667		0.830812	0.826667		1.0393	0.826667		1.47791	0.826667
1.38001	0.83		0.832896	0.83		1.043	0.83		1.47929	0.83
1.38096	0.833333		0.836918	0.833333		1.04906	0.833333		1.48323	0.833333
1.38164	0.836667		0.845349	0.836667		1.0501	0.836667		1.48938	0.836667
1.38219	0.84		0.847178	0.84		1.05191	0.84		1.49021	0.84
1.3838	0.843333		0.850382	0.843333		1.05886	0.843333		1.49408	0.843333
1.3863	0.846667		0.851655	0.846667		1.06295	0.846667		1.49424	0.846667
1.38828	0.85		0.853491	0.85		1.06457	0.85		1.49531	0.85
1.38984	0.853333		0.858815	0.853333		1.06561	0.853333		1.4978	0.853333
1.39049	0.856667		0.861845	0.856667		1.0779	0.856667		1.50111	0.856667
1.39216	0.86		0.862263	0.86		1.07979	0.86		1.50242	0.86
1.39462	0.863333		0.871805	0.863333		1.08065	0.863333		1.50485	0.863333
1.4065	0.866667		0.872332	0.866667		1.0812	0.866667		1.5126	0.866667
1.41043	0.87		0.878649	0.87		1.09884	0.87		1.51546	0.87
1.41261	0.873333		0.881705	0.873333		1.10087	0.873333		1.52526	0.873333
1.41403	0.876667		0.884305	0.876667		1.1033	0.876667		1.52773	0.876667
1.41463	0.88		0.885571	0.88		1.10587	0.88		1.52815	0.88
1.41539	0.883333		0.888383	0.883333		1.10733	0.883333		1.53338	0.883333
1.41898	0.886667		0.890648	0.886667		1.10954	0.886667		1.53407	0.886667
1.42398	0.89		0.898481	0.89		1.11619	0.89		1.53483	0.89
1.43457	0.893333		0.90708	0.893333		1.11963	0.893333		1.53866	0.893333
1.43864	0.896667		0.90727	0.896667		1.1305	0.896667		1.54121	0.896667
1.44463	0.9		0.909196	0.9		1.13341	0.9		1.54292	0.9
1.44877	0.903333		0.91051	0.903333		1.13422	0.903333		1.55006	0.903333
1.4501	0.906667		0.911968	0.906667		1.1372	0.906667		1.55159	0.906667
1.45322	0.91		0.91356	0.91		1.14443	0.91		1.55381	0.91
1.45439	0.913333		0.913572	0.913333		1.14768	0.913333		1.55548	0.913333
1.45961	0.916667		0.91637	0.916667		1.15223	0.916667		1.55588	0.916667
1.46338	0.92		0.917072	0.92		1.15804	0.92		1.55694	0.92
1.46558	0.923333		0.922141	0.923333		1.15912	0.923333		1.5662	0.923333
1.46638	0.926667		0.928479	0.926667		1.16156	0.926667		1.56711	0.926667
1.475	0.93		0.934054	0.93		1.168	0.93		1.57438	0.93
1.48293	0.933333		0.941301	0.933333		1.18625	0.933333		1.57824	0.933333
1.48456	0.936667		0.945714	0.936667		1.18915	0.936667		1.58109	0.936667
1.49075	0.94		0.946613	0.94		1.19884	0.94		1.58633	0.94
1.49999	0.943333		0.950101	0.943333		1.20298	0.943333		1.59487	0.943333
1.51329	0.946667		0.96817	0.946667		1.21263	0.946667		1.61111	0.946667
1.51508	0.95		0.981028	0.95		1.21701	0.95		1.62394	0.95
1.53377	0.953333		0.984697	0.953333		1.23199	0.953333		1.62648	0.953333
1.53971	0.956667		0.993304	0.956667		1.23591	0.956667		1.62855	0.956667
1.54672	0.96		0.994688	0.96		1.25194	0.96		1.62989	0.96
1.5522	0.963333		0.997427	0.963333		1.25621	0.963333		1.63379	0.963333
1.56758	0.966667		0.999614	0.966667		1.25638	0.966667		1.63524	0.966667
1.58928	0.97		1.00433	0.97		1.29499	0.97		1.63742	0.97
1.59316	0.973333		1.01863	0.973333		1.30119	0.973333		1.64017	0.973333
1.60685	0.976667		1.02739	0.976667		1.31233	0.976667		1.64241	0.976667
1.60851	0.98		1.07022	0.98		1.34007	0.98		1.64674	0.98
1.62944	0.983333		1.07243	0.983333		1.35593	0.983333		1.64922	0.983333
1.64516	0.986667		1.08421	0.986667		1.35899	0.986667		1.66429	0.986667
1.67039	0.99		1.09691	0.99		1.38725	0.99		1.66844	0.99
1.72437	0.993333		1.09954	0.993333		8.87026	0.993333		1.68336	0.993333
1.73996	0.996667		1.11877	0.996667		9.7797	0.996667		1.7306	0.996667
9.71691	1		1.1219	1		9.98182	1		1.78939	1

## Sheet: Figure 8L
Figure 8L
The mean and standard deviation (SD) of these distances from different repetitions of the simulation related to System 5 to system 8
Mean					SD
1.22843	0.602249	0.857181	1.2473		0.527529	0.238027	0.911661	0.240594
1.21015	0.709956	0.673165	1.19659		0.170214	1.12309	0.26055	0.21322
1.24277	0.658466	0.669837	1.21773		0.577329	0.754865	0.518899	0.175525
1.12826	0.598308	0.680703	1.2713		0.22399	0.228231	0.793533	0.522821
1.1918	0.617013	0.736118	1.27017		0.202147	0.525573	0.598309	0.27344
1.17779	0.620744	0.686661	1.2572		0.268306	0.584783	0.899408	0.265624
1.19543	0.646706	0.676028	1.23852		0.464858	0.72582	0.558063	0.242667
1.15133	0.61624	0.666403	1.32608		0.223809	0.557062	0.579368	0.200202
1.18373	0.610422	0.696734	1.24336		0.167997	0.242498	0.265434	0.161507
1.23657	0.591335	0.69118	1.2626		0.265038	0.227897	0.787835	0.188683
